# Supplementary material for: Immune Gene Networks from Lung Cancer Patients Treated with Immune Checkpoint Inhibitors
Source: MDPI journal article supplement (doi:10.3390/biomedicines12030628), 2024-03-12

Supplementary Table S1. Summary of clinical study of immune checkpoint inhibitor for non squamous, non small cell lung cancer and advanced squamous cell lung cancer (LUSC).

|                         | Nonsquamous<br>Non-small-cell Lung<br>Cancer | LUSC |
|-------------------------|----------------------------------------------|------|
| Reference               | [8]                                          | [9]  |
| Median OS (month)       |                                              |      |
| Nivolumab               | 12.2                                         | 9.2  |
| Docetaxel               | 9.4                                          | 6    |
| HR                      | 0.73                                         | 0.59 |
| 1yr OS (%)              |                                              |      |
| Nivolumab               | 0.51                                         | 0.42 |
| Docetaxel               | 0.39                                         | 0.24 |
| 1yr PFS (%)             |                                              |      |
| Nivolumab               | 0.19                                         | 0.21 |
| Docetaxel               | 0.12                                         | 0.06 |
| 1yr PFS (month)         |                                              |      |
| Nivolumab               | 19                                           | NA   |
| Docetaxel               | 8                                            | NA   |
| HR                      | 0.92                                         | NA   |
| Median PFS              |                                              |      |
| Nivolumab               | 2.3                                          | 3.5  |
| Docetaxel               | 4.2                                          | 2.8  |
| HR                      | <b>0.92</b>                                  | 0.62 |
| Duration of<br>Response |                                              |      |
| Nivolumab               | 0.52                                         | 0.63 |
| Docetaxel               | 0.14                                         | 0.33 |

OS, overall survival; yr, year; HR, hazard ratio; PFS, progression free survival; NA, not available

Supplementary Table S2. Downloaded SRA raw data for GSE120622.

| Run        | GEO_Accession | source_name   | Histology |
|------------|---------------|---------------|-----------|
| SRR7939779 | GSM3405969    | lung cancer   | LUAD      |
| SRR7939780 | GSM3405970    | lung cancer   | LUAD      |
| SRR7939781 | GSM3405971    | lung cancer   | LUAD      |
| SRR7939783 | GSM3405973    | lung cancer   | LUAD      |
| SRR7939784 | GSM3405974    | lung cancer   | LUAD      |
| SRR7939785 | GSM3405975    | lung cancer   | LUAD      |
| SRR7939786 | GSM3405976    | lung cancer   | LUAD      |
| SRR7939787 | GSM3405977    | lung cancer   | LUAD      |
| SRR7939788 | GSM3405978    | lung cancer   | LUAD      |
| SRR7939789 | GSM3405979    | lung cancer   | LUAD      |
| SRR7939790 | GSM3405980    | lung cancer   | LUAD      |
| SRR7939791 | GSM3405981    | lung cancer   | LUAD      |
| SRR7939792 | GSM3405982    | lung cancer   | LUAD      |
| SRR7939793 | GSM3405983    | lung cancer   | LUAD      |
| SRR7939794 | GSM3405984    | lung cancer   | LUAD      |
| SRR7939795 | GSM3405985    | lung cancer   | LUAD      |
| SRR7939796 | GSM3405986    | lung cancer   | LUAD      |
| SRR7939797 | GSM3405987    | lung cancer   | LUAD      |
| SRR7939798 | GSM3405988    | lung cancer   | LUAD      |
| SRR7939823 | GSM3406013    | lung cancer   | LUSC      |
| SRR7939824 | GSM3406014    | lung cancer   | LUSC      |
| SRR7939825 | GSM3406015    | lung cancer   | LUSC      |
| SRR7939830 | GSM3406020    | lung cancer   | LUSC      |
| SRR7939831 | GSM3406021    | lung cancer   | LUSC      |
| SRR7939834 | GSM3406024    | lung cancer   | LUSC      |
| SRR7939835 | GSM3406025    | lung cancer   | LUSC      |
| SRR7939838 | GSM3406028    | lung cancer   | LUSC      |
| SRR7939839 | GSM3406029    | lung cancer   | LUSC      |
| SRR7939840 | GSM3406030    | lung cancer   | LUSC      |
| SRR7939841 | GSM3406031    | lung cancer   | LUSC      |
| SRR7939842 | GSM3406032    | lung cancer   | LUSC      |
| SRR7939843 | GSM3406033    | lung cancer   | LUSC      |
| SRR7939844 | GSM3406034    | lung cancer   | LUSC      |
| SRR7939845 | GSM3406035    | lung cancer   | LUSC      |
| SRR7939846 | GSM3406036    | lung cancer   | LUSC      |
| SRR7939847 | GSM3406037    | lung cancer   | LUSC      |
| SRR7939848 | GSM3406038    | lung cancer   | LUSC      |
| SRR7939849 | GSM3406039    | lung cancer   | LUSC      |
| SRR7939860 | GSM3406050    | adjacent lung | normal    |
| SRR7939861 | GSM3406051    | adjacent lung | normal    |
| SRR7939862 | GSM3406052    | adjacent lung | normal    |
| SRR7939863 | GSM3406053    | adjacent lung | normal    |
| SRR7939864 | GSM3406054    | adjacent lung | normal    |
| SRR7939865 | GSM3406055    | adjacent lung | normal    |
| SRR7939866 | GSM3406056    | adjacent lung | normal    |
| SRR7939867 | GSM3406057    | adjacent lung | normal    |
| SRR7939868 | GSM3406058    | adjacent lung | normal    |
| SRR7939869 | GSM3406059    | adjacent lung | normal    |
| SRR7939870 | GSM3406060    | adjacent lung | normal    |

|            |            |               |        |
|------------|------------|---------------|--------|
| SRR7939871 | GSM3406061 | adjacent lung | normal |
| SRR7939872 | GSM3406062 | adjacent lung | normal |
| SRR7939873 | GSM3406063 | adjacent lung | normal |
| SRR7939874 | GSM3406064 | adjacent lung | normal |
| SRR7939875 | GSM3406065 | adjacent lung | normal |
| SRR7939876 | GSM3406066 | adjacent lung | normal |
| SRR7939877 | GSM3406067 | adjacent lung | normal |
| SRR7939878 | GSM3406068 | adjacent lung | normal |

---

Supplementary Table S3. Downloaded SRA raw data for GSE111907.

| Run         | Sample     | BioSample    | SampleName | PT.num | histology | PT.cell      |
|-------------|------------|--------------|------------|--------|-----------|--------------|
| SRR11491791 | SRS6436479 | SAMN08719584 | GSM3044677 | T1     | adeno     | Malignant re |
| SRR11491792 | SRS6436480 | SAMN08719583 | GSM3044678 | T1     | adeno     | Fibroblast   |
| SRR11491793 | SRS6436481 | SAMN08719582 | GSM3044679 | T1     | adeno     | Endothelial  |
| SRR11491794 | SRS6436482 | SAMN08719581 | GSM3044680 | T1     | adeno     | Pan immune   |
| SRR11491800 | SRS6436488 | SAMN08719575 | GSM3044686 | T3     | sq        | Malignant    |
| SRR11491801 | SRS6436489 | SAMN08719574 | GSM3044687 | T3     | sq        | Fibroblast   |
| SRR11491802 | SRS6436490 | SAMN08719573 | GSM3044688 | T3     | sq        | Endothelial  |
| SRR11491803 | SRS6436491 | SAMN08719572 | GSM3044689 | T3     | sq        | Pan immune   |
| SRR11491805 | SRS6436493 | SAMN08719570 | GSM3044691 | T4     | sq        | Malignant    |
| SRR11491806 | SRS6436494 | SAMN08719569 | GSM3044692 | T4     | sq        | Fibroblast   |
| SRR11491807 | SRS6436495 | SAMN08719568 | GSM3044693 | T4     | sq        | Endothelial  |
| SRR11491808 | SRS6436496 | SAMN08719567 | GSM3044694 | T4     | sq        | Pan immune   |
| SRR11491810 | SRS6436498 | SAMN08719565 | GSM3044696 | T5     | adeno     | Malignant    |
| SRR11491811 | SRS6436499 | SAMN08719564 | GSM3044697 | T5     | adeno     | Fibroblast   |
| SRR11491812 | SRS6436500 | SAMN08719563 | GSM3044698 | T5     | adeno     | Endothelial  |
| SRR11491813 | SRS6436501 | SAMN08719677 | GSM3044699 | T5     | adeno     | Pan immune   |
| SRR11491815 | SRS6436503 | SAMN08719675 | GSM3044701 | T6     | adeno     | Malignant    |
| SRR11491816 | SRS6436504 | SAMN08719674 | GSM3044702 | T6     | adeno     | Fibroblast   |
| SRR11491817 | SRS6436505 | SAMN08719673 | GSM3044703 | T6     | adeno     | Endothelial  |
| SRR11491818 | SRS6436506 | SAMN08719672 | GSM3044704 | T6     | adeno     | Pan immune   |
| SRR11491820 | SRS6436508 | SAMN08719670 | GSM3044706 | T7     | adeno     | Malignant    |
| SRR11491821 | SRS6436509 | SAMN08719669 | GSM3044707 | T7     | adeno     | Fibroblast   |
| SRR11491822 | SRS6436510 | SAMN08719668 | GSM3044708 | T7     | adeno     | Endothelial  |
| SRR11491823 | SRS6436511 | SAMN08719667 | GSM3044709 | T7     | adeno     | Pan immune   |
| SRR11491825 | SRS6436513 | SAMN08719665 | GSM3044711 | T8     | adeno     | Malignant    |
| SRR11491826 | SRS6436514 | SAMN08719664 | GSM3044712 | T8     | adeno     | Fibroblast   |
| SRR11491827 | SRS6436515 | SAMN08719663 | GSM3044713 | T8     | adeno     | Endothelial  |
| SRR11491829 | SRS6436517 | SAMN08719729 | GSM3044715 | T8     | adeno     | Pan immune   |
| SRR11491836 | SRS6436524 | SAMN08719722 | GSM3044722 | T10    | adeno     | Malignant re |
| SRR11491838 | SRS6436526 | SAMN08719720 | GSM3044724 | T10    | adeno     | Fibroblast   |
| SRR11491839 | SRS6436527 | SAMN08719719 | GSM3044725 | T10    | adeno     | Endothelial  |
| SRR11491840 | SRS6436528 | SAMN08719718 | GSM3044726 | T10    | adeno     | Pan immune   |
| SRR11491843 | SRS6436531 | SAMN08719710 | GSM3044729 | T11    | adeno     | Malignant    |
| SRR11491844 | SRS6436532 | SAMN08719717 | GSM3044730 | T11    | adeno     | Fibroblast   |

|             |            |              |            |     |       |             |
|-------------|------------|--------------|------------|-----|-------|-------------|
| SRR11491845 | SRS6436533 | SAMN08719716 | GSM3044731 | T11 | adeno | Endothelial |
| SRR11491846 | SRS6436534 | SAMN08719715 | GSM3044732 | T11 | adeno | Pan immune  |
| SRR11491848 | SRS6436536 | SAMN08719713 | GSM3044734 | T12 | adeno | Malignant   |
| SRR11491849 | SRS6436537 | SAMN08719709 | GSM3044735 | T12 | adeno | Fibroblast  |
| SRR11491850 | SRS6436538 | SAMN08719708 | GSM3044736 | T12 | adeno | Endothelial |
| SRR11491851 | SRS6436539 | SAMN08719707 | GSM3044737 | T12 | adeno | Pan immune  |
| SRR11491853 | SRS6436541 | SAMN08719705 | GSM3044739 | T14 | sq    | Malignant   |
| SRR11491855 | SRS6436543 | SAMN08719703 | GSM3044741 | T14 | sq    | Endothelial |
| SRR11491857 | SRS6436545 | SAMN08719701 | GSM3044743 | T14 | sq    | Panimmune   |
| SRR11491859 | SRS6436546 | SAMN08719699 | GSM3044745 | T15 | sq    | Malignant   |
| SRR11491860 | SRS6436548 | SAMN08719698 | GSM3044746 | T15 | sq    | Fibroblast  |
| SRR11491861 | SRS6436549 | SAMN08719697 | GSM3044747 | T15 | sq    | Endothelial |
| SRR11491862 | SRS6436550 | SAMN08719740 | GSM3044748 | T15 | sq    | Pan immune  |
| SRR11491864 | SRS6436552 | SAMN08719738 | GSM3044750 | T16 | adeno | Malignant   |
| SRR11491865 | SRS6436553 | SAMN08719737 | GSM3044751 | T16 | adeno | Fibroblast  |
| SRR11491866 | SRS6436554 | SAMN08719736 | GSM3044752 | T16 | adeno | Endothelial |
| SRR11491867 | SRS6436555 | SAMN08719735 | GSM3044753 | T16 | adeno | Pan immune  |
| SRR11491868 | SRS6436557 | SAMN08719734 | GSM3044754 | T17 | sq    | Malignant   |
| SRR11491869 | SRS6436556 | SAMN08719733 | GSM3044755 | T17 | sq    | Fibroblast  |
| SRR11491870 | SRS6436558 | SAMN08719730 | GSM3044756 | T17 | sq    | Endothelial |
| SRR11491871 | SRS6436559 | SAMN08719638 | GSM3044757 | T17 | sq    | Pan immune  |
| SRR11491874 | SRS6436562 | SAMN08719732 | GSM3044760 | T18 | sq    | Malignant   |
| SRR11491875 | SRS6436563 | SAMN08719731 | GSM3044761 | T18 | sq    | Fibroblast  |
| SRR11491876 | SRS6436564 | SAMN08719635 | GSM3044762 | T18 | sq    | Endothelial |
| SRR11491877 | SRS6436565 | SAMN08719634 | GSM3044763 | T18 | sq    | Pan immune  |
| SRR11491879 | SRS6436567 | SAMN08719632 | GSM3044765 | T20 | sq    | Malignant   |
| SRR11491880 | SRS6436568 | SAMN08719631 | GSM3044766 | T20 | sq    | Fibroblast  |
| SRR11491881 | SRS6436569 | SAMN08719630 | GSM3044767 | T20 | sq    | Endothelial |
| SRR11491882 | SRS6436570 | SAMN08719629 | GSM3044768 | T20 | sq    | Pan immune  |
| SRR11491884 | SRS6436572 | SAMN08719696 | GSM3044770 | T22 | adeno | Malignant   |
| SRR11491885 | SRS6436573 | SAMN08719695 | GSM3044771 | T22 | adeno | Fibroblast  |
| SRR11491886 | SRS6436574 | SAMN08719694 | GSM3044772 | T22 | adeno | Endothelial |
| SRR11491887 | SRS6436576 | SAMN08719693 | GSM3044773 | T22 | adeno | Pan immune  |
| SRR11491892 | SRS6436396 | SAMN08719688 | GSM3044778 | T25 | sq    | Malignant   |
| SRR11491893 | SRS6436397 | SAMN08719687 | GSM3044779 | T25 | sq    | Fibroblast  |
| SRR11491894 | SRS6436398 | SAMN08719686 | GSM3044780 | T25 | sq    | Endothelial |
| SRR11491896 | SRS6436400 | SAMN08719684 | GSM3044782 | T25 | sq    | Pan immune  |

|             |            |              |            |     |       |             |
|-------------|------------|--------------|------------|-----|-------|-------------|
| SRR11491897 | SRS6436401 | SAMN08719683 | GSM3044783 | T26 | adeno | Malignant   |
| SRR11491898 | SRS6436402 | SAMN08719682 | GSM3044784 | T26 | adeno | Fibroblast  |
| SRR11491899 | SRS6436403 | SAMN08719681 | GSM3044785 | T26 | adeno | Endothelial |
| SRR11491900 | SRS6436404 | SAMN08719680 | GSM3044786 | T26 | adeno | Pan immune  |
| SRR11491902 | SRS6436406 | SAMN08719678 | GSM3044788 | T27 | adeno | Malignant   |
| SRR11491903 | SRS6436407 | SAMN08719598 | GSM3044789 | T27 | adeno | Fibroblast  |
| SRR11491904 | SRS6436408 | SAMN08719597 | GSM3044790 | T27 | adeno | Endothelial |
| SRR11491905 | SRS6436409 | SAMN08719596 | GSM3044791 | T27 | adeno | Pan immune  |
| SRR11491928 | SRS6436432 | SAMN08719643 | GSM3044814 | T32 | sq    | Malignant   |
| SRR11491929 | SRS6436433 | SAMN08719642 | GSM3044815 | T32 | sq    | Endothelial |
| SRR11491930 | SRS6436434 | SAMN08719639 | GSM3044816 | T32 | sq    | Pan immune  |
| SRR11491935 | SRS6436439 | SAMN08719640 | GSM3044821 | T34 | sq    | Fibroblast  |
| SRR11491936 | SRS6436440 | SAMN08719559 | GSM3044822 | T34 | sq    | Endothelial |
| SRR11491937 | SRS6436441 | SAMN08719558 | GSM3044823 | T34 | sq    | Pan immune  |
| SRR11491938 | SRS6436442 | SAMN08719557 | GSM3044824 | T34 | sq    | Malignant   |
| SRR11491782 | SRS6436464 | SAMN08719607 | GSM3044846 | T39 | sq    | Fibroblast  |
| SRR11491783 | SRS6436465 | SAMN08719606 | GSM3044847 | T39 | sq    | Endothelial |
| SRR11491784 | SRS6436466 | SAMN08719605 | GSM3044848 | T39 | sq    | Pan immune  |
| SRR11491785 | SRS6436467 | SAMN08719604 | GSM3044849 | T39 | sq    | Malignant   |
| SRR11491787 | SRS6436469 | SAMN08719602 | GSM3044851 | T40 | sq    | Fibroblast  |
| SRR11491788 | SRS6436470 | SAMN08719601 | GSM3044852 | T40 | sq    | Endothelial |
| SRR11491789 | SRS6436471 | SAMN08719600 | GSM3044853 | T40 | sq    | Pan immune  |
| SRR11491790 | SRS6436472 | SAMN08719599 | GSM3044854 | T40 | sq    | Malignant   |

PT, patient; adeno, adenocarcinoma; sq, squamous cell lung carcinoma

Supplementary Table S4. Softwares along with version and reference genome for alignment of RNA reads

| Softwares and versions / reference genome |
|-------------------------------------------|
| Ubuntu 22.04 LTS                          |
| Sratoolkit-3.0.10                         |
| HISAT2-2.2.1                              |
| Samtools-1.19                             |
| Stringtie-2.2.1                           |
| Reference genome: GRCH38                  |
| R version 4.3                             |
| DESeq2-1.42.0 (R package)                 |
| Hmisc-5.1-1 (R package)                   |
| ggplot2 3.5.0 (R package)                 |
| Cytoscape network analyzer 4.5.0          |
| igraph 2.0.2 (R package)                  |

Supplementary Table S5. Gene set enrichment for pathway analysis based on KEGG database

|                               | GSE87340                  | GSE120622             |                       | GSE111907-1            | GSE111907-2        |
|-------------------------------|---------------------------|-----------------------|-----------------------|------------------------|--------------------|
|                               | LUAD                      | LUAD                  | LUSC                  | LUAD                   | LUSC               |
| Control                       | 27                        | 19                    | 19                    | 10                     | 11                 |
| Tumor                         | 26                        | 19                    | 19                    | 10                     | 11                 |
| Up regulation                 | 23                        | 20                    | 31                    | 32                     | 32                 |
| Down regulation               | 25                        | 3                     | 6                     | 6                      | 7                  |
| Up regulated immune pathway   | NOD                       | Fc, BCR, Toll,RIG,TCR | Fc, BCR, TCR,Toll,RIG | Fc, NOD,TCR, Toll, RIG | Fc, TCR,NOD, RIG,K |
| Down regulated immune pathway | B, C, K, H, LM, NK, Fc, T | H                     | H,C,IgA,LM            | H,C,IgA                | H,C,IgA            |

LUAD, adenocarcinoma non-small-cell lung cancer; LUSC, squamous non-small-cell lung carcinoma; APC, antigen processing and presentation; BCR, B cell receptor signaling pathway; C, complement and coagulation pathway; Fc, Fc gamma receptor mediated phagocytosis; H, hematopoietic cell lineage; IgA, intestinal immune network for IgA production; K, cytokine-chemokine signaling pathway; LM, leukocyte migration; NK, NK cell mediated cytotoxicity; NOD-like receptor signaling pathway, RIG, RIG-I like receptor signaling; Toll, Toll-like receptor signaling pathway; TCR, T cell receptor signaling pathway,



Supplementary Table S6. Number of gene with Annotated gene function in the constructed networks

| Dataset     | sample | Gene Function |      |      |      |      |      |      |      |      |      | Total |
|-------------|--------|---------------|------|------|------|------|------|------|------|------|------|-------|
|             |        | A             | APC  | CP   | H    | I    | K    | LM   | NK   | P    | S    |       |
| GSE87340    | Normal | 54            | 0    | 1    | 9    | 39   | 17   | 3    | 15   | 5    | 12   | 155   |
|             | Rate   | 0.35          | 0.00 | 0.01 | 0.06 | 0.25 | 0.11 | 0.02 | 0.10 | 0.03 | 0.08 | 1     |
|             | LUAD   | 34            | 0    | 2    | 7    | 13   | 10   | 2    | 7    | 1    | 3    | 79    |
|             | Rate   | 0.43          | 0.00 | 0.03 | 0.09 | 0.16 | 0.13 | 0.03 | 0.09 | 0.01 | 0.04 | 1     |
| GSE120622   | Normal | 101           | 2    | 16   | 16   | 103  | 36   | 26   | 26   | 23   | 36   | 385   |
|             | Rate   | 0.26          | 0.01 | 0.04 | 0.04 | 0.27 | 0.09 | 0.07 | 0.07 | 0.06 | 0.09 | 1.00  |
|             | LUAD   | 63            | 0    | 18   | 19   | 43   | 26   | 16   | 19   | 14   | 10   | 228   |
|             | Rate   | 0.28          | 0.00 | 0.08 | 0.08 | 0.19 | 0.11 | 0.07 | 0.08 | 0.06 | 0.04 | 1.00  |
|             | LUSC   | 50            | 2    | 9    | 12   | 30   | 15   | 12   | 15   | 8    | 3    | 156   |
|             | Rate   | 0.32          | 0.01 | 0.06 | 0.08 | 0.19 | 0.10 | 0.08 | 0.10 | 0.05 | 0.02 | 1.00  |
| GSE111907-1 | Normal | 98            | 2    | 10   | 12   | 114  | 30   | 17   | 39   | 22   | 41   | 385   |
|             | Rate   | 0.25          | 0.01 | 0.03 | 0.03 | 0.30 | 0.08 | 0.04 | 0.10 | 0.06 | 0.11 | 1.00  |
|             | LUAD   | 32            | 0    | 9    | 8    | 49   | 18   | 9    | 10   | 8    | 15   | 158   |
|             | Rate   | 0.20          | 0.00 | 0.06 | 0.05 | 0.31 | 0.11 | 0.06 | 0.06 | 0.05 | 0.09 | 1.00  |
| GSE111907-2 | Normal | 103           | 2    | 11   | 12   | 116  | 31   | 20   | 41   | 23   | 41   | 400   |
|             | Rate   | 0.26          | 0.01 | 0.03 | 0.03 | 0.29 | 0.08 | 0.05 | 0.10 | 0.06 | 0.10 | 1.00  |
|             | LUSC   | 21            | 0    | 13   | 7    | 26   | 12   | 10   | 13   | 8    | 6    | 116   |
|             | Rate   | 0.18          | 0.00 | 0.11 | 0.06 | 0.22 | 0.10 | 0.09 | 0.11 | 0.07 | 0.05 | 1.00  |

LUAD, adenocarcinoma non-small-cell lung cancer; LUSC, squamous non-small-cell lung carcinoma; A, daptive immunity; APC, antigen presentation; CP, coagulation; H, hematopoiesis; I, innate immunity; K, cytokine and chemokine; LM, leukocyte migration; NK, NK cell; P, platelet; S, signaling

Supplementary Table S7. Connectivity analysis for GSE87340 LUAD

| Name                   | Type   | Perturbagen Id | Target                                                                                                                                               | MOA                                                                                                                                                     |
|------------------------|--------|----------------|------------------------------------------------------------------------------------------------------------------------------------------------------|---------------------------------------------------------------------------------------------------------------------------------------------------------|
| CGP-57380              | trt_cp | BRD-K42500029  | AURKB, LCK, MKNK1, MKNK2, SGK1                                                                                                                       | MAP kinase inhibitor                                                                                                                                    |
| chloroquine            | trt_cp | BRD-A91699651  | CYP2C8, GSTA2, MRGPRX1, TLR9, TNF                                                                                                                    | Antimalarial                                                                                                                                            |
| dorsomorphin           | trt_cp | BRD-K54233340  | ACVR1, BMPR1A, BMPR1B, EPHA2, FKBP1A, FLT1, FLT3, KDR, LCK, MKNK1, PRKAA1, RPS6KA1, SRC                                                              | AMPK inhibitor                                                                                                                                          |
| indoprofen             | trt_cp | BRD-A44090213  | PTGS1, PTGS2, CXCR1, CXCR2                                                                                                                           | Cyclooxygenase inhibitor, Prostanoid receptor antagonist                                                                                                |
| indirubin              | trt_cp | BRD-K53959060  | CDK1, CDK5, CCNE1, CDK2, CDK4, CDK5R1, CDK9, GSK3A, GSK3B, LCK, LRRK1, LRRK2                                                                         | CDK inhibitor, Glycogen synthase kinase inhibitor, Leucine rich repeat kinase inhibitor, SRC inhibitor, Serum/glucocorticoid regulated kinase inhibitor |
| indirubin              | trt_cp | BRD-K19136521  | CDK1, CDK5, CCNE1, CDK2, CDK4, CDK5R1, CDK9, GSK3A, GSK3B, LCK, LRRK1, LRRK2                                                                         | CDK inhibitor                                                                                                                                           |
| LY-294002              | trt_cp | BRD-K27305650  | MTOR, PIK3CD, PIK3CG, PIK3CA, PIK3CB, PLK1, PRKDC, AKT1, CHEK1, GSK3B, LCK, MAPK1, MAPK11, MAPK12, MAPK14, MAPK8, PDE2A, PRKCA, ROCK1, RPS6KB1, SGK1 | MTOR inhibitor, PI3K inhibitor, DNA dependent protein kinase inhibitor, Phosphodiesterase inhibitor, PLK inhibitor                                      |
| bisindolylmaleimide-ix | trt_cp | BRD-K06543683  | SIRT1, AKT1, GSK3B, LCK, LRRK2, MAPK1, MAPK11, MAPK12, MAPK14, MAPK8, PRKCA, ROCK1, RPS6KB1, SIRT2                                                   | CDK inhibitor, PKC inhibitor                                                                                                                            |
| SRC-kinase-inhibitor-I | trt_cp | BRD-K50495309  | CSK, LCK, RIPK2                                                                                                                                      | SRC inhibitor                                                                                                                                           |
| TCS-359                | trt_cp | BRD-K81376179  | FLT3                                                                                                                                                 | FLT3 inhibitor                                                                                                                                          |
| wortmannin             | trt_cp | BRD-A11678676  | PIK3CA, PIK3CG, PLK1, ATM, ATR, MTOR, PI4KA, PI4KB, PIK3CD, PIK3R1, PLK3, PRKDC                                                                      | PI3K inhibitor                                                                                                                                          |

|                    |        |               |                                                                                                                            |                                                                                       |
|--------------------|--------|---------------|----------------------------------------------------------------------------------------------------------------------------|---------------------------------------------------------------------------------------|
| ZK-756326          | trt_cp | BRD-K56403959 | CCR8                                                                                                                       | CC chemokine receptor ligand                                                          |
| ZM-39923           | trt_cp | BRD-K40624912 | JAK1, JAK3                                                                                                                 | JAK inhibitor                                                                         |
| AG-490             | trt_cp | BRD-K12357156 | JAK2, JAK3, EGFR, STAT3                                                                                                    | EGFR inhibitor, ErbB2 inhibitor, JAK inhibitor                                        |
| tyrphostin-AG-82   | trt_cp | BRD-K03670461 | EGFR, LCK                                                                                                                  | EGFR inhibitor                                                                        |
| tyrphostin-AG-1296 | trt_cp | BRD-K76064317 | FLT3                                                                                                                       | FLT3 inhibitor                                                                        |
| aminogestrol       | trt_cp | BRD-K04976539 | LCK                                                                                                                        | SRC inhibitor                                                                         |
| GTP-14564          | trt_cp | BRD-K16664969 | FLT3, CSF1R, KIT, PDGFRB                                                                                                   | FLT3 inhibitor, Tyrosine kinase inhibitor                                             |
| ivermectin         | trt_cp | BRD-A48570745 | CHRNA7, GABRB3, GLRA3, P2RX7                                                                                               | GABA receptor agonist                                                                 |
| JAK3-inhibitor-I   | trt_cp | BRD-K72541103 | JAK3                                                                                                                       | JAK inhibitor                                                                         |
| JAK3-Inhibitor-II  | trt_cp | BRD-K52850071 | EGFR, ALK, JAK1, JAK2, JAK3                                                                                                | JAK inhibitor                                                                         |
| JAK3-inhibitor-V   | trt_cp | BRD-K95676198 | JAK3                                                                                                                       | JAK inhibitor                                                                         |
| JAK3-inhibitor-VI  | trt_cp | BRD-K04546108 | JAK3                                                                                                                       | JAK inhibitor                                                                         |
| ketoprofen         | trt_cp | BRD-A97739905 | PTGS2, PTGS1, CXCR1, SLC5A8                                                                                                | Cyclooxygenase inhibitor                                                              |
| KN-62              | trt_cp | BRD-A81177136 | AKT1, CAMK2A, CHEK1, LCK, MAPK1, MAPK11, MAPK12, MAPK14, MAPK8, P2RX7, PRKCA, ROCK1, RPS6KB1, SGK1                         | Calcium-calmodulin dependent protein kinase inhibitor, Purinergic receptor antagonist |
| kenpaullone        | trt_cp | BRD-K37312348 | GSK3B, CDK1, CDK5, CCNB1, CDK2, LCK                                                                                        | CDK inhibitor, Glycogen synthase kinase inhibitor                                     |
| lavendustin-a      | trt_cp | BRD-K23583188 | EGFR, LCK                                                                                                                  | EGFR inhibitor                                                                        |
| LFM-A13            | trt_cp | BRD-A30655177 | BTK                                                                                                                        | BTK inhibitor                                                                         |
| leflunomide        | trt_cp | BRD-K78692225 | DHODH, AHR, CYP2C19, JAK3, PTK2B, STAT6                                                                                    | Dihydroorotate dehydrogenase inhibitor, PDGFR receptor inhibitor                      |
| PD-98059           | trt_cp | BRD-K62810658 | MAP2K1, AKT1, CHEK1, GSK3B, LCK, MAP2K2, MAPK1, MAPK11, MAPK12, MAPK14, MAPK3, MAPK8, PRKCA, RAF1, ROCK1, RPS6KB1, SGK1    | MEK inhibitor, MAP kinase inhibitor                                                   |
| D-64406            | trt_cp | BRD-K27665173 | FLT3, PDGFRA, PDGFRB                                                                                                       | PDGFR receptor inhibitor                                                              |
| midostaurin        | trt_cp | BRD-K13646352 | FLT3, KIT, CCNB1, FLT1, KDR, PDGFRB, PRKCA, PRKCG, VEGFA                                                                   | FLT3 inhibitor, KIT inhibitor, PKC inhibitor                                          |
| PP-2               | trt_cp | BRD-K95785537 | SRC, LCK, ABL1, LYN, RIPK2                                                                                                 | SRC inhibitor                                                                         |
| quercetin          | trt_cp | BRD-K97399794 | PIK3CG, AKR1B1, ATP5A1, ATP5B, ATP5C1, CYP2C8, EGFR, GAA, HCK, HIBCH, MAOA, PIM1, PTPN1, SCN5A, SIRT1, STK17B, UGT3A1, XDH | Polar auxin transport inhibitor                                                       |

|                                  |        |               |                                                                                                                                |                                                          |
|----------------------------------|--------|---------------|--------------------------------------------------------------------------------------------------------------------------------|----------------------------------------------------------|
| SB-202190                        | trt_cp | BRD-K54330070 | MAPK14, AKT1, ALOX5, CHEK1, GSK3B, LCK, MAPK1, MAPK11, MAPK12, MAPK8, PRKCA, ROCK1, RPS6KB1, SGK1                              | p38 MAPK inhibitor                                       |
| SB-225002                        | trt_cp | BRD-K61323504 | CXCR2                                                                                                                          | CC chemokine receptor antagonist                         |
| semaxanib                        | trt_cp | BRD-K63504947 | KDR, FLT1, KIT, PDGFRB, FGFR1, FLT3, MET, PDGFRA, RET                                                                          | VEGFR inhibitor                                          |
| SU-6656                          | trt_cp | BRD-K97354755 | LYN, AURKB, AURKC, BRSK2, CALM1, CAMK2D, LCK, RET, SRC, YES1                                                                   | SRC inhibitor                                            |
| 4,5,6,7-tetrabromo benzotriazole | trt_cp | BRD-K97118047 | CSNK2A1, AKT1, CHEK1, CSNK2A2, CSNK2B, GSK3B, LCK, MAP2K1, MAPK1, MAPK11, MAPK12, MAPK14, MAPK8, PRKCA, ROCK1, RPS6KB1, SGK1   | Casein kinase inhibitor                                  |
| U-0126                           | trt_cp | BRD-K18787491 | AKT1, CHEK1, GSK3B, JAK2, LCK, MAP2K1, MAP2K2, MAP2K7, MAPK1, MAPK11, MAPK12, MAPK14, MAPK8, PRKCA, RAF1, ROCK1, RPS6KB1, SGK1 | MEK inhibitor                                            |
| dactolisib                       | trt_cp | BRD-K12184916 | MTOR, PIK3CA, PIK3CG, PIK3CD, ATR, PIK3CB                                                                                      | MTOR inhibitor, PI3K inhibitor, Protein kinase inhibitor |
| AS-605240                        | trt_cp | BRD-K41895714 | MAOB, PIK3CA, PIK3CB, PIK3CD, PIK3CG                                                                                           | PI3K inhibitor                                           |
| BMS-536924                       | trt_cp | BRD-K34581968 | IGF1R, AKT1, CCNE1, CDK2, CYP3A4, ERBB2, INSR, KDR, LCK, MAPK1, MET, PDGFRA, PDGFRB                                            | IGF-1 inhibitor                                          |
| KU-0060648                       | trt_cp | BRD-K09499853 | PIK3CA, PIK3CB, PIK3CD, PIK3CG, PRKDC                                                                                          | DNA dependent protein kinase inhibitor, PI3K inhibitor   |
| PI-103                           | trt_cp | BRD-K67868012 | PIK3CA, PIK3CG, MTOR, PIK3CB, PIK3CD, PRKDC                                                                                    | MTOR inhibitor, PI3K inhibitor                           |
| fostamatinib                     | trt_cp | BRD-K20285085 | SYK, FLT3, RET                                                                                                                 | SYK inhibitor                                            |
| TG-101348                        | trt_cp | BRD-K12502280 | JAK2, FLT3, BRD4, JAK1, JAK3, RET, TYK2                                                                                        | FLT3 inhibitor, JAK inhibitor                            |
| myricetin                        | trt_cp | BRD-K43149758 | PIK3CG, AR, CYP3A4                                                                                                             | Androgen receptor agonist, Cytochrome P450 inhibitor     |
| HG-6-64-01                       | trt_cp | BRD-U37049823 | ABL1, BRAF, CSF1R, EGFR, FGFR1, FLT3, KIT, MAPK11, PDGFRB, RET                                                                 | RAF inhibitor                                            |
| JW-7-24-1                        | trt_cp | BRD-U68942961 | LCK                                                                                                                            | LCK Inhibitor                                            |
| NM-PP1                           | trt_cp | BRD-K78278890 | CAMK2A, LCK, MAPK8, PRKACA, RIPK2, SRC                                                                                         | Mutant kinase inhibitor                                  |
| tozasertib                       | trt_cp | BRD-K59369769 | AURKA, AURKB, ABL1, AURKC, BCR, FLT3, JAK2, DDR2, LCK                                                                          | Aurora kinase inhibitor, BCR-ABL kinase                  |

|                    |        |               |                                                                                                                                                                             |                                                                                                                                                 |
|--------------------|--------|---------------|-----------------------------------------------------------------------------------------------------------------------------------------------------------------------------|-------------------------------------------------------------------------------------------------------------------------------------------------|
|                    |        |               |                                                                                                                                                                             | inhibitor, FLT3 inhibitor,<br>JAK inhibitor                                                                                                     |
| dasatinib          | trt_cp | BRD-K49328571 | ABL1, FYN, LCK, SRC, KIT, YES1,<br>BCR, EPHA2, LYN, PDGFRB, ABL2,<br>BTK, DDR1, DDR2, PDGFRA,<br>STAT5B                                                                     | BCR-ABL kinase<br>inhibitor, Ephrin<br>inhibitor, KIT inhibitor,<br>PDGFR receptor<br>inhibitor, SRC inhibitor,<br>Tyrosine kinase<br>inhibitor |
| sorafenib          | trt_cp | BRD-K49810818 | RET, BRAF, FLT3, KDR, RAF1,<br>FLT1, FLT4, KIT, DDR2, FGFR1,<br>PDGFRB, CYP2B6, CYP2C8,<br>CYP3A5, PDGFB, SLCO1B3                                                           | FLT3 inhibitor, KIT<br>inhibitor, PDGFR<br>receptor inhibitor, RAF<br>inhibitor, VEGFR<br>inhibitor, RET tyrosine<br>kinase inhibitor           |
| saracatinib        | trt_cp | BRD-K19540840 | SRC, ABL1, LCK, YES1                                                                                                                                                        | SRC inhibitor                                                                                                                                   |
| tandutinib         | trt_cp | BRD-K89162000 | FLT3, KIT, PDGFRA, PDGFRB,<br>CSF1R, PDGFD                                                                                                                                  | FLT3 inhibitor, KIT<br>inhibitor, PDGFR<br>receptor inhibitor                                                                                   |
| ZSTK-474           | trt_cp | BRD-K63068307 | PIK3CG, PIK3CA, PIK3CB, PIK3CD                                                                                                                                              | PI3K inhibitor                                                                                                                                  |
| TG100-115          | trt_cp | BRD-K64785675 | PIK3CG, PIK3CA, PIK3CB, PIK3CD                                                                                                                                              | -666                                                                                                                                            |
| tofacitinib        | trt_cp | BRD-K31283835 | JAK3, JAK1, JAK2, CYP2C19, TYK2                                                                                                                                             | JAK inhibitor                                                                                                                                   |
| GDC-0941           | trt_cp | BRD-K52911425 | PIK3CG, PIK3CA, PIK3CB, PIK3CD                                                                                                                                              | PI3K inhibitor                                                                                                                                  |
| QL-X-138           | trt_cp | BRD-U33728988 | BTK, JAK3, MKNK2, MTOR,<br>PRKDC                                                                                                                                            | MTOR inhibitor                                                                                                                                  |
| WH-4023            | trt_cp | BRD-U44618005 | ABL1, LCK, SRC                                                                                                                                                              | SRC inhibitor                                                                                                                                   |
| QL-XII-47          | trt_cp | BRD-U86922168 | BMX, BTK                                                                                                                                                                    | BTK inhibitor,<br>Cytoplasmic tyrosine<br>protein kinase BMX<br>inhibitor                                                                       |
| AS-604850          | trt_cp | BRD-K63915849 | PIK3CG, PIK3CA                                                                                                                                                              | PI3K inhibitor                                                                                                                                  |
| tyrphostin-AG-1295 | trt_cp | BRD-K57926513 | FLT3, KDR, PDGFRA, PDGFRB                                                                                                                                                   | PDGFR receptor<br>inhibitor                                                                                                                     |
| ruxolitinib        | trt_cp | BRD-K53972329 | JAK1, JAK2, TYK2, JAK3                                                                                                                                                      | JAK inhibitor                                                                                                                                   |
| dexketoprofen      | trt_cp | BRD-K43764301 | CXCR1, PTGS1, PTGS2, SLC5A8                                                                                                                                                 | Cyclooxygenase<br>inhibitor                                                                                                                     |
| SB-203580          | trt_cp | BRD-K99291625 | MAPK14, MAPK1, MAPK11, AKT1,<br>ALOX5, CHEK1, CYP2D6, CYP3A4,<br>GAK, GSK3B, LCK, MAPK10,<br>MAPK12, MAPK8, MAPK9,<br>PRKCA, RAF1, RIPK2, ROCK1,<br>RPS6KB1, SGK1, SRC, TNF | p38 MAPK inhibitor                                                                                                                              |
| terreic-acid       | trt_cp | BRD-A64228451 | BTK                                                                                                                                                                         | BTK inhibitor                                                                                                                                   |
| AZD-6482           | trt_cp | BRD-K58772419 | PIK3CD, PIK3CG, PIK3CA, PIK3CB                                                                                                                                              | PI3K inhibitor                                                                                                                                  |
| KIN001-055         | trt_cp | BRD-K68407802 | EGFR, JAK3                                                                                                                                                                  | EGFR inhibitor, JAK<br>inhibitor, Leukotriene<br>inhibitor, Mediator<br>release inhibitor                                                       |

|               |            |                    |                                                                                                                                                                                                                                 |                                                                                                         |
|---------------|------------|--------------------|---------------------------------------------------------------------------------------------------------------------------------------------------------------------------------------------------------------------------------|---------------------------------------------------------------------------------------------------------|
| quizartinib   | trt_cp     | BRD-K93918653      | FLT3, CSF1R, KIT, RET, PDGFRA, PDGFRB                                                                                                                                                                                           | FLT3 inhibitor                                                                                          |
| lestaurtinib  | trt_cp     | BRD-K23192422      | FLT3, NTRK1, JAK2, NTRK2, NTRK3                                                                                                                                                                                                 | FLT3 inhibitor, Growth factor receptor inhibitor, JAK inhibitor                                         |
| linifanib     | trt_cp     | BRD-K99749624      | CSF1R, KDR, PDGFRB, FLT1, FLT3, FLT4, CSF1, KIT, PDGFRA, RET, TEK                                                                                                                                                               | PDGFR receptor inhibitor, VEGFR inhibitor                                                               |
| cediranib     | trt_cp     | BRD-K86930074      | KDR, FLT1, FLT4, KIT, PDGFRB, CSF1R, FLT3, PDGFRA                                                                                                                                                                               | KIT inhibitor, VEGFR inhibitor                                                                          |
| dovitinib     | trt_cp     | BRD-K85402309      | EGFR, FGFR3, PDGFRB, CSF1R, FGFR1, FGFR2, FLT1, FLT3, FLT4, INSR, KDR, KIT, PDGFRA                                                                                                                                              | EGFR inhibitor, FLT3 inhibitor, FGFR inhibitor, PDGFR receptor inhibitor, VEGFR inhibitor               |
| sunitinib     | trt_cp     | BRD-M64432851      | FLT3, KDR, KIT, FLT4, FLT1, PDGFRA, PDGFRB, RET, CSF1R, FGFR1                                                                                                                                                                   | FLT3 inhibitor, KIT inhibitor, PDGFR receptor inhibitor, RET tyrosine kinase inhibitor, VEGFR inhibitor |
| XL-147        | trt_cp     | BRD-K95901403      | PIK3CA, PIK3CD, PIK3CG                                                                                                                                                                                                          | PI3K inhibitor                                                                                          |
| PIK-75        | trt_cp     | BRD-M16762496      | PIK3CA, PIK3CB, PIK3CD, PIK3CG, PRKDC                                                                                                                                                                                           | DNA protein kinase inhibitor, PI3K inhibitor                                                            |
| sunitinib     | trt_cp     | BRD-K70511574      | FLT3, KDR, KIT, FLT4, FLT1, PDGFRA, PDGFRB, RET, CSF1R, FGFR1                                                                                                                                                                   | PLK inhibitor                                                                                           |
| GSK-1059615   | trt_cp     | BRD-K06750613      | PIK3CA, PIK3CG                                                                                                                                                                                                                  | PI3K inhibitor                                                                                          |
| staurosporine | trt_cp     | BRD-K17953061      | CDK2, GSK3B, CAMK2B, CDK1, CDK5, CHEK1, CHRM1, CHRM2, CHRM4, CSK, DAPK1, GPR35, IKBKB, ITK, LCK, LRRK2, MAP2K4, MAP2K6, MAPKAPK2, PAK2, PDPK1, PHKG2, PIK3CG, PIM1, PKN1, PRKACB, PRKCI, PRKCQ, RPS6KA1, STK3, SYK, TNIK, ZAP70 | PKC inhibitor                                                                                           |
| CD19          | trt_oe     | ccsbBroad304_00250 |                                                                                                                                                                                                                                 |                                                                                                         |
| CXCR2         | trt_oe     | ccsbBroad304_00856 |                                                                                                                                                                                                                                 |                                                                                                         |
| IL21R         | trt_oe     | ccsbBroad304_03148 |                                                                                                                                                                                                                                 |                                                                                                         |
| LCK           | trt_oe     | ccsbBroad304_13891 |                                                                                                                                                                                                                                 |                                                                                                         |
| PIK3CG        | trt_oe     | ccsbBroad304_06727 |                                                                                                                                                                                                                                 |                                                                                                         |
| BTK           | trt_oe     | ccsbBroad304_00180 |                                                                                                                                                                                                                                 |                                                                                                         |
| CSF3          | trt_oe     | ccsbBroad304_10489 |                                                                                                                                                                                                                                 |                                                                                                         |
| CTLA4         | trt_oe     | ccsbBroad304_00392 |                                                                                                                                                                                                                                 |                                                                                                         |
| CSF3          | trt_sh.cgs | CGS001-1440        |                                                                                                                                                                                                                                 |                                                                                                         |
| CTLA4         | trt_sh.cgs | CGS001-1493        |                                                                                                                                                                                                                                 |                                                                                                         |
| FLT3          | trt_sh.cgs | CGS001-2322        |                                                                                                                                                                                                                                 |                                                                                                         |
| CXCR2         | trt_sh.cgs | CGS001-3579        |                                                                                                                                                                                                                                 |                                                                                                         |

|           |            |               |                                                                                   |                                                                                                                                              |
|-----------|------------|---------------|-----------------------------------------------------------------------------------|----------------------------------------------------------------------------------------------------------------------------------------------|
| JAK3      | trt_sh.cgs | CGS001-3718   |                                                                                   |                                                                                                                                              |
| LCK       | trt_sh.cgs | CGS001-3932   |                                                                                   |                                                                                                                                              |
| PIK3CG    | trt_sh.cgs | CGS001-5294   |                                                                                   |                                                                                                                                              |
| TLR9      | trt_sh.cgs | CGS001-54106  |                                                                                   |                                                                                                                                              |
| NOD2      | trt_sh.cgs | CGS001-64127  |                                                                                   |                                                                                                                                              |
| BTK       | trt_sh.cgs | CGS001-695    |                                                                                   |                                                                                                                                              |
| CD19      | trt_sh.cgs | CGS001-930    |                                                                                   |                                                                                                                                              |
| AIM2      | trt_sh.cgs | CGS001-9447   |                                                                                   |                                                                                                                                              |
| AT-9283   | trt_cp     | BRD-K24576554 | AURKA, AURKB, ABL1, BCR, FLT3, JAK2, JAK3, RPS6KA6, STK17A                        | JAK inhibitor, Aurora kinase inhibitor, ABL inhibitor, BCR-ABL kinase inhibitor, FLT3 inhibitor, Mitotic inhibitor, Protein kinase inhibitor |
| ENMD-2076 | trt_cp     | BRD-K68488863 | AURKA, FLT3, KDR, PDGFRA, SRC, CSF1R, EPHA1, FGFR1, FGFR2, FGFR3, FLT4, KIT, PTK2 | FLT3 inhibitor, VEGFR inhibitor, Aurora kinase inhibitor                                                                                     |

---

Supplementary Table S8. Connectivity map analysis for GSE120622 LUAD

| Name               | Type   | Perturbagen Id | Target                                                                                   | MOA                                                                                                                                                                                                       |
|--------------------|--------|----------------|------------------------------------------------------------------------------------------|-----------------------------------------------------------------------------------------------------------------------------------------------------------------------------------------------------------|
| BW-B70C            | trt_cp | BRD-A55946879  | ALOX5                                                                                    | Lipoxygenase inhibitor                                                                                                                                                                                    |
| colforsin          | trt_cp | BRD-A55416093  | ADCY2, ADCY5, GNAS                                                                       | Adenylyl cyclase activator, Adenylate cyclase stimulant                                                                                                                                                   |
| diclofenac         | trt_cp | BRD-K08252256  | PTGS1, PTGS2, AKR1C3, ALOX5, ASIC1, ASIC3, CYP2C8, KCNQ2, KCNQ3, PLA2G2A, PPARG, SCN4A   | Cyclooxygenase inhibitor                                                                                                                                                                                  |
| diethylcarbamazine | trt_cp | BRD-K45542189  | ALOX5, PTGS1                                                                             | Lipoxygenase inhibitor                                                                                                                                                                                    |
| indoprofen         | trt_cp | BRD-A44090213  | PTGS1, PTGS2, CXCR1, CXCR2                                                               | Cyclooxygenase inhibitor, Prostanoid receptor antagonist                                                                                                                                                  |
| menadione          | trt_cp | BRD-K78126613  | AOX1, BGLAP, F10, F2, F7, F9, GGCX, NQO1, NQO2, PKM, PROC, PROS1, PROZ, VKORC1, VKORC1L1 | Mitochondrial DNA polymerase inhibitor, Phosphatase inhibitor                                                                                                                                             |
| rhamnetin          | trt_cp | BRD-K37206356  | ALOX5, MAPK8                                                                             | HDAC inhibitor                                                                                                                                                                                            |
| tricitiribine      | trt_cp | BRD-K80431395  | AKT1, AKT2, AKT3                                                                         | AKT inhibitor                                                                                                                                                                                             |
| rutin              | trt_cp | BRD-K20482099  | AKR1C3, AKR1B1, F10                                                                      | Antioxidant, Capillary stabilizing agent, Nitric oxide scavenger                                                                                                                                          |
| CDC                | trt_cp | BRD-K10870738  | ALOX12, ALOX5                                                                            | Lipoxygenase inhibitor                                                                                                                                                                                    |
| caffeic-acid       | trt_cp | BRD-K84709232  | ALOX5, MIF, RELA, TNF                                                                    | Lipoxygenase inhibitor, HIV integrase inhibitor, NFkB pathway inhibitor, Nitric oxide production inhibitor, PPAR receptor modulator, TNF production inhibitor, Tumor necrosis factor production inhibitor |



|                                 |        |               |                                                                                                                                                                     |                                                          |
|---------------------------------|--------|---------------|---------------------------------------------------------------------------------------------------------------------------------------------------------------------|----------------------------------------------------------|
| dextromethorphan                | trt_cp | BRD-K33211335 | SIGMAR1, CHRNA2, CHRNA3, CHRNA4, CHRNA7, CHRN2, CHRN4, CYBA, CYBB, CYP3A5, GRIN1, GRIN3A, NCF1, NCF2, NCF4, OPRD1, OPRK1, OPRM1, PGRMC1, RAC1, RAC2, SLC6A2, SLC6A4 | Glutamate receptor antagonist, Sigma receptor agonist    |
| GTP-14564                       | trt_cp | BRD-K16664969 | FLT3, CSF1R, KIT, PDGFRB                                                                                                                                            | FLT3 inhibitor, Tyrosine kinase inhibitor                |
| LFM-A13                         | trt_cp | BRD-A30655177 | BTK                                                                                                                                                                 | BTK inhibitor                                            |
| meclofenamic-acid               | trt_cp | BRD-K50398167 | PTGS1, PTGS2, ALOX5, CNR1, KCNQ2, KCNQ3                                                                                                                             | Cyclooxygenase inhibitor, Prostanoid receptor antagonist |
| PD-169316                       | trt_cp | BRD-K77133231 | ALOX5                                                                                                                                                               | p38 MAPK inhibitor                                       |
| REV-5901                        | trt_cp | BRD-A68281735 | ALOX5                                                                                                                                                               | Leukotriene receptor antagonist, Lipoxygenase inhibitor  |
| SB-202190                       | trt_cp | BRD-K54330070 | MAPK14, AKT1, ALOX5, CHEK1, GSK3B, LCK, MAPK1, MAPK11, MAPK12, MAPK8, PRKCA, ROCK1, RPS6KB1, SGK1                                                                   | p38 MAPK inhibitor                                       |
| SB-225002                       | trt_cp | BRD-K61323504 | CXCR2                                                                                                                                                               | CC chemokine receptor antagonist                         |
| SKF-86002                       | trt_cp | BRD-K96809896 | ALOX5, MAPK14                                                                                                                                                       | p38 MAPK inhibitor                                       |
| tenidap                         | trt_cp | BRD-A87479750 | ALOX5, KCNJ4, PTGS1                                                                                                                                                 | Cyclooxygenase inhibitor                                 |
| zileuton                        | trt_cp | BRD-A56359832 | ALOX5                                                                                                                                                               | Leukotriene inhibitor, Lipoxygenase inhibitor            |
| AKT-inhibitor-1-2               | trt_cp | BRD-K04887706 | AKT1, AKT2, AKT3                                                                                                                                                    | AKT inhibitor                                            |
| maraviroc                       | trt_cp | BRD-A04352665 | CCR5, CYP3A5                                                                                                                                                        | CC chemokine receptor antagonist                         |
| MK-2206                         | trt_cp | BRD-K68065987 | AKT1, AKT2, AKT3                                                                                                                                                    | AKT inhibitor                                            |
| quinine                         | trt_cp | BRD-U94846492 | KCNN4, ABCB1, CYP2D6, GP9, KCNB2, SLC29A4                                                                                                                           | Hemozoin biocrystallization inhibitor                    |
| forskolin                       | trt_cp | BRD-A70449690 | ADCY2, ADCY5, GNAS                                                                                                                                                  | Adenylyl cyclase activator                               |
| phorbol-12-myristate-13-acetate | trt_cp | BRD-A15079084 | CD4, KCNT2, PRKCA, TRPV4                                                                                                                                            | PKC activator                                            |

|               |        |               |                                                                                                |                                                                                                                               |
|---------------|--------|---------------|------------------------------------------------------------------------------------------------|-------------------------------------------------------------------------------------------------------------------------------|
| HG-6-64-01    | trt_cp | BRD-U37049823 | ABL1, BRAF, CSF1R, EGFR, FGFR1, FLT3, KIT, MAPK11, PDGFRB, RET                                 | RAF inhibitor                                                                                                                 |
| mesalazine    | trt_cp | BRD-K28849549 | PTGS1, PPARG, PTGS2, ALOX5, CHUK, CTNNB1, IKBKB, MPO, NAT1                                     | Cyclooxygenase inhibitor, Lipoxygenase inhibitor, Prostanoid receptor antagonist                                              |
| sirolimus     | trt_cp | BRD-K89626439 | MTOR, FKBP1A, CCR5, FGF2                                                                       | MTOR inhibitor                                                                                                                |
| dasatinib     | trt_cp | BRD-K49328571 | ABL1, FYN, LCK, SRC, KIT, YES1, BCR, EPHA2, LYN, PDGFRB, ABL2, BTK, DDR1, DDR2, PDGFRA, STAT5B | BCR-ABL kinase inhibitor, Ephrin inhibitor, KIT inhibitor, PDGFR receptor inhibitor, SRC inhibitor, Tyrosine kinase inhibitor |
| imatinib      | trt_cp | BRD-K92723993 | ABL1, KIT, PDGFRA, BCR, CSF1R, PDGFRB, ABCG2, CYP2C19, CYP2C8, CYP3A5, DDR1, NTRK1, RET        | BCR-ABL kinase inhibitor, KIT inhibitor, PDGFR receptor inhibitor                                                             |
| axitinib      | trt_cp | BRD-K29905972 | KDR, FLT1, FLT4, CSF1, CYP2C19, CYP3A5, KIT, PDGFRB, PLK4                                      | PDGFR receptor inhibitor, VEGFR inhibitor                                                                                     |
| lenalidomide  | trt_cp | BRD-K05926469 | CRBN, TNF, CDH5, PTGS2, TNFSF11                                                                | Antineoplastic                                                                                                                |
| tandutinib    | trt_cp | BRD-K89162000 | FLT3, KIT, PDGFRA, PDGFRB, CSF1R, PDGFD                                                        | FLT3 inhibitor, KIT inhibitor, PDGFR receptor inhibitor                                                                       |
| balsalazide   | trt_cp | BRD-K41410256 | PTGS1, PTGS2, ALOX5, PPARG                                                                     | Cyclooxygenase inhibitor                                                                                                      |
| honokiol      | trt_cp | BRD-K98493452 | ALOX5, PTGS1, PTGS2                                                                            | AKT inhibitor                                                                                                                 |
| sulfasalazine | trt_cp | BRD-K10670311 | PTGS1, PTGS2, ACAT1, ALOX5, CHUK, IKBKB, PLA2G1B, PPARG, SLC46A1, SLC7A11, TBXAS1              | Antirheumatic, NFkB pathway inhibitor                                                                                         |
| A-443644      | trt_cp | BRD-K38615104 | AKT1, AKT2, AKT3, CDC42BPB, GSK3B, PHKG1, PKIA, PRKACA                                         | AKT inhibitor                                                                                                                 |
| WZ-4-145      | trt_cp | BRD-U25771771 | CSF1R, DDR1, EGFR, PDGFRA, TIE1                                                                | EGFR inhibitor                                                                                                                |
| QL-X-138      | trt_cp | BRD-U33728988 | BTK, JAK3, MKNK2, MTOR, PRKDC                                                                  | MTOR inhibitor                                                                                                                |

|                    |        |               |                                                                                                                                                                                         |                                                                                                                                                                                  |
|--------------------|--------|---------------|-----------------------------------------------------------------------------------------------------------------------------------------------------------------------------------------|----------------------------------------------------------------------------------------------------------------------------------------------------------------------------------|
| QL-XII-47          | trt_cp | BRD-U86922168 | BMX, BTK                                                                                                                                                                                | BTK inhibitor,<br>Cytoplasmic tyrosine<br>protein kinase BMX<br>inhibitor                                                                                                        |
| GSK-3-inhibitor-IX | trt_cp | BRD-K04923131 | ALOX5, GSK3A, GSK3B                                                                                                                                                                     | Glycogen synthase<br>kinase inhibitor,<br>Lipoxygenase inhibitor                                                                                                                 |
| SB-203580          | trt_cp | BRD-K99291625 | MAPK14, MAPK1,<br>MAPK11, AKT1, ALOX5,<br>CHEK1, CYP2D6,<br>CYP3A4, GAK, GSK3B,<br>LCK, MAPK10,<br>MAPK12, MAPK8,<br>MAPK9, PRKCA, RAF1,<br>RIPK2, ROCK1,<br>RPS6KB1, SGK1, SRC,<br>TNF | p38 MAPK inhibitor                                                                                                                                                               |
| terreic-acid       | trt_cp | BRD-A64228451 | BTK                                                                                                                                                                                     | BTK inhibitor<br>Cyclooxygenase<br>inhibitor, Dopamine<br>uptake inhibitor,<br>Interleukin receptor<br>antagonist,<br>Lipoxygenase inhibitor,<br>Serotonin reuptake<br>inhibitor |
| hyperforin         | trt_cp | BRD-A80775386 | NR1I2, ALOX5, PTGS1,<br>TRPC6                                                                                                                                                           |                                                                                                                                                                                  |
| quizartinib        | trt_cp | BRD-K93918653 | FLT3, CSF1R, KIT, RET,<br>PDGFRA, PDGFRB                                                                                                                                                | FLT3 inhibitor                                                                                                                                                                   |
| linifanib          | trt_cp | BRD-K99749624 | CSF1R, KDR, PDGFRB,<br>FLT1, FLT3, FLT4, CSF1,<br>KIT, PDGFRA, RET, TEK                                                                                                                 | PDGFR receptor<br>inhibitor, VEGFR<br>inhibitor                                                                                                                                  |
| cediranib          | trt_cp | BRD-K86930074 | KDR, FLT1, FLT4, KIT,<br>PDGFRB, CSF1R, FLT3,<br>PDGFRA                                                                                                                                 | KIT inhibitor, VEGFR<br>inhibitor                                                                                                                                                |
| dovitinib          | trt_cp | BRD-K85402309 | EGFR, FGFR3, PDGFRB,<br>CSF1R, FGFR1, FGFR2,<br>FLT1, FLT3, FLT4, INSR,<br>KDR, KIT, PDGFRA                                                                                             | EGFR inhibitor, FLT3<br>inhibitor, FGFR<br>inhibitor, PDGFR<br>receptor inhibitor,<br>VEGFR inhibitor                                                                            |
| pazopanib          | trt_cp | BRD-K74514084 | KDR, KIT, FLT1, FLT4,<br>PDGFRB, PDGFRA,<br>BRAF, CSF1R, CYP2B6,<br>CYP2C8, CYP2E1, DDR2,<br>FGF1, FGFR1, FGFR3,<br>ITK, SH2B3                                                          | KIT inhibitor, PDGFR<br>receptor inhibitor,<br>VEGFR inhibitor                                                                                                                   |

|             |            |                    |                                                               |                                                                                                         |
|-------------|------------|--------------------|---------------------------------------------------------------|---------------------------------------------------------------------------------------------------------|
| sunitinib   | trt_cp     | BRD-M64432851      | FLT3, KDR, KIT, FLT4, FLT1, PDGFRA, PDGFRB, RET, CSF1R, FGFR1 | FLT3 inhibitor, KIT inhibitor, PDGFR receptor inhibitor, RET tyrosine kinase inhibitor, VEGFR inhibitor |
| sunitinib   | trt_cp     | BRD-K70511574      | FLT3, KDR, KIT, FLT4, FLT1, PDGFRA, PDGFRB, RET, CSF1R, FGFR1 | PLK inhibitor                                                                                           |
| vicriviroc  | trt_cp     | BRD-M72442222      | CCR5                                                          | CC chemokine receptor antagonist                                                                        |
| rivaroxaban | trt_cp     | BRD-K37130656      | F10, CYP2J2, CYP3A5                                           | Coagulation inhibitor                                                                                   |
| montelukast | trt_cp     | BRD-A31312900      | CYSLTR1, ALOX5, CYP2C8                                        | Leukotriene receptor antagonist                                                                         |
| AKT3        | trt_oe     | ccsbBroad304_07529 |                                                               |                                                                                                         |
| ARRB1       | trt_oe     | ccsbBroad304_00106 |                                                               |                                                                                                         |
| CD14        | trt_oe     | ccsbBroad304_00249 |                                                               |                                                                                                         |
| CXCR2       | trt_oe     | ccsbBroad304_00856 |                                                               |                                                                                                         |
| F10         | trt_oe     | ccsbBroad304_06188 |                                                               |                                                                                                         |
| F11         | trt_oe     | ccsbBroad304_00532 |                                                               |                                                                                                         |
| FCGR2A      | trt_oe     | ccsbBroad304_06198 |                                                               |                                                                                                         |
| GNAI2       | trt_oe     | ccsbBroad304_06292 |                                                               |                                                                                                         |
| GNGT2       | trt_oe     | ccsbBroad304_00661 |                                                               |                                                                                                         |
| HLA-DMB     | trt_oe     | ccsbBroad304_06370 |                                                               |                                                                                                         |
| BTK         | trt_oe     | ccsbBroad304_00180 |                                                               |                                                                                                         |
| FGR         | trt_oe     | ccsbBroad304_00564 |                                                               |                                                                                                         |
| CTLA4       | trt_oe     | ccsbBroad304_00392 |                                                               |                                                                                                         |
| AKT3        | trt_sh.cgs | CGS001-10000       |                                                               |                                                                                                         |
| CTLA4       | trt_sh.cgs | CGS001-1493        |                                                               |                                                                                                         |
| CFD         | trt_sh.cgs | CGS001-1675        |                                                               |                                                                                                         |
| EGR2        | trt_sh.cgs | CGS001-1959        |                                                               |                                                                                                         |
| F10         | trt_sh.cgs | CGS001-2159        |                                                               |                                                                                                         |
| F11         | trt_sh.cgs | CGS001-2160        |                                                               |                                                                                                         |
| FCGR2A      | trt_sh.cgs | CGS001-2212        |                                                               |                                                                                                         |
| GNAI2       | trt_sh.cgs | CGS001-2771        |                                                               |                                                                                                         |
| GNGT2       | trt_sh.cgs | CGS001-2793        |                                                               |                                                                                                         |
| GRK5        | trt_sh.cgs | CGS001-2869        |                                                               |                                                                                                         |
| HLA-DMB     | trt_sh.cgs | CGS001-3109        |                                                               |                                                                                                         |
| CXCR2       | trt_sh.cgs | CGS001-3579        |                                                               |                                                                                                         |
| ARRB1       | trt_sh.cgs | CGS001-408         |                                                               |                                                                                                         |
| CD99        | trt_sh.cgs | CGS001-4267        |                                                               |                                                                                                         |
| BTK         | trt_sh.cgs | CGS001-695         |                                                               |                                                                                                         |
| CD14        | trt_sh.cgs | CGS001-929         |                                                               |                                                                                                         |

|                    |        |                |                                                                                                                                                      |                                                                                                                                                         |
|--------------------|--------|----------------|------------------------------------------------------------------------------------------------------------------------------------------------------|---------------------------------------------------------------------------------------------------------------------------------------------------------|
| ENMD-2076          | trt_cp | BRD-K68488863  | AURKA, FLT3, KDR, PDGFRA, SRC, CSF1R, EPHA1, FGFR1, FGFR2, FGFR3, FLT4, KIT, PTK2                                                                    | FLT3 inhibitor, VEGFR inhibitor, Aurora kinase inhibitor                                                                                                |
| Name               | Type   | Perturbagen Id | Target                                                                                                                                               | MOA                                                                                                                                                     |
| BW-B70C            | trt_cp | BRD-A55946879  | ALOX5                                                                                                                                                | Lipoxygenase inhibitor                                                                                                                                  |
| CGP-57380          | trt_cp | BRD-K42500029  | AURKB, LCK, MKNK1, MKNK2, SGK1                                                                                                                       | MAP kinase inhibitor                                                                                                                                    |
| diclofenac         | trt_cp | BRD-K08252256  | PTGS1, PTGS2, AKR1C3, ALOX5, ASIC1, ASIC3, CYP2C8, KCNQ2, KCNQ3, PLA2G2A, PPARC, SCN4A                                                               | Cyclooxygenase inhibitor                                                                                                                                |
| diethylcarbamazine | trt_cp | BRD-K45542189  | ALOX5, PTGS1                                                                                                                                         | Lipoxygenase inhibitor                                                                                                                                  |
| dorsomorphin       | trt_cp | BRD-K54233340  | ACVR1, BMPR1A, BMPR1B, EPHA2, FKBP1A, FLT1, FLT3, KDR, LCK, MKNK1, PRKAA1, RPS6KA1, SRC                                                              | AMPK inhibitor                                                                                                                                          |
| indirubin          | trt_cp | BRD-K53959060  | CDK1, CDK5, CCNE1, CDK2, CDK4, CDK5R1, CDK9, GSK3A, GSK3B, LCK, LRRK1, LRRK2                                                                         | CDK inhibitor, Glycogen synthase kinase inhibitor, Leucine rich repeat kinase inhibitor, SRC inhibitor, Serum/glucocorticoid regulated kinase inhibitor |
| indirubin          | trt_cp | BRD-K19136521  | CDK1, CDK5, CCNE1, CDK2, CDK4, CDK5R1, CDK9, GSK3A, GSK3B, LCK, LRRK1, LRRK2                                                                         | CDK inhibitor                                                                                                                                           |
| LY-294002          | trt_cp | BRD-K27305650  | MTOR, PIK3CD, PIK3CG, PIK3CA, PIK3CB, PLK1, PRKDC, AKT1, CHEK1, GSK3B, LCK, MAPK1, MAPK11, MAPK12, MAPK14, MAPK8, PDE2A, PRKCA, ROCK1, RPS6KB1, SGK1 | MTOR inhibitor, PI3K inhibitor, DNA dependent protein kinase inhibitor, Phosphodiesterase inhibitor, PLK inhibitor                                      |
| menadione          | trt_cp | BRD-K78126613  | AOX1, BGLAP, F10, F2, F7, F9, GGCX, NQO1, NQO2, PKM, PROC, PROS1, PROZ, VKORC1, VKORC1L1                                                             | Mitochondrial DNA polymerase inhibitor, Phosphatase inhibitor                                                                                           |
| rhamnetin          | trt_cp | BRD-K37206356  | ALOX5, MAPK8                                                                                                                                         | HDAC inhibitor                                                                                                                                          |

|                        |        |               |                                                                                                                                                                       |                                                                                                                                                                                                           |
|------------------------|--------|---------------|-----------------------------------------------------------------------------------------------------------------------------------------------------------------------|-----------------------------------------------------------------------------------------------------------------------------------------------------------------------------------------------------------|
| bisindolylmaleimide-ix | trt_cp | BRD-K06543683 | SIRT1, AKT1, GSK3B, LCK, LRRK2, MAPK1, MAPK11, MAPK12, MAPK14, MAPK8, PRKCA, ROCK1, RPS6KB1, SIRT2                                                                    | CDK inhibitor, PKC inhibitor                                                                                                                                                                              |
| simvastatin            | trt_cp | BRD-A81772229 | HMGCR, CYP2C8, CYP3A4, CYP3A5, ITGB2                                                                                                                                  | HMGCR inhibitor                                                                                                                                                                                           |
| SRC-kinase-inhibitor-I | trt_cp | BRD-K50495309 | CSK, LCK, RIPK2                                                                                                                                                       | SRC inhibitor                                                                                                                                                                                             |
| tricitriline           | trt_cp | BRD-K80431395 | AKT1, AKT2, AKT3                                                                                                                                                      | AKT inhibitor                                                                                                                                                                                             |
| rutin                  | trt_cp | BRD-K20482099 | AKR1C3, AKR1B1, F10                                                                                                                                                   | Antioxidant, Capillary stabilizing agent, Nitric oxide scavenger                                                                                                                                          |
| tyrphostin-AG-82       | trt_cp | BRD-K03670461 | EGFR, LCK                                                                                                                                                             | EGFR inhibitor                                                                                                                                                                                            |
| aminogestrol           | trt_cp | BRD-K04976539 | LCK                                                                                                                                                                   | SRC inhibitor                                                                                                                                                                                             |
| CDC                    | trt_cp | BRD-K10870738 | ALOX12, ALOX5                                                                                                                                                         | Lipoxygenase inhibitor                                                                                                                                                                                    |
| CP-55940               | trt_cp | BRD-A03816571 | CNR1, CNR2, CXCR4, GPR55                                                                                                                                              | Cannabinoid receptor agonist                                                                                                                                                                              |
| caffeic-acid           | trt_cp | BRD-K84709232 | ALOX5, MIF, RELA, TNF                                                                                                                                                 | Lipoxygenase inhibitor, HIV integrase inhibitor, NFkB pathway inhibitor, Nitric oxide production inhibitor, PPAR receptor modulator, TNF production inhibitor, Tumor necrosis factor production inhibitor |
| dextromethorphan       | trt_cp | BRD-K33211335 | SIGMAR1, CHRNA2, CHRNA3, CHRNA4, CHRNA7, CHRNA2, CHRNA4, CYBA, CYBB, CYP3A5, GRIN1, GRIN3A, NCF1, NCF2, NCF4, OPRD1, OPRK1, OPRM1, PGRMC1, RAC1, RAC2, SLC6A2, SLC6A4 | Glutamate receptor antagonist, Sigma receptor agonist                                                                                                                                                     |
| GTP-14564              | trt_cp | BRD-K16664969 | FLT3, CSF1R, KIT, PDGFRB                                                                                                                                              | FLT3 inhibitor, Tyrosine kinase inhibitor                                                                                                                                                                 |
| KN-62                  | trt_cp | BRD-A81177136 | AKT1, CAMK2A, CHEK1, LCK, MAPK1, MAPK11, MAPK12, MAPK14, MAPK8, P2RX7, PRKCA, ROCK1, RPS6KB1, SGK1                                                                    | Calcium-calmodulin dependent protein kinase inhibitor, Purinergic receptor antagonist                                                                                                                     |

|                                 |        |               |                                                                                                                              |                                                          |
|---------------------------------|--------|---------------|------------------------------------------------------------------------------------------------------------------------------|----------------------------------------------------------|
| kenpaullone                     | trt_cp | BRD-K37312348 | GSK3B, CDK1, CDK5, CCNB1, CDK2, LCK                                                                                          | CDK inhibitor, Glycogen synthase kinase inhibitor        |
| lavendustin-a                   | trt_cp | BRD-K23583188 | EGFR, LCK                                                                                                                    | EGFR inhibitor                                           |
| LFM-A13                         | trt_cp | BRD-A30655177 | BTk                                                                                                                          | BTk inhibitor                                            |
| lovastatin                      | trt_cp | BRD-K09416995 | HMGCR, CYP3A5, HDAC2, ITGAL, NR1I2                                                                                           | HMGCR inhibitor                                          |
| meclofenamic-acid               | trt_cp | BRD-K50398167 | PTGS1, PTGS2, ALOX5, CNR1, KCNQ2, KCNQ3                                                                                      | Cyclooxygenase inhibitor, Prostanoid receptor antagonist |
| PD-169316                       | trt_cp | BRD-K77133231 | ALOX5                                                                                                                        | p38 MAPK inhibitor                                       |
| PD-98059                        | trt_cp | BRD-K62810658 | MAP2K1, AKT1, CHEK1, GSK3B, LCK, MAP2K2, MAPK1, MAPK11, MAPK12, MAPK14, MAPK3, MAPK8, PRKCA, RAF1, ROCK1, RPS6KB1, SGK1      | MEK inhibitor, MAP kinase inhibitor                      |
| PP-2                            | trt_cp | BRD-K95785537 | SRC, LCK, ABL1, LYN, RIPK2                                                                                                   | SRC inhibitor                                            |
| REV-5901                        | trt_cp | BRD-A68281735 | ALOX5                                                                                                                        | Leukotriene receptor antagonist, Lipoxigenase inhibitor  |
| SB-202190                       | trt_cp | BRD-K54330070 | MAPK14, AKT1, ALOX5, CHEK1, GSK3B, LCK, MAPK1, MAPK11, MAPK12, MAPK8, PRKCA, ROCK1, RPS6KB1, SGK1                            | p38 MAPK inhibitor                                       |
| SKF-86002                       | trt_cp | BRD-K96809896 | ALOX5, MAPK14 LYN, AURKB, AURKC, BRSK2, CALM1, CAMK2D, LCK, RET, SRC, YES1                                                   | p38 MAPK inhibitor                                       |
| SU-6656                         | trt_cp | BRD-K97354755 | CSNK2A1, AKT1, CHEK1, CSNK2A2, CSNK2B, GSK3B, LCK, MAP2K1, MAPK1, MAPK11, MAPK12, MAPK14, MAPK8, PRKCA, ROCK1, RPS6KB1, SGK1 | SRC inhibitor                                            |
| 4,5,6,7-tetrabromobenzotriazole | trt_cp | BRD-K97118047 | ALOX5, KCNJ4, PTGS1                                                                                                          | Casein kinase inhibitor                                  |
| tenidap                         | trt_cp | BRD-A87479750 | HPGDS, HRH1, IDO1, IFNG, IL10, IL2, IL4, SLC22A12, TGFB1, TNF, TRPV2                                                         | Cyclooxygenase inhibitor                                 |
| tranilast                       | trt_cp | BRD-K19533706 |                                                                                                                              | Angiogenesis inhibitor                                   |

|                                 |        |               |                                                                                                                                |                                                                                  |
|---------------------------------|--------|---------------|--------------------------------------------------------------------------------------------------------------------------------|----------------------------------------------------------------------------------|
| U-0126                          | trt_cp | BRD-K18787491 | AKT1, CHEK1, GSK3B, JAK2, LCK, MAP2K1, MAP2K2, MAP2K7, MAPK1, MAPK11, MAPK12, MAPK14, MAPK8, PRKCA, RAF1, ROCK1, RPS6KB1, SGK1 | MEK inhibitor                                                                    |
| M-3M3FBS                        | trt_cp | BRD-K09635314 | PLCB2, PLCB3, PLCD1, PLCG1, PLCG2                                                                                              | phospholipase activator                                                          |
| zileuton                        | trt_cp | BRD-A56359832 | ALOX5                                                                                                                          | Leukotriene inhibitor, Lipoxygenase inhibitor                                    |
| AKT-inhibitor-1-2               | trt_cp | BRD-K04887706 | AKT1, AKT2, AKT3                                                                                                               | AKT inhibitor                                                                    |
| BMS-536924                      | trt_cp | BRD-K34581968 | IGF1R, AKT1, CCNE1, CDK2, CYP3A4, ERBB2, INSR, KDR, LCK, MAPK1, MET, PDGFRA, PDGFRB                                            | IGF-1 inhibitor                                                                  |
| maraviroc                       | trt_cp | BRD-A04352665 | CCR5, CYP3A5                                                                                                                   | CC chemokine receptor antagonist                                                 |
| MK-2206                         | trt_cp | BRD-K68065987 | AKT1, AKT2, AKT3                                                                                                               | AKT inhibitor                                                                    |
| NF-449                          | trt_cp | BRD-K36324071 | P2RX1                                                                                                                          | Purinergic receptor antagonist                                                   |
| quinine                         | trt_cp | BRD-U94846492 | KCNN4, ABCB1, CYP2D6, GP9, KCNB2, SLC29A4                                                                                      | Hemozoin biocrystallization inhibitor                                            |
| phorbol-12-myristate-13-acetate | trt_cp | BRD-A15079084 | CD4, KCNT2, PRKCA, TRPV4                                                                                                       | PKC activator                                                                    |
| givinostat                      | trt_cp | BRD-K13810148 | HDAC2, HDAC1, HDAC3, HDAC4, HDAC5, HDAC6, HDAC7, HDAC8, HDAC9, IL1B, IL1R2, IL6R, TNF                                          | HDAC inhibitor                                                                   |
| HG-6-64-01                      | trt_cp | BRD-U37049823 | ABL1, BRAF, CSF1R, EGFR, FGFR1, FLT3, KIT, MAPK11, PDGFRB, RET                                                                 | RAF inhibitor                                                                    |
| JW-7-24-1                       | trt_cp | BRD-U68942961 | LCK                                                                                                                            | LCK Inhibitor                                                                    |
| NM-PP1                          | trt_cp | BRD-K78278890 | CAMK2A, LCK, MAPK8, PRKACA, RIPK2, SRC                                                                                         | Mutant kinase inhibitor                                                          |
| mesalazine                      | trt_cp | BRD-K28849549 | PTGS1, PPARG, PTGS2, ALOX5, CHUK, CTNNB1, IKBKB, MPO, NAT1                                                                     | Cyclooxygenase inhibitor, Lipoxygenase inhibitor, Prostanoid receptor antagonist |
| sirolimus                       | trt_cp | BRD-K89626439 | MTOR, FKBP1A, CCR5, FGF2                                                                                                       | MTOR inhibitor                                                                   |



|               |        |               |                                                                                                |                                                                                                                               |
|---------------|--------|---------------|------------------------------------------------------------------------------------------------|-------------------------------------------------------------------------------------------------------------------------------|
| tozasertib    | trt_cp | BRD-K59369769 | AURKA, AURKB, ABL1, AURKC, BCR, FLT3, JAK2, DDR2, LCK                                          | Aurora kinase inhibitor, BCR-ABL kinase inhibitor, FLT3 inhibitor, JAK inhibitor                                              |
| dasatinib     | trt_cp | BRD-K49328571 | ABL1, FYN, LCK, SRC, KIT, YES1, BCR, EPHA2, LYN, PDGFRB, ABL2, BTK, DDR1, DDR2, PDGFRA, STAT5B | BCR-ABL kinase inhibitor, Ephrin inhibitor, KIT inhibitor, PDGFR receptor inhibitor, SRC inhibitor, Tyrosine kinase inhibitor |
| imatinib      | trt_cp | BRD-K92723993 | ABL1, KIT, PDGFRA, BCR, CSF1R, PDGFRB, ABCG2, CYP2C19, CYP2C8, CYP3A5, DDR1, NTRK1, RET        | BCR-ABL kinase inhibitor, KIT inhibitor, PDGFR receptor inhibitor                                                             |
| axitinib      | trt_cp | BRD-K29905972 | KDR, FLT1, FLT4, CSF1, CYP2C19, CYP3A5, KIT, PDGFRB, PLK4                                      | PDGFR receptor inhibitor, VEGFR inhibitor                                                                                     |
| saracatinib   | trt_cp | BRD-K19540840 | SRC, ABL1, LCK, YES1                                                                           | SRC inhibitor                                                                                                                 |
| lenalidomide  | trt_cp | BRD-K05926469 | CRBN, TNF, CDH5, PTGS2, TNFSF11                                                                | Antineoplastic                                                                                                                |
| tandutinib    | trt_cp | BRD-K89162000 | FLT3, KIT, PDGFRA, PDGFRB, CSF1R, PDGFD                                                        | FLT3 inhibitor, KIT inhibitor, PDGFR receptor inhibitor                                                                       |
| balsalazide   | trt_cp | BRD-K41410256 | PTGS1, PTGS2, ALOX5, PPARG                                                                     | Cyclooxygenase inhibitor                                                                                                      |
| honokiol      | trt_cp | BRD-K98493452 | ALOX5, PTGS1, PTGS2                                                                            | AKT inhibitor                                                                                                                 |
| sulfasalazine | trt_cp | BRD-K10670311 | PTGS1, PTGS2, ACAT1, ALOX5, CHUK, IKBKB, PLA2G1B, PPARG, SLC46A1, SLC7A11, TBXAS1              | Antirheumatic, NFkB pathway inhibitor                                                                                         |
| A-443644      | trt_cp | BRD-K38615104 | AKT1, AKT2, AKT3, CDC42BPB, GSK3B, PHKG1, PKIA, PRKACA                                         | AKT inhibitor                                                                                                                 |
| WZ-4-145      | trt_cp | BRD-U25771771 | CSF1R, DDR1, EGFR, PDGFRA, TIE1                                                                | EGFR inhibitor                                                                                                                |
| QL-X-138      | trt_cp | BRD-U33728988 | BTK, JAK3, MKNK2, MTOR, PRKDC                                                                  | MTOR inhibitor                                                                                                                |
| WH-4023       | trt_cp | BRD-U44618005 | ABL1, LCK, SRC                                                                                 | SRC inhibitor<br>BTK inhibitor,                                                                                               |
| QL-XII-47     | trt_cp | BRD-U86922168 | BMX, BTK                                                                                       | Cytoplasmic tyrosine protein kinase BMX inhibitor                                                                             |

|                    |        |               |                                                                                                                                                              |                                                                                                                                            |
|--------------------|--------|---------------|--------------------------------------------------------------------------------------------------------------------------------------------------------------|--------------------------------------------------------------------------------------------------------------------------------------------|
| GSK-3-inhibitor-IX | trt_cp | BRD-K04923131 | ALOX5, GSK3A, GSK3B                                                                                                                                          | Glycogen synthase kinase inhibitor, Lipoxygenase inhibitor                                                                                 |
| SB-203580          | trt_cp | BRD-K99291625 | MAPK14, MAPK1, MAPK11, AKT1, ALOX5, CHEK1, CYP2D6, CYP3A4, GAK, GSK3B, LCK, MAPK10, MAPK12, MAPK8, MAPK9, PRKCA, RAF1, RIPK2, ROCK1, RPS6KB1, SGK1, SRC, TNF | p38 MAPK inhibitor                                                                                                                         |
| terreic-acid       | trt_cp | BRD-A64228451 | BTK                                                                                                                                                          | BTK inhibitor                                                                                                                              |
| hyperforin         | trt_cp | BRD-A80775386 | NR1I2, ALOX5, PTGS1, TRPC6                                                                                                                                   | Cyclooxygenase inhibitor, Dopamine uptake inhibitor, Interleukin receptor antagonist, Lipoxygenase inhibitor, Serotonin reuptake inhibitor |
| quizartinib        | trt_cp | BRD-K93918653 | FLT3, CSF1R, KIT, RET, PDGFRA, PDGFRB                                                                                                                        | FLT3 inhibitor                                                                                                                             |
| linifanib          | trt_cp | BRD-K99749624 | CSF1R, KDR, PDGFRB, FLT1, FLT3, FLT4, CSF1, KIT, PDGFRA, RET, TEK                                                                                            | PDGFR receptor inhibitor, VEGFR inhibitor                                                                                                  |
| cediranib          | trt_cp | BRD-K86930074 | KDR, FLT1, FLT4, KIT, PDGFRB, CSF1R, FLT3, PDGFRA                                                                                                            | KIT inhibitor, VEGFR inhibitor                                                                                                             |
| dovitinib          | trt_cp | BRD-K85402309 | EGFR, FGFR3, PDGFRB, CSF1R, FGFR1, FGFR2, FLT1, FLT3, FLT4, INSR, KDR, KIT, PDGFRA                                                                           | EGFR inhibitor, FLT3 inhibitor, FGFR inhibitor, PDGFR receptor inhibitor, VEGFR inhibitor                                                  |
| pazopanib          | trt_cp | BRD-K74514084 | KDR, KIT, FLT1, FLT4, PDGFRB, PDGFRA, BRAF, CSF1R, CYP2B6, CYP2C8, CYP2E1, DDR2, FGF1, FGFR1, FGFR3, ITK, SH2B3                                              | KIT inhibitor, PDGFR receptor inhibitor, VEGFR inhibitor                                                                                   |
| sunitinib          | trt_cp | BRD-M64432851 | FLT3, KDR, KIT, FLT4, FLT1, PDGFRA, PDGFRB, RET, CSF1R, FGFR1                                                                                                | FLT3 inhibitor, KIT inhibitor, PDGFR receptor inhibitor, RET tyrosine kinase inhibitor, VEGFR inhibitor                                    |

|               |        |                    |                                                                                                                                                                                                                                 |                                            |
|---------------|--------|--------------------|---------------------------------------------------------------------------------------------------------------------------------------------------------------------------------------------------------------------------------|--------------------------------------------|
| sunitinib     | trt_cp | BRD-K70511574      | FLT3, KDR, KIT, FLT4, FLT1, PDGFRA, PDGFRB, RET, CSF1R, FGFR1                                                                                                                                                                   | PLK inhibitor                              |
| vicriviroc    | trt_cp | BRD-M72442222      | CCR5                                                                                                                                                                                                                            | CC chemokine receptor antagonist           |
| rivaroxaban   | trt_cp | BRD-K37130656      | F10, CYP2J2, CYP3A5                                                                                                                                                                                                             | Coagulation inhibitor                      |
| montelukast   | trt_cp | BRD-A31312900      | CYSLTR1, ALOX5, CYP2C8                                                                                                                                                                                                          | Leukotriene receptor antagonist            |
| staurosporine | trt_cp | BRD-K17953061      | CDK2, GSK3B, CAMK2B, CDK1, CDK5, CHEK1, CHRM1, CHRM2, CHRM4, CSK, DAPK1, GPR35, IKBKB, ITK, LCK, LRRK2, MAP2K4, MAP2K6, MAPKAPK2, PAK2, PDPK1, PHKG2, PIK3CG, PIM1, PKN1, PRKACB, PRKCI, PRKCQ, RPS6KA1, STK3, SYK, TNIK, ZAP70 | PKC inhibitor                              |
| ataluren      | trt_cp | BRD-K94830329      | CFTR, DMD, F8, F9                                                                                                                                                                                                               | CFTR channel agonist, Dystrophin stimulant |
| AKT3          | trt_oe | ccsbBroad304_07529 |                                                                                                                                                                                                                                 |                                            |
| ARRB1         | trt_oe | ccsbBroad304_00106 |                                                                                                                                                                                                                                 |                                            |
| CD14          | trt_oe | ccsbBroad304_00249 |                                                                                                                                                                                                                                 |                                            |
| CXCR4         | trt_oe | ccsbBroad304_01835 |                                                                                                                                                                                                                                 |                                            |
| F10           | trt_oe | ccsbBroad304_06188 |                                                                                                                                                                                                                                 |                                            |
| F11           | trt_oe | ccsbBroad304_00532 |                                                                                                                                                                                                                                 |                                            |
| FCGR2A        | trt_oe | ccsbBroad304_06198 |                                                                                                                                                                                                                                 |                                            |
| GNAI2         | trt_oe | ccsbBroad304_06292 |                                                                                                                                                                                                                                 |                                            |
| GNGT2         | trt_oe | ccsbBroad304_00661 |                                                                                                                                                                                                                                 |                                            |
| GRK6          | trt_oe | ccsbBroad304_00682 |                                                                                                                                                                                                                                 |                                            |
| HLA-DMB       | trt_oe | ccsbBroad304_06370 |                                                                                                                                                                                                                                 |                                            |
| IL7R          | trt_oe | ccsbBroad304_00853 |                                                                                                                                                                                                                                 |                                            |
| ITGB2         | trt_oe | ccsbBroad304_06464 |                                                                                                                                                                                                                                 |                                            |
| LCK           | trt_oe | ccsbBroad304_13891 |                                                                                                                                                                                                                                 |                                            |
| LSP1          | trt_oe | ccsbBroad304_06538 |                                                                                                                                                                                                                                 |                                            |
| MAP3K8        | trt_oe | ccsbBroad304_00348 |                                                                                                                                                                                                                                 |                                            |
| NCF2          | trt_oe | ccsbBroad304_06619 |                                                                                                                                                                                                                                 |                                            |
| PLCG2         | trt_oe | ccsbBroad304_06736 |                                                                                                                                                                                                                                 |                                            |
| BTK           | trt_oe | ccsbBroad304_00180 |                                                                                                                                                                                                                                 |                                            |
| FGR           | trt_oe | ccsbBroad304_00564 |                                                                                                                                                                                                                                 |                                            |
| EGR3          | trt_oe | ccsbBroad304_00488 |                                                                                                                                                                                                                                 |                                            |
| IL4           | trt_oe | ccsbBroad304_00849 |                                                                                                                                                                                                                                 |                                            |

|         |            |                    |
|---------|------------|--------------------|
| IL6R    | trt_oe     | ccsbBroad304_00851 |
| AKT3    | trt_sh.cgs | CGS001-10000       |
| MAP3K8  | trt_sh.cgs | CGS001-1326        |
| CFD     | trt_sh.cgs | CGS001-1675        |
| EGR2    | trt_sh.cgs | CGS001-1959        |
| EGR3    | trt_sh.cgs | CGS001-1960        |
| F10     | trt_sh.cgs | CGS001-2159        |
| F11     | trt_sh.cgs | CGS001-2160        |
| FCGR2A  | trt_sh.cgs | CGS001-2212        |
| GNAI2   | trt_sh.cgs | CGS001-2771        |
| GNGT2   | trt_sh.cgs | CGS001-2793        |
| GRK5    | trt_sh.cgs | CGS001-2869        |
| GRK6    | trt_sh.cgs | CGS001-2870        |
| HLA-DMA | trt_sh.cgs | CGS001-3108        |
| HLA-DMB | trt_sh.cgs | CGS001-3109        |
| IL4     | trt_sh.cgs | CGS001-3565        |
| IL6R    | trt_sh.cgs | CGS001-3570        |
| IL7R    | trt_sh.cgs | CGS001-3575        |
| IL11    | trt_sh.cgs | CGS001-3589        |
| ITGB2   | trt_sh.cgs | CGS001-3689        |
| LCK     | trt_sh.cgs | CGS001-3932        |
| LSP1    | trt_sh.cgs | CGS001-4046        |
| ARRB1   | trt_sh.cgs | CGS001-408         |
| CD99    | trt_sh.cgs | CGS001-4267        |
| NCF2    | trt_sh.cgs | CGS001-4688        |
| PLCG2   | trt_sh.cgs | CGS001-5336        |
| NOD2    | trt_sh.cgs | CGS001-64127       |
| BTK     | trt_sh.cgs | CGS001-695         |
| CXCR4   | trt_sh.cgs | CGS001-7852        |
| CD14    | trt_sh.cgs | CGS001-929         |

|                     |        |                |                                                                                   |                                                          |
|---------------------|--------|----------------|-----------------------------------------------------------------------------------|----------------------------------------------------------|
| ENMD-2076           | trt_cp | BRD-K68488863  | AURKA, FLT3, KDR, PDGFRA, SRC, CSF1R, EPHA1, FGFR1, FGFR2, FGFR3, FLT4, KIT, PTK2 | FLT3 inhibitor, VEGFR inhibitor, Aurora kinase inhibitor |
| Name                | Type   | Perturbagen Id | Target                                                                            | MOA                                                      |
| BMY-45778           | trt_cp | BRD-K84895041  | PTGIR                                                                             | IP1 prostacyclin receptor agonist                        |
| BW-B70C             | trt_cp | BRD-A55946879  | ALOX5                                                                             | Lipoxygenase inhibitor                                   |
| bisindolylmaleimide | trt_cp | BRD-K49448285  | CCND1, CDK4, LRRK2, PDPK1, PIM1, PRKCA, PRKCB, PRKCI, PRKCZ                       | CDK inhibitor                                            |

|                    |        |               |                                                                                                                                  |                                                                            |
|--------------------|--------|---------------|----------------------------------------------------------------------------------------------------------------------------------|----------------------------------------------------------------------------|
| diclofenac         | trt_cp | BRD-K08252256 | PTGS1, PTGS2, AKR1C3, ALOX5, ASIC1, ASIC3, CYP2C8, KCNQ2, KCNQ3, PLA2G2A, PPARG, SCN4A                                           | Cyclooxygenase inhibitor                                                   |
| diethylcarbamazine | trt_cp | BRD-K45542189 | ALOX5, PTGS1                                                                                                                     | Lipoxygenase inhibitor                                                     |
| dephostatin        | trt_cp | BRD-K60274257 | PTPN1, PTPN6                                                                                                                     | Tyrosine phosphatase inhibitor                                             |
| dorsomorphin       | trt_cp | BRD-K54233340 | ACVR1, BMPR1A, BMPR1B, EPHA2, FKBP1A, FLT1, FLT3, KDR, LCK, MKNK1, PRKAA1, RPS6KA1, SRC                                          | AMPK inhibitor                                                             |
| ibuprofen          | trt_cp | BRD-A17655518 | PTGS2, PTGS1, ASIC1, BCL2, CFTR, CYP2C8, FABP2, PLAT, PPARG, SLC5A8, THBD                                                        | Cyclooxygenase inhibitor, NFkB pathway inhibitor                           |
| nicotine           | trt_cp | BRD-K05395900 | CHRNA10, CHRNA9, AOX1, CHAT, CHRNA2, CHRNA3, CHRNA4, CHRNA5, CHRNA6, CHRNA7, CHRN2, CHRN3, CHRN4, CYP19A1, CYP2B6, TBXAS1, TRPA1 | Acetylcholine receptor agonist                                             |
| paclitaxel         | trt_cp | BRD-A28746609 | TUBB, NR1I2, ABCB1, BCL2, CYP2C8, MAP2, MAP4, MAPT, TLR4, TUBB1                                                                  | Tubulin inhibitor                                                          |
| rhamnetin          | trt_cp | BRD-K37206356 | ALOX5, MAPK8                                                                                                                     | HDAC inhibitor                                                             |
| SKF-96365          | trt_cp | BRD-A72703248 | CYP3A4, TRPC1, PKD2, TRPC3, TRPC4, TRPC5, TRPV2                                                                                  | Calcium channel blocker                                                    |
| simvastatin        | trt_cp | BRD-A81772229 | HMGCR, CYP2C8, CYP3A4, CYP3A5, ITGB2                                                                                             | HMGCR inhibitor                                                            |
| TCS-359            | trt_cp | BRD-K81376179 | FLT3                                                                                                                             | FLT3 inhibitor                                                             |
| tamoxifen          | trt_cp | BRD-K04210847 | ESR1, ESR2, CYP3A5, EBP, GPER1, PRKCA, PRKCB, PRKCD, PRKCE, PRKCG, PRKCI, PRKCQ, PRKCZ                                           | Estrogen receptor antagonist, Selective estrogen receptor modulator (SERM) |
| trequinsin         | trt_cp | BRD-K84663978 | PDE4A, PDE4B, PDE4C, PDE4D, PDE5A, PTGIR                                                                                         | Phosphodiesterase inhibitor                                                |
| Y-27632            | trt_cp | BRD-K44084986 | ROCK1, ROCK2, LRRK2, PKIA, PKN2, PRKACA, PRKCE                                                                                   | Rho associated kinase inhibitor                                            |
| tyrphostin-AG-1296 | trt_cp | BRD-K76064317 | FLT3                                                                                                                             | FLT3 inhibitor                                                             |

|                      |        |               |                                                                                                                                                                     |                                                                                                                                                                                                           |
|----------------------|--------|---------------|---------------------------------------------------------------------------------------------------------------------------------------------------------------------|-----------------------------------------------------------------------------------------------------------------------------------------------------------------------------------------------------------|
| prostaglandin-e1     | trt_cp | BRD-K52459643 | PTGER1, PTGER2, CATSPER1, CATSPER2, CATSPER3, CATSPER4, PTGDR, PTGER4, PTGIR                                                                                        | Prostanoid receptor agonist                                                                                                                                                                               |
| amiloride            | trt_cp | BRD-K97181089 | SCNN1A, ASIC1, ASIC2, SCNN1B, SCNN1G, AOC1, ASIC3, PKD2, PKD2L1, PLAU, SCNN1D, SLC9A1, TRPC7, TRPV2                                                                 | Sodium channel blocker                                                                                                                                                                                    |
| carbacyclin          | trt_cp | BRD-K27499107 | PPARD, PTGDR, PTGER1, PTGER2, PTGER3, PTGER4, PTGFR, PTGIR, TBXA2R                                                                                                  | IP receptor activator, PPAR receptor agonist                                                                                                                                                              |
| CDC                  | trt_cp | BRD-K10870738 | ALOX12, ALOX5                                                                                                                                                       | Lipoxygenase inhibitor                                                                                                                                                                                    |
| CGP-53353            | trt_cp | BRD-K32292990 | EGFR, PRKCB                                                                                                                                                         | EGFR inhibitor, PKC inhibitor                                                                                                                                                                             |
| caffeic-acid         | trt_cp | BRD-K84709232 | ALOX5, MIF, RELA, TNF                                                                                                                                               | Lipoxygenase inhibitor, HIV integrase inhibitor, NFkB pathway inhibitor, Nitric oxide production inhibitor, PPAR receptor modulator, TNF production inhibitor, Tumor necrosis factor production inhibitor |
| dextromethorphan     | trt_cp | BRD-K33211335 | SIGMAR1, CHRNA2, CHRNA3, CHRNA4, CHRNA7, CHRN2, CHRN4, CYBA, CYBB, CYP3A5, GRIN1, GRIN3A, NCF1, NCF2, NCF4, OPRD1, OPRK1, OPRM1, PGRMC1, RAC1, RAC2, SLC6A2, SLC6A4 | Glutamate receptor antagonist, Sigma receptor agonist                                                                                                                                                     |
| gamma-linolenic-acid | trt_cp | BRD-K18059238 | TBXAS1                                                                                                                                                              | Cyclooxygenase inhibitor, Prostanoid receptor agonist                                                                                                                                                     |
| GTP-14564            | trt_cp | BRD-K16664969 | FLT3, CSF1R, KIT, PDGFRB                                                                                                                                            | FLT3 inhibitor, Tyrosine kinase inhibitor                                                                                                                                                                 |
| hispidin             | trt_cp | BRD-K07325606 | PREP, PRKCB, PTGS2, XDH                                                                                                                                             | PKC inhibitor                                                                                                                                                                                             |
| ibudilast            | trt_cp | BRD-K16444452 | PDE4A, PDE4B, PDE4C, MIF, PDE10A, PDE3A, PDE4D, TLR4, CYSLTR1, IL1B, IL6, PDE11A, PDE5A                                                                             | Leukotriene receptor antagonist, Phosphodiesterase inhibitor                                                                                                                                              |

|                   |        |               |                                                                                                   |                                                                 |
|-------------------|--------|---------------|---------------------------------------------------------------------------------------------------|-----------------------------------------------------------------|
| LFM-A13           | trt_cp | BRD-A30655177 | BTK                                                                                               | BTK inhibitor                                                   |
| lovastatin        | trt_cp | BRD-K09416995 | HMGCR, CYP3A5, HDAC2, ITGAL, NR1I2                                                                | HMGCR inhibitor                                                 |
| meclofenamic-acid | trt_cp | BRD-K50398167 | PTGS1, PTGS2, ALOX5, CNR1, KCNQ2, KCNQ3                                                           | Cyclooxygenase inhibitor, Prostanoid receptor antagonist        |
| naloxone          | trt_cp | BRD-A41833852 | OPRM1, OPRK1, OPRD1, CREB1, ESR1, TLR4                                                            | Opioid receptor antagonist                                      |
| ozagrel           | trt_cp | BRD-K19525698 | TBXAS1                                                                                            | Thromboxane synthase inhibitor                                  |
| PD-169316         | trt_cp | BRD-K77133231 | ALOX5                                                                                             | p38 MAPK inhibitor                                              |
| D-64406           | trt_cp | BRD-K27665173 | FLT3, PDGFRA, PDGFRB                                                                              | PDGFR receptor inhibitor                                        |
| midostaurin       | trt_cp | BRD-K13646352 | FLT3, KIT, CCNB1, FLT1, KDR, PDGFRB, PRKCA, PRKCG, VEGFA                                          | FLT3 inhibitor, KIT inhibitor, PKC inhibitor                    |
| probenecid        | trt_cp | BRD-K95237249 | SLC22A6, ABCC1, PANX1, SLC22A11, SLC22A8, SLCO1C1, TRPV2                                          | Uricosuric blocker                                              |
| picotamide        | trt_cp | BRD-K67277431 | TBXA2R, TBXAS1                                                                                    | Thromboxane receptor antagonist, Thromboxane synthase inhibitor |
| REV-5901          | trt_cp | BRD-A68281735 | ALOX5                                                                                             | Leukotriene receptor antagonist, Lipoxygenase inhibitor         |
| ibuprofen         | trt_cp | BRD-K14965640 | PTGS2, PTGS1, ASIC1, BCL2, CFTR, CYP2C8, FABP2, PLAT, PPARG, SLC5A8, THBD                         | Cyclooxygenase inhibitor                                        |
| SB-202190         | trt_cp | BRD-K54330070 | MAPK14, AKT1, ALOX5, CHEK1, GSK3B, LCK, MAPK1, MAPK11, MAPK12, MAPK8, PRKCA, ROCK1, RPS6KB1, SGK1 | p38 MAPK inhibitor                                              |
| SKF-86002         | trt_cp | BRD-K96809896 | ALOX5, MAPK14                                                                                     | p38 MAPK inhibitor                                              |
| semaxanib         | trt_cp | BRD-K63504947 | KDR, FLT1, KIT, PDGFRB, FGFR1, FLT3, MET, PDGFRA, RET                                             | VEGFR inhibitor                                                 |
| tenidap           | trt_cp | BRD-A87479750 | ALOX5, KCNJ4, PTGS1                                                                               | Cyclooxygenase inhibitor                                        |
| tranilast         | trt_cp | BRD-K19533706 | HPGDS, HRH1, IDO1, IFNG, IL10, IL2, IL4, SLC22A12, TGFB1, TNF, TRPV2                              | Angiogenesis inhibitor                                          |

|                                 |        |               |                                                                                               |                                                                                  |
|---------------------------------|--------|---------------|-----------------------------------------------------------------------------------------------|----------------------------------------------------------------------------------|
| U-46619                         | trt_cp | BRD-K18757346 | PTGDR, PTGDR2, PTGER1, PTGER2, PTGER3, PTGER4, PTGFR, PTGIR, TBXA2R                           | Thromboxane receptor agonist                                                     |
| M-3M3FBS                        | trt_cp | BRD-K09635314 | PLCB2, PLCB3, PLCD1, PLCG1, PLCG2                                                             | phospholipase activator                                                          |
| zileuton                        | trt_cp | BRD-A56359832 | ALOX5                                                                                         | Leukotriene inhibitor, Lipoxygenase inhibitor                                    |
| imiquimod                       | trt_cp | BRD-K26657438 | TLR7, TLR8                                                                                    | TLR agonist, Interferon inducer                                                  |
| ingenol                         | trt_cp | BRD-A52650764 | PRKCD, PRKCE                                                                                  | PKC activator                                                                    |
| PKCbeta-inhibitor               | trt_cp | BRD-K89687904 | PRKCB                                                                                         | PKC inhibitor                                                                    |
| quinine                         | trt_cp | BRD-U94846492 | KCNN4, ABCB1, CYP2D6, GP9, KCNB2, SLC29A4                                                     | Hemozoin biocrystallization inhibitor                                            |
| fostamatinib                    | trt_cp | BRD-K20285085 | SYK, FLT3, RET                                                                                | SYK inhibitor                                                                    |
| TG-101348                       | trt_cp | BRD-K12502280 | JAK2, FLT3, BRD4, JAK1, JAK3, RET, TYK2                                                       | FLT3 inhibitor, JAK inhibitor                                                    |
| phorbol-12-myristate-13-acetate | trt_cp | BRD-A15079084 | CD4, KCNT2, PRKCA, TRPV4                                                                      | PKC activator                                                                    |
| HG-6-64-01                      | trt_cp | BRD-U37049823 | ABL1, BRAF, CSF1R, EGFR, FGFR1, FLT3, KIT, MAPK11, PDGFRB, RET                                | RAF inhibitor                                                                    |
| treprostinil                    | trt_cp | BRD-A67438293 | PTGIR, CYP2C8, P2RY12, PPARD, PTGDR, PTGER1, PTGER2, PTGER3, PTGER4                           | Prostacyclin analog                                                              |
| iloprost                        | trt_cp | BRD-A45664787 | PTGIR, PTGER1, PTGER2, PDE4A, PDE4B, PDE4C, PDE4D, PLAT, PTGDR, PTGER3, PTGER4, PTGFR, TBXA2R | Platelet aggregation inhibitor, Prostanoid receptor agonist                      |
| mesalazine                      | trt_cp | BRD-K28849549 | PTGS1, PPARG, PTGS2, ALOX5, CHUK, CTNNB1, IKBKB, MPO, NAT1                                    | Cyclooxygenase inhibitor, Lipoxygenase inhibitor, Prostanoid receptor antagonist |
| tozasertib                      | trt_cp | BRD-K59369769 | AURKA, AURKB, ABL1, AURKC, BCR, FLT3, JAK2, DDR2, LCK                                         | Aurora kinase inhibitor, BCR-ABL kinase inhibitor, FLT3 inhibitor, JAK inhibitor |



|                    |        |               |                                                                                                                                                              |                                                                                                                               |
|--------------------|--------|---------------|--------------------------------------------------------------------------------------------------------------------------------------------------------------|-------------------------------------------------------------------------------------------------------------------------------|
| dasatinib          | trt_cp | BRD-K49328571 | ABL1, FYN, LCK, SRC, KIT, YES1, BCR, EPHA2, LYN, PDGFRB, ABL2, BTK, DDR1, DDR2, PDGFRA, STAT5B                                                               | BCR-ABL kinase inhibitor, Ephrin inhibitor, KIT inhibitor, PDGFR receptor inhibitor, SRC inhibitor, Tyrosine kinase inhibitor |
| sorafenib          | trt_cp | BRD-K49810818 | RET, BRAF, FLT3, KDR, RAF1, FLT1, FLT4, KIT, DDR2, FGFR1, PDGFRB, CYP2B6, CYP2C8, CYP3A5, PDGFB, SLCO1B3                                                     | FLT3 inhibitor, KIT inhibitor, PDGFR receptor inhibitor, RAF inhibitor, VEGFR inhibitor, RET tyrosine kinase inhibitor        |
| lenalidomide       | trt_cp | BRD-K05926469 | CRBN, TNF, CDH5, PTGS2, TNFSF11                                                                                                                              | Antineoplastic                                                                                                                |
| tandutinib         | trt_cp | BRD-K89162000 | FLT3, KIT, PDGFRA, PDGFRB, CSF1R, PDGFD                                                                                                                      | FLT3 inhibitor, KIT inhibitor, PDGFR receptor inhibitor                                                                       |
| balsalazide        | trt_cp | BRD-K41410256 | PTGS1, PTGS2, ALOX5, PPARG                                                                                                                                   | Cyclooxygenase inhibitor                                                                                                      |
| honokiol           | trt_cp | BRD-K98493452 | ALOX5, PTGS1, PTGS2                                                                                                                                          | AKT inhibitor                                                                                                                 |
| sulfasalazine      | trt_cp | BRD-K10670311 | PTGS1, PTGS2, ACAT1, ALOX5, CHUK, IKBKB, PLA2G1B, PPARG, SLC46A1, SLC7A11, TBXAS1                                                                            | Antirheumatic, NFkB pathway inhibitor                                                                                         |
| QL-X-138           | trt_cp | BRD-U33728988 | BTK, JAK3, MKNK2, MTOR, PRKDC                                                                                                                                | MTOR inhibitor                                                                                                                |
| QL-XII-47          | trt_cp | BRD-U86922168 | BMX, BTK                                                                                                                                                     | BTK inhibitor, Cytoplasmic tyrosine protein kinase BMX inhibitor                                                              |
| GSK-3-inhibitor-IX | trt_cp | BRD-K04923131 | ALOX5, GSK3A, GSK3B                                                                                                                                          | Glycogen synthase kinase inhibitor, Lipxygenase inhibitor                                                                     |
| tyrphostin-AG-1295 | trt_cp | BRD-K57926513 | FLT3, KDR, PDGFRA, PDGFRB                                                                                                                                    | PDGFR receptor inhibitor                                                                                                      |
| SB-203580          | trt_cp | BRD-K99291625 | MAPK14, MAPK1, MAPK11, AKT1, ALOX5, CHEK1, CYP2D6, CYP3A4, GAK, GSK3B, LCK, MAPK10, MAPK12, MAPK8, MAPK9, PRKCA, RAF1, RIPK2, ROCK1, RPS6KB1, SGK1, SRC, TNF | p38 MAPK inhibitor                                                                                                            |
| terreic-acid       | trt_cp | BRD-A64228451 | BTK                                                                                                                                                          | BTK inhibitor                                                                                                                 |

|              |        |               |                                                                                                                 |                                                                                                                                            |
|--------------|--------|---------------|-----------------------------------------------------------------------------------------------------------------|--------------------------------------------------------------------------------------------------------------------------------------------|
| hyperforin   | trt_cp | BRD-A80775386 | NR1I2, ALOX5, PTGS1, TRPC6                                                                                      | Cyclooxygenase inhibitor, Dopamine uptake inhibitor, Interleukin receptor antagonist, Lipoxygenase inhibitor, Serotonin reuptake inhibitor |
| enzastaurin  | trt_cp | BRD-K79404599 | PRKCB, AKT1, GSK3B, PRKCA, PRKCD, PRKCG                                                                         | PKC inhibitor                                                                                                                              |
| KIN001-127   | trt_cp | BRD-A29901043 | ITK                                                                                                             | ITK inhibitor                                                                                                                              |
| quizartinib  | trt_cp | BRD-K93918653 | FLT3, CSF1R, KIT, RET, PDGFRA, PDGFRB                                                                           | FLT3 inhibitor                                                                                                                             |
| lestaurtinib | trt_cp | BRD-K23192422 | FLT3, NTRK1, JAK2, NTRK2, NTRK3                                                                                 | FLT3 inhibitor, Growth factor receptor inhibitor, JAK inhibitor                                                                            |
| linifanib    | trt_cp | BRD-K99749624 | CSF1R, KDR, PDGFRB, FLT1, FLT3, FLT4, CSF1, KIT, PDGFRA, RET, TEK                                               | PDGFR receptor inhibitor, VEGFR inhibitor                                                                                                  |
| cediranib    | trt_cp | BRD-K86930074 | KDR, FLT1, FLT4, KIT, PDGFRB, CSF1R, FLT3, PDGFRA                                                               | KIT inhibitor, VEGFR inhibitor                                                                                                             |
| dovitinib    | trt_cp | BRD-K85402309 | EGFR, FGFR3, PDGFRB, CSF1R, FGFR1, FGFR2, FLT1, FLT3, FLT4, INSR, KDR, KIT, PDGFRA                              | EGFR inhibitor, FLT3 inhibitor, FGFR inhibitor, PDGFR receptor inhibitor, VEGFR inhibitor                                                  |
| pazopanib    | trt_cp | BRD-K74514084 | KDR, KIT, FLT1, FLT4, PDGFRB, PDGFRA, BRAF, CSF1R, CYP2B6, CYP2C8, CYP2E1, DDR2, FGF1, FGFR1, FGFR3, ITK, SH2B3 | KIT inhibitor, PDGFR receptor inhibitor, VEGFR inhibitor                                                                                   |
| sunitinib    | trt_cp | BRD-M64432851 | FLT3, KDR, KIT, FLT4, FLT1, PDGFRA, PDGFRB, RET, CSF1R, FGFR1                                                   | FLT3 inhibitor, KIT inhibitor, PDGFR receptor inhibitor, RET tyrosine kinase inhibitor, VEGFR inhibitor                                    |
| sunitinib    | trt_cp | BRD-K70511574 | FLT3, KDR, KIT, FLT4, FLT1, PDGFRA, PDGFRB, RET, CSF1R, FGFR1                                                   | PLK inhibitor                                                                                                                              |
| montelukast  | trt_cp | BRD-A31312900 | CYSLTR1, ALOX5, CYP2C8                                                                                          | Leukotriene receptor antagonist                                                                                                            |

|               |            |                    |                                                                                                                                                                                                                                                                        |                                               |
|---------------|------------|--------------------|------------------------------------------------------------------------------------------------------------------------------------------------------------------------------------------------------------------------------------------------------------------------|-----------------------------------------------|
| staurosporine | trt_cp     | BRD-K17953061      | CDK2, GSK3B,<br>CAMK2B, CDK1, CDK5,<br>CHEK1, CHRM1,<br>CHRM2, CHRM4, CSK,<br>DAPK1, GPR35, IKBKB,<br>ITK, LCK, LRRK2,<br>MAP2K4, MAP2K6,<br>MAPKAPK2, PAK2,<br>PDPK1, PHKG2,<br>PIK3CG, PIM1, PKN1,<br>PRKACB, PRKCI,<br>PRKCQ, RPS6KA1,<br>STK3, SYK, TNIK,<br>ZAP70 | PKC inhibitor                                 |
| prostratin    | trt_cp     | BRD-K91145395      | PRKCA, PRKCB,<br>PRKCD, PRKCE,<br>PRKCG, PRKCH,<br>PRKCQ                                                                                                                                                                                                               | PKC activator                                 |
| ataluren      | trt_cp     | BRD-K94830329      | CFTR, DMD, F8, F9                                                                                                                                                                                                                                                      | CFTR channel agonist,<br>Dystrophin stimulant |
| ADCY3         | trt_oe     | ccsbBroad304_00024 |                                                                                                                                                                                                                                                                        |                                               |
| CD40          | trt_oe     | ccsbBroad304_00259 |                                                                                                                                                                                                                                                                        |                                               |
| F11           | trt_oe     | ccsbBroad304_00532 |                                                                                                                                                                                                                                                                        |                                               |
| GNAI2         | trt_oe     | ccsbBroad304_06292 |                                                                                                                                                                                                                                                                        |                                               |
| GNGT2         | trt_oe     | ccsbBroad304_00661 |                                                                                                                                                                                                                                                                        |                                               |
| HLA-DMB       | trt_oe     | ccsbBroad304_06370 |                                                                                                                                                                                                                                                                        |                                               |
| IL7R          | trt_oe     | ccsbBroad304_00853 |                                                                                                                                                                                                                                                                        |                                               |
| ITGB2         | trt_oe     | ccsbBroad304_06464 |                                                                                                                                                                                                                                                                        |                                               |
| NCF2          | trt_oe     | ccsbBroad304_06619 |                                                                                                                                                                                                                                                                        |                                               |
| PLCG2         | trt_oe     | ccsbBroad304_06736 |                                                                                                                                                                                                                                                                        |                                               |
| PPP3CC        | trt_oe     | ccsbBroad304_06761 |                                                                                                                                                                                                                                                                        |                                               |
| PRKCB         | trt_oe     | ccsbBroad304_01282 |                                                                                                                                                                                                                                                                        |                                               |
| PRKCE         | trt_oe     | ccsbBroad304_01283 |                                                                                                                                                                                                                                                                        |                                               |
| PTPN6         | trt_oe     | ccsbBroad304_01342 |                                                                                                                                                                                                                                                                        |                                               |
| STAT5A        | trt_oe     | ccsbBroad304_07008 |                                                                                                                                                                                                                                                                        |                                               |
| TLR8          | trt_oe     | ccsbBroad304_08275 |                                                                                                                                                                                                                                                                        |                                               |
| TNFSF13       | trt_oe     | ccsbBroad304_07292 |                                                                                                                                                                                                                                                                        |                                               |
| BTK           | trt_oe     | ccsbBroad304_00180 |                                                                                                                                                                                                                                                                        |                                               |
| FGR           | trt_oe     | ccsbBroad304_00564 |                                                                                                                                                                                                                                                                        |                                               |
| EGR3          | trt_oe     | ccsbBroad304_00488 |                                                                                                                                                                                                                                                                        |                                               |
| ADCY3         | trt_sh.cgs | CGS001-109         |                                                                                                                                                                                                                                                                        |                                               |
| CFD           | trt_sh.cgs | CGS001-1675        |                                                                                                                                                                                                                                                                        |                                               |
| EGR3          | trt_sh.cgs | CGS001-1960        |                                                                                                                                                                                                                                                                        |                                               |
| F11           | trt_sh.cgs | CGS001-2160        |                                                                                                                                                                                                                                                                        |                                               |
| FLT3          | trt_sh.cgs | CGS001-2322        |                                                                                                                                                                                                                                                                        |                                               |
| GNAI2         | trt_sh.cgs | CGS001-2771        |                                                                                                                                                                                                                                                                        |                                               |
| GNGT2         | trt_sh.cgs | CGS001-2793        |                                                                                                                                                                                                                                                                        |                                               |

|           |            |               |                                                                                   |                                                                                                                                              |
|-----------|------------|---------------|-----------------------------------------------------------------------------------|----------------------------------------------------------------------------------------------------------------------------------------------|
| GRK5      | trt_sh.cgs | CGS001-2869   |                                                                                   |                                                                                                                                              |
| HLA-DMB   | trt_sh.cgs | CGS001-3109   |                                                                                   |                                                                                                                                              |
| IL7R      | trt_sh.cgs | CGS001-3575   |                                                                                   |                                                                                                                                              |
| IL11      | trt_sh.cgs | CGS001-3589   |                                                                                   |                                                                                                                                              |
| ITGB2     | trt_sh.cgs | CGS001-3689   |                                                                                   |                                                                                                                                              |
| MYD88     | trt_sh.cgs | CGS001-4615   |                                                                                   |                                                                                                                                              |
| NCF2      | trt_sh.cgs | CGS001-4688   |                                                                                   |                                                                                                                                              |
| TLR8      | trt_sh.cgs | CGS001-51311  |                                                                                   |                                                                                                                                              |
| PLCG2     | trt_sh.cgs | CGS001-5336   |                                                                                   |                                                                                                                                              |
| PPP3CC    | trt_sh.cgs | CGS001-5533   |                                                                                   |                                                                                                                                              |
| PRKCB     | trt_sh.cgs | CGS001-5579   |                                                                                   |                                                                                                                                              |
| PRKCE     | trt_sh.cgs | CGS001-5581   |                                                                                   |                                                                                                                                              |
| PTPN6     | trt_sh.cgs | CGS001-5777   |                                                                                   |                                                                                                                                              |
| STAT5A    | trt_sh.cgs | CGS001-6776   |                                                                                   |                                                                                                                                              |
| BTK       | trt_sh.cgs | CGS001-695    |                                                                                   |                                                                                                                                              |
| THBD      | trt_sh.cgs | CGS001-7056   |                                                                                   |                                                                                                                                              |
| TLR4      | trt_sh.cgs | CGS001-7099   |                                                                                   |                                                                                                                                              |
| TNFSF13   | trt_sh.cgs | CGS001-8741   |                                                                                   |                                                                                                                                              |
| CD40      | trt_sh.cgs | CGS001-958    |                                                                                   |                                                                                                                                              |
| AT-9283   | trt_cp     | BRD-K24576554 | AURKA, AURKB, ABL1, BCR, FLT3, JAK2, JAK3, RPS6KA6, STK17A                        | JAK inhibitor, Aurora kinase inhibitor, ABL inhibitor, BCR-ABL kinase inhibitor, FLT3 inhibitor, Mitotic inhibitor, Protein kinase inhibitor |
| ENMD-2076 | trt_cp     | BRD-K68488863 | AURKA, FLT3, KDR, PDGFRA, SRC, CSF1R, EPHA1, FGFR1, FGFR2, FGFR3, FLT4, KIT, PTK2 | FLT3 inhibitor, VEGFR inhibitor, Aurora kinase inhibitor                                                                                     |

---

Supplementary Table S9. Connectivity map analysis for GSE120622 LUSC.

| Name               | Type   | Perturbagen Id | Target                                                                                   | MOA                                                              |
|--------------------|--------|----------------|------------------------------------------------------------------------------------------|------------------------------------------------------------------|
| BW-B70C            | trt_cp | BRD-A55946879  | ALOX5                                                                                    | Lipoxygenase inhibitor                                           |
| colforsin          | trt_cp | BRD-A55416093  | ADCY2, ADCY5, GNAS                                                                       | Adenylyl cyclase activator, Adenylate cyclase stimulant          |
| diclofenac         | trt_cp | BRD-K08252256  | PTGS1, PTGS2, AKR1C3, ALOX5, ASIC1, ASIC3, CYP2C8, KCNQ2, KCNQ3, PLA2G2A, PPARG, SCN4A   | Cyclooxygenase inhibitor                                         |
| diethylcarbamazine | trt_cp | BRD-K45542189  | ALOX5, PTGS1                                                                             | Lipoxygenase inhibitor                                           |
| ezetimibe          | trt_cp | BRD-A41519720  | NPC1L1, ANPEP, SOAT1                                                                     | Niemann-Pick C1-like 1 protein antagonist, Cholesterol inhibitor |
| flutamide          | trt_cp | BRD-K28307902  | AR, AHR, CYP2C19                                                                         | Androgen receptor antagonist                                     |
| menadione          | trt_cp | BRD-K78126613  | AOX1, BGLAP, F10, F2, F7, F9, GGCX, NQO1, NQO2, PKM, PROC, PROS1, PROZ, VKORC1, VKORC1L1 | Mitochondrial DNA polymerase inhibitor, Phosphatase inhibitor    |
| mexiletine         | trt_cp | BRD-A64092382  | SCN5A, AHR, CYP2B6, CYP2E1, KCNK2, KCNK3, SCN4A                                          | Sodium channel blocker                                           |
| nimodipine         | trt_cp | BRD-A58048407  | CACNA1C, NR3C2, AHR, CACNA1D, CACNA1F, CACNA1S, CACNB1, CACNB2, CACNB3, CACNB4, CFTR     | Calcium channel blocker                                          |

|                               |        |               |                                                                                                                                                                       |                                                                                                                                                                                                           |
|-------------------------------|--------|---------------|-----------------------------------------------------------------------------------------------------------------------------------------------------------------------|-----------------------------------------------------------------------------------------------------------------------------------------------------------------------------------------------------------|
| mepacrine                     | trt_cp | BRD-A45889380 | TP53, AKT1, MTOR, NFKB1, PLA2G1B, PLA2G2A, PLA2G2D, PLA2G4A, PLA2G6, PLCL1                                                                                            | Cytokine production inhibitor, NFkB pathway inhibitor, TP53 activator                                                                                                                                     |
| rhamnetin                     | trt_cp | BRD-K37206356 | ALOX5, MAPK8                                                                                                                                                          | HDAC inhibitor                                                                                                                                                                                            |
| thalidomide                   | trt_cp | BRD-A93255169 | TNF, CRBN, CYP1A2, CYP2B6, CYP2C19, CYP3A5, FGFR2, NFKB1, ORM1, ORM2, PTGS2                                                                                           | TNF production inhibitor                                                                                                                                                                                  |
| ZM-39923                      | trt_cp | BRD-K40624912 | JAK1, JAK3                                                                                                                                                            | JAK inhibitor                                                                                                                                                                                             |
| AG-490                        | trt_cp | BRD-K12357156 | JAK2, JAK3, EGFR, STAT3                                                                                                                                               | EGFR inhibitor, ErbB2 inhibitor, JAK inhibitor                                                                                                                                                            |
| arctigenin                    | trt_cp | BRD-K53523901 | ADIPOR1, AHR, CHUK, MAP2K1                                                                                                                                            | MEK inhibitor                                                                                                                                                                                             |
| ubenimex                      | trt_cp | BRD-K59574735 | LTA4H, ANPEP, RNPEP                                                                                                                                                   | Leukotriene inhibitor                                                                                                                                                                                     |
| CDC                           | trt_cp | BRD-K10870738 | ALOX12, ALOX5                                                                                                                                                         | Lipoxygenase inhibitor                                                                                                                                                                                    |
| caffeic-acid                  | trt_cp | BRD-K84709232 | ALOX5, MIF, RELA, TNF                                                                                                                                                 | Lipoxygenase inhibitor, HIV integrase inhibitor, NFkB pathway inhibitor, Nitric oxide production inhibitor, PPAR receptor modulator, TNF production inhibitor, Tumor necrosis factor production inhibitor |
| Cyclo-[Arg-Gly-Asp-D-Phe-Val] | trt_cp | BRD-K95992530 | ITGAV, ITGB3                                                                                                                                                          | integrin antagonist                                                                                                                                                                                       |
| dextromethorphan              | trt_cp | BRD-K33211335 | SIGMAR1, CHRNA2, CHRNA3, CHRNA4, CHRNA7, CHRNB2, CHRNB4, CYBA, CYBB, CYP3A5, GRIN1, GRIN3A, NCF1, NCF2, NCF4, OPRD1, OPRK1, OPRM1, PGRMC1, RAC1, RAC2, SLC6A2, SLC6A4 | Glutamate receptor antagonist, Sigma receptor agonist                                                                                                                                                     |
| GR-144053                     | trt_cp | BRD-K12120659 | ITGB3, ITGA2B                                                                                                                                                         | Integrin antagonist                                                                                                                                                                                       |
| GTP-14564                     | trt_cp | BRD-K16664969 | FLT3, CSF1R, KIT, PDGFRB                                                                                                                                              | FLT3 inhibitor, Tyrosine kinase inhibitor                                                                                                                                                                 |
| indole                        | trt_cp | BRD-K01815685 | AHR, IDO1                                                                                                                                                             | aryl hydrocarbon receptor agonist                                                                                                                                                                         |
| ITE                           | trt_cp | BRD-K60298136 | AHR                                                                                                                                                                   | Aryl hydrocarbon receptor agonist                                                                                                                                                                         |
| JAK3-inhibitor-I              | trt_cp | BRD-K72541103 | JAK3                                                                                                                                                                  | JAK inhibitor                                                                                                                                                                                             |
| JAK3-Inhibitor-II             | trt_cp | BRD-K52850071 | EGFR, ALK, JAK1, JAK2, JAK3                                                                                                                                           | JAK inhibitor                                                                                                                                                                                             |
| JAK3-inhibitor-V              | trt_cp | BRD-K95676198 | JAK3                                                                                                                                                                  | JAK inhibitor                                                                                                                                                                                             |
| JAK3-inhibitor-VI             | trt_cp | BRD-K04546108 | JAK3                                                                                                                                                                  | JAK inhibitor                                                                                                                                                                                             |
| LFM-A13                       | trt_cp | BRD-A30655177 | BTK                                                                                                                                                                   | BTK inhibitor                                                                                                                                                                                             |
| lovastatin                    | trt_cp | BRD-K09416995 | HMGCR, CYP3A5, HDAC2, ITGAL, NR1I2                                                                                                                                    | HMGCR inhibitor                                                                                                                                                                                           |

|                                 |        |               |                                                                                                   |                                                                                  |
|---------------------------------|--------|---------------|---------------------------------------------------------------------------------------------------|----------------------------------------------------------------------------------|
| leflunomide                     | trt_cp | BRD-K78692225 | DHODH, AHR, CYP2C19, JAK3, PTK2B, STAT6                                                           | Dihydroorotate dehydrogenase inhibitor, PDGFR receptor inhibitor                 |
| meclofenamic-acid               | trt_cp | BRD-K50398167 | PTGS1, PTGS2, ALOX5, CNR1, KCNQ2, KCNQ3                                                           | Cyclooxygenase inhibitor, Prostanoid receptor antagonist                         |
| PD-169316                       | trt_cp | BRD-K77133231 | ALOX5                                                                                             | p38 MAPK inhibitor                                                               |
| REV-5901                        | trt_cp | BRD-A68281735 | ALOX5                                                                                             | Leukotriene receptor antagonist, Lipoxigenase inhibitor                          |
| SB-202190                       | trt_cp | BRD-K54330070 | MAPK14, AKT1, ALOX5, CHEK1, GSK3B, LCK, MAPK1, MAPK11, MAPK12, MAPK8, PRKCA, ROCK1, RPS6KB1, SGK1 | p38 MAPK inhibitor                                                               |
| SKF-86002                       | trt_cp | BRD-K96809896 | ALOX5, MAPK14                                                                                     | p38 MAPK inhibitor                                                               |
| SQ-22536                        | trt_cp | BRD-A56987319 | ADCY1, ADCY5                                                                                      | Adenylyl cyclase inhibitor                                                       |
| tenidap                         | trt_cp | BRD-A87479750 | ALOX5, KCNJ4, PTGS1                                                                               | Cyclooxygenase inhibitor                                                         |
| zileuton                        | trt_cp | BRD-A56359832 | ALOX5                                                                                             | Leukotriene inhibitor, Lipoxigenase inhibitor                                    |
| maraviroc                       | trt_cp | BRD-A04352665 | CCR5, CYP3A5                                                                                      | CC chemokine receptor antagonist                                                 |
| TG-101348                       | trt_cp | BRD-K12502280 | JAK2, FLT3, BRD4, JAK1, JAK3, RET, TYK2                                                           | FLT3 inhibitor, JAK inhibitor                                                    |
| atorvastatin                    | trt_cp | BRD-U88459701 | HMGCR, DPP4, AHR, CYP3A5, FASLG                                                                   | HMGCR inhibitor                                                                  |
| forskolin                       | trt_cp | BRD-A70449690 | ADCY2, ADCY5, GNAS                                                                                | Adenylyl cyclase activator                                                       |
| phorbol-12-myristate-13-acetate | trt_cp | BRD-A15079084 | CD4, KCNT2, PRKCA, TRPV4                                                                          | PKC activator                                                                    |
| givinostat                      | trt_cp | BRD-K13810148 | HDAC2, HDAC1, HDAC3, HDAC4, HDAC5, HDAC6, HDAC7, HDAC8, HDAC9, IL1B, IL1R2, IL6R, TNF             | HDAC inhibitor                                                                   |
| HG-6-64-01                      | trt_cp | BRD-U37049823 | ABL1, BRAF, CSF1R, EGFR, FGFR1, FLT3, KIT, MAPK11, PDGFRB, RET                                    | RAF inhibitor                                                                    |
| HU-211                          | trt_cp | BRD-A15010982 | CNR1, CNR2, GLRA1, GLRA2, GLRA3, GPR55, GRIN1, NFKB1                                              | Glutamate receptor antagonist                                                    |
| CAY-10470                       | trt_cp | BRD-K07403598 | NFKB1, TNF                                                                                        | NFkB pathway inhibitor                                                           |
| mesalazine                      | trt_cp | BRD-K28849549 | PTGS1, PPARG, PTGS2, ALOX5, CHUK, CTNNB1, IKKBK, MPO, NAT1                                        | Cyclooxygenase inhibitor, Lipoxigenase inhibitor, Prostanoid receptor antagonist |
| sirolimus                       | trt_cp | BRD-K89626439 | MTOR, FKBP1A, CCR5, FGF2                                                                          | MTOR inhibitor                                                                   |

|                       |        |               |                                                                                                                                                              |                                                                                                                               |
|-----------------------|--------|---------------|--------------------------------------------------------------------------------------------------------------------------------------------------------------|-------------------------------------------------------------------------------------------------------------------------------|
| dasatinib             | trt_cp | BRD-K49328571 | ABL1, FYN, LCK, SRC, KIT, YES1, BCR, EPHA2, LYN, PDGFRB, ABL2, BTK, DDR1, DDR2, PDGFRA, STAT5B                                                               | BCR-ABL kinase inhibitor, Ephrin inhibitor, KIT inhibitor, PDGFR receptor inhibitor, SRC inhibitor, Tyrosine kinase inhibitor |
| imatinib              | trt_cp | BRD-K92723993 | ABL1, KIT, PDGFRA, BCR, CSF1R, PDGFRB, ABCG2, CYP2C19, CYP2C8, CYP3A5, DDR1, NTRK1, RET                                                                      | BCR-ABL kinase inhibitor, KIT inhibitor, PDGFR receptor inhibitor                                                             |
| lenalidomide          | trt_cp | BRD-K05926469 | CRBN, TNF, CDH5, PTGS2, TNFSF11                                                                                                                              | Antineoplastic                                                                                                                |
| tandutinib            | trt_cp | BRD-K89162000 | FLT3, KIT, PDGFRA, PDGFRB, CSF1R, PDGFD                                                                                                                      | FLT3 inhibitor, KIT inhibitor, PDGFR receptor inhibitor                                                                       |
| sitagliptin           | trt_cp | BRD-K19416115 | DPP4, CYP2C8, FASLG, HMGCR, SLC22A8                                                                                                                          | Dipeptidyl peptidase inhibitor                                                                                                |
| tofacitinib           | trt_cp | BRD-K31283835 | JAK3, JAK1, JAK2, CYP2C19, TYK2                                                                                                                              | JAK inhibitor                                                                                                                 |
| balsalazide           | trt_cp | BRD-K41410256 | PTGS1, PTGS2, ALOX5, PPARG                                                                                                                                   | Cyclooxygenase inhibitor                                                                                                      |
| honokiol              | trt_cp | BRD-K98493452 | ALOX5, PTGS1, PTGS2                                                                                                                                          | AKT inhibitor                                                                                                                 |
| sulfasalazine         | trt_cp | BRD-K10670311 | PTGS1, PTGS2, ACAT1, ALOX5, CHUK, IKBKB, PLA2G1B, PPARG, SLC46A1, SLC7A11, TBXAS1                                                                            | Antirheumatic, NFkB pathway inhibitor                                                                                         |
| WZ-4-145              | trt_cp | BRD-U25771771 | CSF1R, DDR1, EGFR, PDGFRA, TIE1                                                                                                                              | EGFR inhibitor                                                                                                                |
| QL-X-138              | trt_cp | BRD-U33728988 | BTK, JAK3, MKNK2, MTOR, PRKDC                                                                                                                                | MTOR inhibitor                                                                                                                |
| QL-XII-47             | trt_cp | BRD-U86922168 | BMX, BTK                                                                                                                                                     | BTK inhibitor, Cytoplasmic tyrosine protein kinase BMX inhibitor                                                              |
| GSK-3-inhibitor-IX    | trt_cp | BRD-K04923131 | ALOX5, GSK3A, GSK3B                                                                                                                                          | Glycogen synthase kinase inhibitor, Lipoygenase inhibitor                                                                     |
| ruxolitinib           | trt_cp | BRD-K53972329 | JAK1, JAK2, TYK2, JAK3                                                                                                                                       | JAK inhibitor                                                                                                                 |
| SB-203580             | trt_cp | BRD-K99291625 | MAPK14, MAPK1, MAPK11, AKT1, ALOX5, CHEK1, CYP2D6, CYP3A4, GAK, GSK3B, LCK, MAPK10, MAPK12, MAPK8, MAPK9, PRKCA, RAF1, RIPK2, ROCK1, RPS6KB1, SGK1, SRC, TNF | p38 MAPK inhibitor                                                                                                            |
| terreic-acid          | trt_cp | BRD-A64228451 | BTK                                                                                                                                                          | BTK inhibitor                                                                                                                 |
| 3,3'-diindolylmethane | trt_cp | BRD-K37846922 | AHR, AR, CYP1A2, GUSB, IDO1                                                                                                                                  | CHK inhibitor, Cytochrome P450 activator, Indoleamine 2,3-dioxygenase inhibitor                                               |



|             |        |               |                                                                                                                                               |                                                                                                                                            |
|-------------|--------|---------------|-----------------------------------------------------------------------------------------------------------------------------------------------|--------------------------------------------------------------------------------------------------------------------------------------------|
| hyperforin  | trt_cp | BRD-A80775386 | NR1I2, ALOX5, PTGS1, TRPC6                                                                                                                    | Cyclooxygenase inhibitor, Dopamine uptake inhibitor, Interleukin receptor antagonist, Lipoxygenase inhibitor, Serotonin reuptake inhibitor |
| KIN001-127  | trt_cp | BRD-A29901043 | ITK                                                                                                                                           | ITK inhibitor                                                                                                                              |
| KIN001-055  | trt_cp | BRD-K68407802 | EGFR, JAK3                                                                                                                                    | EGFR inhibitor, JAK inhibitor, Leukotriene inhibitor, Mediator release inhibitor                                                           |
| quizartinib | trt_cp | BRD-K93918653 | FLT3, CSF1R, KIT, RET, PDGFRA, PDGFRB                                                                                                         | FLT3 inhibitor                                                                                                                             |
| linifanib   | trt_cp | BRD-K99749624 | CSF1R, KDR, PDGFRB, FLT1, FLT3, FLT4, CSF1, KIT, PDGFRA, RET, TEK                                                                             | PDGFR receptor inhibitor, VEGFR inhibitor                                                                                                  |
| cediranib   | trt_cp | BRD-K86930074 | KDR, FLT1, FLT4, KIT, PDGFRB, CSF1R, FLT3, PDGFRA                                                                                             | KIT inhibitor, VEGFR inhibitor                                                                                                             |
| dovitinib   | trt_cp | BRD-K85402309 | EGFR, FGFR3, PDGFRB, CSF1R, FGFR1, FGFR2, FLT1, FLT3, FLT4, INSR, KDR, KIT, PDGFRA                                                            | EGFR inhibitor, FLT3 inhibitor, FGFR inhibitor, PDGFR receptor inhibitor, VEGFR inhibitor                                                  |
| pazopanib   | trt_cp | BRD-K74514084 | KDR, KIT, FLT1, FLT4, PDGFRB, PDGFRA, BRAF, CSF1R, CYP2B6, CYP2C8, CYP2E1, DDR2, FGF1, FGFR1, FGFR3, ITK, SH2B3                               | KIT inhibitor, PDGFR receptor inhibitor, VEGFR inhibitor                                                                                   |
| sunitinib   | trt_cp | BRD-M64432851 | FLT3, KDR, KIT, FLT4, FLT1, PDGFRA, PDGFRB, RET, CSF1R, FGFR1                                                                                 | FLT3 inhibitor, KIT inhibitor, PDGFR receptor inhibitor, RET tyrosine kinase inhibitor, VEGFR inhibitor                                    |
| cinacalcet  | trt_cp | BRD-K73838513 | CASR                                                                                                                                          | Calcium channel activator                                                                                                                  |
| sunitinib   | trt_cp | BRD-K70511574 | FLT3, KDR, KIT, FLT4, FLT1, PDGFRA, PDGFRB, RET, CSF1R, FGFR1                                                                                 | PLK inhibitor                                                                                                                              |
| vicriviroc  | trt_cp | BRD-M72442222 | CCR5                                                                                                                                          | CC chemokine receptor antagonist                                                                                                           |
| montelukast | trt_cp | BRD-A31312900 | CYSLTR1, ALOX5, CYP2C8                                                                                                                        | Leukotriene receptor antagonist                                                                                                            |
| aspirin     | trt_cp | BRD-K11433652 | PTGS1, PTGS2, TP53, AKR1C1, ASIC3, EDNRA, HSPA5, IKBKB, NFKB1, NFKB2, NFKBIA, PRKAA1, PRKAA2, PRKAB1, PRKAB2, PRKAG1, PRKAG2, PRKAG3, RPS6KA3 | Cyclooxygenase inhibitor                                                                                                                   |

|               |            |                    |                                                                                                                                                                                                                                 |               |
|---------------|------------|--------------------|---------------------------------------------------------------------------------------------------------------------------------------------------------------------------------------------------------------------------------|---------------|
| staurosporine | trt_cp     | BRD-K17953061      | CDK2, GSK3B, CAMK2B, CDK1, CDK5, CHEK1, CHRM1, CHRM2, CHRM4, CSK, DAPK1, GPR35, IKBKB, ITK, LCK, LRRK2, MAP2K4, MAP2K6, MAPKAPK2, PAK2, PDPK1, PHKG2, PIK3CG, PIM1, PKN1, PRKACB, PRKCI, PRKCQ, RPS6KA1, STK3, SYK, TNIK, ZAP70 | PKC inhibitor |
| vidarabine    | trt_cp     | BRD-K72093121      | ADCY5                                                                                                                                                                                                                           | Antiviral     |
| CD19          | trt_oe     | ccsbBroad304_00250 |                                                                                                                                                                                                                                 |               |
| CD40          | trt_oe     | ccsbBroad304_00259 |                                                                                                                                                                                                                                 |               |
| CXCL1         | trt_oe     | ccsbBroad304_00695 |                                                                                                                                                                                                                                 |               |
| F11           | trt_oe     | ccsbBroad304_00532 |                                                                                                                                                                                                                                 |               |
| FAS           | trt_oe     | ccsbBroad304_00087 |                                                                                                                                                                                                                                 |               |
| GNGT2         | trt_oe     | ccsbBroad304_00661 |                                                                                                                                                                                                                                 |               |
| IFIH1         | trt_oe     | ccsbBroad304_08839 |                                                                                                                                                                                                                                 |               |
| IL15          | trt_oe     | ccsbBroad304_00863 |                                                                                                                                                                                                                                 |               |
| IL1R2         | trt_oe     | ccsbBroad304_01833 |                                                                                                                                                                                                                                 |               |
| IL21R         | trt_oe     | ccsbBroad304_03148 |                                                                                                                                                                                                                                 |               |
| IL2RB         | trt_oe     | ccsbBroad304_06438 |                                                                                                                                                                                                                                 |               |
| PSME1         | trt_oe     | ccsbBroad304_01326 |                                                                                                                                                                                                                                 |               |
| STAT5A        | trt_oe     | ccsbBroad304_07008 |                                                                                                                                                                                                                                 |               |
| BTk           | trt_oe     | ccsbBroad304_00180 |                                                                                                                                                                                                                                 |               |
| ANPEP         | trt_oe     | ccsbBroad304_05817 |                                                                                                                                                                                                                                 |               |
| BCL10         | trt_oe     | ccsbBroad304_02048 |                                                                                                                                                                                                                                 |               |
| CTLA4         | trt_oe     | ccsbBroad304_00392 |                                                                                                                                                                                                                                 |               |
| FASLG         | trt_oe     | ccsbBroad304_00088 |                                                                                                                                                                                                                                 |               |
| GNG8          | trt_oe     | ccsbBroad304_04619 |                                                                                                                                                                                                                                 |               |
| MAPKAPK2      | trt_oe     | ccsbBroad304_07381 |                                                                                                                                                                                                                                 |               |
| NFKB1         | trt_oe     | ccsbBroad304_06637 |                                                                                                                                                                                                                                 |               |
| RELB          | trt_oe     | ccsbBroad304_01388 |                                                                                                                                                                                                                                 |               |
| ADCY5         | trt_sh.cgs | CGS001-111         |                                                                                                                                                                                                                                 |               |
| CTLA4         | trt_sh.cgs | CGS001-1493        |                                                                                                                                                                                                                                 |               |
| AHR           | trt_sh.cgs | CGS001-196         |                                                                                                                                                                                                                                 |               |
| F5            | trt_sh.cgs | CGS001-2153        |                                                                                                                                                                                                                                 |               |
| F7            | trt_sh.cgs | CGS001-2155        |                                                                                                                                                                                                                                 |               |
| F11           | trt_sh.cgs | CGS001-2160        |                                                                                                                                                                                                                                 |               |
| GPRC6A        | trt_sh.cgs | CGS001-222545      |                                                                                                                                                                                                                                 |               |
| GNGT2         | trt_sh.cgs | CGS001-2793        |                                                                                                                                                                                                                                 |               |
| ANPEP         | trt_sh.cgs | CGS001-290         |                                                                                                                                                                                                                                 |               |
| CXCL1         | trt_sh.cgs | CGS001-2919        |                                                                                                                                                                                                                                 |               |
| HLA-DMA       | trt_sh.cgs | CGS001-3108        |                                                                                                                                                                                                                                 |               |
| FAS           | trt_sh.cgs | CGS001-355         |                                                                                                                                                                                                                                 |               |
| FASLG         | trt_sh.cgs | CGS001-356         |                                                                                                                                                                                                                                 |               |

|           |            |               |                                                                                   |                                                                                                                                              |
|-----------|------------|---------------|-----------------------------------------------------------------------------------|----------------------------------------------------------------------------------------------------------------------------------------------|
| IL2RB     | trt_sh.cgs | CGS001-3560   |                                                                                   |                                                                                                                                              |
| IL5       | trt_sh.cgs | CGS001-3567   |                                                                                   |                                                                                                                                              |
| IL15      | trt_sh.cgs | CGS001-3600   |                                                                                   |                                                                                                                                              |
| IRF1      | trt_sh.cgs | CGS001-3659   |                                                                                   |                                                                                                                                              |
| ITGB3     | trt_sh.cgs | CGS001-3690   |                                                                                   |                                                                                                                                              |
| JAK3      | trt_sh.cgs | CGS001-3718   |                                                                                   |                                                                                                                                              |
| NFATC2    | trt_sh.cgs | CGS001-4773   |                                                                                   |                                                                                                                                              |
| NFKB1     | trt_sh.cgs | CGS001-4790   |                                                                                   |                                                                                                                                              |
| NFKB2     | trt_sh.cgs | CGS001-4791   |                                                                                   |                                                                                                                                              |
| PSME1     | trt_sh.cgs | CGS001-5720   |                                                                                   |                                                                                                                                              |
| RELB      | trt_sh.cgs | CGS001-5971   |                                                                                   |                                                                                                                                              |
| IFIH1     | trt_sh.cgs | CGS001-64135  |                                                                                   |                                                                                                                                              |
| SOS1      | trt_sh.cgs | CGS001-6654   |                                                                                   |                                                                                                                                              |
| STAT5A    | trt_sh.cgs | CGS001-6776   |                                                                                   |                                                                                                                                              |
| BTK       | trt_sh.cgs | CGS001-695    |                                                                                   |                                                                                                                                              |
| IL1R2     | trt_sh.cgs | CGS001-7850   |                                                                                   |                                                                                                                                              |
| BCL10     | trt_sh.cgs | CGS001-8915   |                                                                                   |                                                                                                                                              |
| MAPKAPK2  | trt_sh.cgs | CGS001-9261   |                                                                                   |                                                                                                                                              |
| CD19      | trt_sh.cgs | CGS001-930    |                                                                                   |                                                                                                                                              |
| GNG8      | trt_sh.cgs | CGS001-94235  |                                                                                   |                                                                                                                                              |
| CD40      | trt_sh.cgs | CGS001-958    |                                                                                   |                                                                                                                                              |
| AT-9283   | trt_cp     | BRD-K24576554 | AURKA, AURKB, ABL1, BCR, FLT3, JAK2, JAK3, RPS6KA6, STK17A                        | JAK inhibitor, Aurora kinase inhibitor, ABL inhibitor, BCR-ABL kinase inhibitor, FLT3 inhibitor, Mitotic inhibitor, Protein kinase inhibitor |
| ENMD-2076 | trt_cp     | BRD-K68488863 | AURKA, FLT3, KDR, PDGFRA, SRC, CSF1R, EPHA1, FGFR1, FGFR2, FGFR3, FLT4, KIT, PTK2 | FLT3 inhibitor, VEGFR inhibitor, Aurora kinase inhibitor                                                                                     |

---

Supplementary Table S10. Connectivity map analysis of GSE111907 LUAD.

| Name         | Type   | Perturbagen Id | Target                                                                                                                                               | MOA                                                                                                                |
|--------------|--------|----------------|------------------------------------------------------------------------------------------------------------------------------------------------------|--------------------------------------------------------------------------------------------------------------------|
| colforsin    | trt_cp | BRD-A55416093  | ADCY2, ADCY5, GNAS                                                                                                                                   | Adenylyl cyclase activator, Adenylate cyclase stimulant                                                            |
| dorsomorphin | trt_cp | BRD-K54233340  | ACVR1, BMPR1A, BMPR1B, EPHA2, FKBP1A, FLT1, FLT3, KDR, LCK, MKNK1, PRKAA1, RPS6KA1, SRC                                                              | AMPK inhibitor                                                                                                     |
| ibuprofen    | trt_cp | BRD-A17655518  | PTGS2, PTGS1, ASIC1, BCL2, CFTR, CYP2C8, FABP2, PLAT, PPARG, SLC5A8, THBD                                                                            | Cyclooxygenase inhibitor, NFkB pathway inhibitor                                                                   |
| indoprofen   | trt_cp | BRD-A44090213  | PTGS1, PTGS2, CXCR1, CXCR2                                                                                                                           | Cyclooxygenase inhibitor, Prostanoid receptor antagonist                                                           |
| LY-294002    | trt_cp | BRD-K27305650  | MTOR, PIK3CD, PIK3CG, PIK3CA, PIK3CB, PLK1, PRKDC, AKT1, CHEK1, GSK3B, LCK, MAPK1, MAPK11, MAPK12, MAPK14, MAPK8, PDE2A, PRKCA, ROCK1, RPS6KB1, SGK1 | MTOR inhibitor, PI3K inhibitor, DNA dependent protein kinase inhibitor, Phosphodiesterase inhibitor, PLK inhibitor |
| menadione    | trt_cp | BRD-K78126613  | AOX1, BGLAP, F10, F2, F7, F9, GGCX, NQO1, NQO2, PKM, PROC, PROS1, PROZ, VKORC1, VKORC1L1                                                             | Mitochondrial DNA polymerase inhibitor, Phosphatase inhibitor                                                      |
| paclitaxel   | trt_cp | BRD-A28746609  | TUBB, NR1I2, ABCB1, BCL2, CYP2C8, MAP2, MAP4, MAPT, TLR4, TUBB1                                                                                      | Tubulin inhibitor                                                                                                  |
| mepacrine    | trt_cp | BRD-A45889380  | TP53, AKT1, MTOR, NFKB1, PLA2G1B, PLA2G2A,                                                                                                           | Cytokine production inhibitor, NFkB pathway inhibitor, TP53 activator                                              |

|                        |        |                   |                                                                                                                                        |                                                                                                |
|------------------------|--------|-------------------|----------------------------------------------------------------------------------------------------------------------------------------|------------------------------------------------------------------------------------------------|
|                        |        |                   | PLA2G2D, PLA2G4A,<br>PLA2G6, PLCL1                                                                                                     |                                                                                                |
| bisindolylmaleimide-ix | trt_cp | BRD-<br>K06543683 | SIRT1, AKT1, GSK3B, LCK,<br>LRRK2, MAPK1, MAPK11,<br>MAPK12, MAPK14, MAPK8,<br>PRKCA, ROCK1, RPS6KB1,<br>SIRT2                         | CDK inhibitor, PKC<br>inhibitor                                                                |
| TCS-359                | trt_cp | BRD-<br>K81376179 | FLT3                                                                                                                                   | FLT3 inhibitor                                                                                 |
| tricitibine            | trt_cp | BRD-<br>K80431395 | AKT1, AKT2, AKT3                                                                                                                       | AKT inhibitor                                                                                  |
| manumycin-a            | trt_cp | BRD-<br>K78599730 | FNTA, IKBKB                                                                                                                            | Farnesyltransferase<br>inhibitor, NFkB pathway<br>inhibitor                                    |
| rutin                  | trt_cp | BRD-<br>K20482099 | AKR1C3, AKR1B1, F10                                                                                                                    | Antioxidant, Capillary<br>stabilizing agent, Nitric<br>oxide scavenger                         |
| tyrphostin-AG-1296     | trt_cp | BRD-<br>K76064317 | FLT3                                                                                                                                   | FLT3 inhibitor                                                                                 |
| BH3I-1                 | trt_cp | BRD-<br>A38913120 | BCL2                                                                                                                                   | BCL inhibitor                                                                                  |
| BML-257                | trt_cp | BRD-<br>K32584078 | AKT1                                                                                                                                   | AKT inhibitor, HCV<br>inhibitor                                                                |
| BCL2-inhibitor         | trt_cp | BRD-<br>K39111395 | BCL2                                                                                                                                   | BCL inhibitor                                                                                  |
| deguelin               | trt_cp | BRD-<br>K61401890 | AKT1, PTGS2                                                                                                                            | NADH-ubiquinone<br>oxidoreductase (Complex<br>I) inhibitor                                     |
| GTP-14564              | trt_cp | BRD-<br>K16664969 | FLT3, CSF1R, KIT, PDGFRB                                                                                                               | FLT3 inhibitor, Tyrosine<br>kinase inhibitor                                                   |
| IKK-16                 | trt_cp | BRD-<br>K14618467 | IKBKB                                                                                                                                  | IKK inhibitor                                                                                  |
| IKK-2-inhibitor-V      | trt_cp | BRD-<br>K74305673 | IKBKB                                                                                                                                  | IKK inhibitor, NFkB<br>pathway inhibitor                                                       |
| KN-62                  | trt_cp | BRD-<br>A81177136 | AKT1, CAMK2A, CHEK1,<br>LCK, MAPK1, MAPK11,<br>MAPK12, MAPK14, MAPK8,<br>P2RX7, PRKCA, ROCK1,<br>RPS6KB1, SGK1                         | Calcium-calmodulin<br>dependent protein kinase<br>inhibitor, Purinergic<br>receptor antagonist |
| oxindole-I             | trt_cp | BRD-<br>K51816706 | AKT1, KDR, PDPK1, RET                                                                                                                  | VEGFR inhibitor                                                                                |
| PD-98059               | trt_cp | BRD-<br>K62810658 | MAP2K1, AKT1, CHEK1,<br>GSK3B, LCK, MAP2K2,<br>MAPK1, MAPK11, MAPK12,<br>MAPK14, MAPK3, MAPK8,<br>PRKCA, RAF1, ROCK1,<br>RPS6KB1, SGK1 | MEK inhibitor, MAP<br>kinase inhibitor                                                         |

|                                 |        |               |                                                                                                                                               |                                                      |
|---------------------------------|--------|---------------|-----------------------------------------------------------------------------------------------------------------------------------------------|------------------------------------------------------|
| D-64406                         | trt_cp | BRD-K27665173 | FLT3, PDGFRA, PDGFRB                                                                                                                          | PDGFR receptor inhibitor                             |
| midostaurin                     | trt_cp | BRD-K13646352 | FLT3, KIT, CCNB1, FLT1, KDR, PDGFRB, PRKCA, PRKCG, VEGFA                                                                                      | FLT3 inhibitor, KIT inhibitor, PKC inhibitor         |
| pseudoephedrine                 | trt_cp | BRD-K84175871 | ADRA1A, ADRA2A, ADRB1, ADRB2, ATF1, ATF2, ATF3, ATF4, ATF5, ATF6, ATF7, CXCL8, FOS, HRH1, IL2, JDP2, JUN, NFATC1, SLC6A2, SLC6A3, SLC6A4, TNF | Adrenergic receptor agonist                          |
| parthenolide                    | trt_cp | BRD-K98548675 | ADIPOR2, IKBKB, RELA                                                                                                                          | NFkB pathway inhibitor, Adiponectin receptor agonist |
| ibuprofen                       | trt_cp | BRD-K14965640 | PTGS2, PTGS1, ASIC1, BCL2, CFTR, CYP2C8, FABP2, PLAT, PPARG, SLC5A8, THBD                                                                     | Cyclooxygenase inhibitor                             |
| SB-202190                       | trt_cp | BRD-K54330070 | MAPK14, AKT1, ALOX5, CHEK1, GSK3B, LCK, MAPK1, MAPK11, MAPK12, MAPK8, PRKCA, ROCK1, RPS6KB1, SGK1                                             | p38 MAPK inhibitor                                   |
| SB-225002                       | trt_cp | BRD-K61323504 | CXCR2                                                                                                                                         | CC chemokine receptor antagonist                     |
| IKK-2-inhibitor                 | trt_cp | BRD-K26373640 | IKBKB                                                                                                                                         | IKK inhibitor, SYK inhibitor                         |
| SQ-22536                        | trt_cp | BRD-A56987319 | ADCY1, ADCY5                                                                                                                                  | Adenylyl cyclase inhibitor                           |
| semaxanib                       | trt_cp | BRD-K63504947 | KDR, FLT1, KIT, PDGFRB, FGFR1, FLT3, MET, PDGFRA, RET                                                                                         | VEGFR inhibitor                                      |
| 4,5,6,7-tetrabromobenzotriazole | trt_cp | BRD-K97118047 | CSNK2A1, AKT1, CHEK1, CSNK2A2, CSNK2B, GSK3B, LCK, MAP2K1, MAPK1, MAPK11, MAPK12, MAPK14, MAPK8, PRKCA, ROCK1, RPS6KB1, SGK1                  | Casein kinase inhibitor                              |
| tranilast                       | trt_cp | BRD-K19533706 | HPGDS, HRH1, IDO1, IFNG, IL10, IL2, IL4, SLC22A12, TGFB1, TNF, TRPV2                                                                          | Angiogenesis inhibitor                               |

|                   |        |               |                                                                                                                                |                                                                                  |
|-------------------|--------|---------------|--------------------------------------------------------------------------------------------------------------------------------|----------------------------------------------------------------------------------|
| U-0126            | trt_cp | BRD-K18787491 | AKT1, CHEK1, GSK3B, JAK2, LCK, MAP2K1, MAP2K2, MAP2K7, MAPK1, MAPK11, MAPK12, MAPK14, MAPK8, PRKCA, RAF1, ROCK1, RPS6KB1, SGK1 | MEK inhibitor                                                                    |
| gossypol          | trt_cp | BRD-K19295594 | BCL2, BCL2L1, MCL1, BCL2L2, CTGF, EGF                                                                                          | BCL inhibitor, MCL1 inhibitor                                                    |
| ABT-737           | trt_cp | BRD-K56301217 | BCL2, BCL2L1, BCL2L2                                                                                                           | BCL inhibitor                                                                    |
| navitoclax        | trt_cp | BRD-K82746043 | BCL2, BCL2L1, BCL2L2                                                                                                           | BCL inhibitor                                                                    |
| AKT-inhibitor-IV  | trt_cp | BRD-K28296557 | AKT1                                                                                                                           | AKT inhibitor                                                                    |
| AKT-inhibitor-1-2 | trt_cp | BRD-K04887706 | AKT1, AKT2, AKT3                                                                                                               | AKT inhibitor                                                                    |
| BMS-536924        | trt_cp | BRD-K34581968 | IGF1R, AKT1, CCNE1, CDK2, CYP3A4, ERBB2, INSR, KDR, LCK, MAPK1, MET, PDGFRA, PDGFRB                                            | IGF-1 inhibitor                                                                  |
| BMS-754807        | trt_cp | BRD-K13049116 | IGF1R, AKT1                                                                                                                    | IGF-1 inhibitor                                                                  |
| MK-2206           | trt_cp | BRD-K68065987 | AKT1, AKT2, AKT3                                                                                                               | AKT inhibitor                                                                    |
| fostamatinib      | trt_cp | BRD-K20285085 | SYK, FLT3, RET                                                                                                                 | SYK inhibitor                                                                    |
| TG-101348         | trt_cp | BRD-K12502280 | JAK2, FLT3, BRD4, JAK1, JAK3, RET, TYK2                                                                                        | FLT3 inhibitor, JAK inhibitor                                                    |
| TPCA-1            | trt_cp | BRD-K51575138 | IKBKB                                                                                                                          | IKK inhibitor                                                                    |
| TW-37             | trt_cp | BRD-K28360340 | BCL2, BCL2L1, MCL1                                                                                                             | BCL inhibitor                                                                    |
| auranofin         | trt_cp | BRD-A79465854 | IKBKB, PRDX5, TRPA1, TXNRD1, TXNRD2                                                                                            | NFkB pathway inhibitor                                                           |
| forskolin         | trt_cp | BRD-A70449690 | ADCY2, ADCY5, GNAS                                                                                                             | Adenylyl cyclase activator                                                       |
| myriocin          | trt_cp | BRD-A76279427 | AKT1, SPTLC1, SPTLC2, SPTLC3                                                                                                   | Serine palmitoyltransferase inhibitor                                            |
| HG-6-64-01        | trt_cp | BRD-U37049823 | ABL1, BRAF, CSF1R, EGFR, FGFR1, FLT3, KIT, MAPK11, PDGFRB, RET                                                                 | RAF inhibitor                                                                    |
| mesalazine        | trt_cp | BRD-K28849549 | PTGS1, PPARG, PTGS2, ALOX5, CHUK, CTNNB1, IKBKB, MPO, NAT1                                                                     | Cyclooxygenase inhibitor, Lipoxygenase inhibitor, Prostanoid receptor antagonist |

|                    |        |               |                                                                                                          |                                                                                                                                             |
|--------------------|--------|---------------|----------------------------------------------------------------------------------------------------------|---------------------------------------------------------------------------------------------------------------------------------------------|
| alvocidib          | trt_cp | BRD-K87909389 | CDK2, CDK4, CDK1, CDK6, CDK7, CDK9, CDK5, CDK8, EGFR, PYGM, BCL2, BIRC5, CCNT1, MCL1, XIAP               | CDK inhibitor                                                                                                                               |
| tozasertib         | trt_cp | BRD-K59369769 | AURKA, AURKB, ABL1, AURKC, BCR, FLT3, JAK2, DDR2, LCK                                                    | Aurora kinase inhibitor, BCR-ABL kinase inhibitor, FLT3 inhibitor, JAK inhibitor                                                            |
| parthenolide       | trt_cp | BRD-K28120222 | ADIPOR2, IKBKB, RELA                                                                                     | NFkB pathway inhibitor                                                                                                                      |
| sorafenib          | trt_cp | BRD-K49810818 | RET, BRAF, FLT3, KDR, RAF1, FLT1, FLT4, KIT, DDR2, FGFR1, PDGFRB, CYP2B6, CYP2C8, CYP3A5, PDGFB, SLCO1B3 | FLT3 inhibitor, KIT inhibitor, PDGFR receptor inhibitor, RAF inhibitor, VEGFR inhibitor, RET tyrosine kinase inhibitor                      |
| tandutinib         | trt_cp | BRD-K89162000 | FLT3, KIT, PDGFRA, PDGFRB, CSF1R, PDGFD                                                                  | FLT3 inhibitor, KIT inhibitor, PDGFR receptor inhibitor                                                                                     |
| obatoclox          | trt_cp | BRD-K15600710 | BCL2, BCL2L1, MCL1                                                                                       | BCL inhibitor                                                                                                                               |
| HA-14-1            | trt_cp | BRD-A13807286 | BCL2                                                                                                     | BCL inhibitor                                                                                                                               |
| docetaxel          | trt_cp | BRD-K63265447 | TUBB, BCL2, MAP2, MAP4, MAPT, NR1I2, TUBB1                                                               | Tubulin inhibitor                                                                                                                           |
| sulfasalazine      | trt_cp | BRD-K10670311 | PTGS1, PTGS2, ACAT1, ALOX5, CHUK, IKBKB, PLA2G1B, PPARG, SLC46A1, SLC7A11, TBXAS1                        | Antirheumatic, NFkB pathway inhibitor                                                                                                       |
| A-443644           | trt_cp | BRD-K38615104 | AKT1, AKT2, AKT3, CDC42BPB, GSK3B, PHKG1, PKIA, PRKACA                                                   | AKT inhibitor                                                                                                                               |
| withaferin-a       | trt_cp | BRD-A52193669 | ACHE, BCHE, IKBKB                                                                                        | IKK inhibitor                                                                                                                               |
| guggulsterone      | trt_cp | BRD-A59808129 | NR1H4, PGR, AR, ESR1, IKBKB, NR1I2, NR3C1, NR3C2                                                         | Cholesterol inhibitor, Estrogen receptor agonist, FXR antagonist, IKK inhibitor, Pregnane X receptor agonist, Progesterone receptor agonist |
| tyrphostin-AG-1295 | trt_cp | BRD-K57926513 | FLT3, KDR, PDGFRA, PDGFRB                                                                                | PDGFR receptor inhibitor                                                                                                                    |



|              |        |               |                                                                                                                                                              |                                                                                                         |
|--------------|--------|---------------|--------------------------------------------------------------------------------------------------------------------------------------------------------------|---------------------------------------------------------------------------------------------------------|
| SB-203580    | trt_cp | BRD-K99291625 | MAPK14, MAPK1, MAPK11, AKT1, ALOX5, CHEK1, CYP2D6, CYP3A4, GAK, GSK3B, LCK, MAPK10, MAPK12, MAPK8, MAPK9, PRKCA, RAF1, RIPK2, ROCK1, RPS6KB1, SGK1, SRC, TNF | p38 MAPK inhibitor                                                                                      |
| GR-235       | trt_cp | BRD-K26674531 | ESR1, IKBKB, NR1H4, NR1I2, PGR                                                                                                                               | Estrogen receptor agonist, FXR antagonist, Progesterone receptor agonist                                |
| enzastaurin  | trt_cp | BRD-K79404599 | PRKCB, AKT1, GSK3B, PRKCA, PRKCD, PRKCG                                                                                                                      | PKC inhibitor                                                                                           |
| BMS-345541   | trt_cp | BRD-K13566078 | IKBKB, CHUK                                                                                                                                                  | IKK inhibitor                                                                                           |
| BX-912       | trt_cp | BRD-K49669041 | PDPK1, AKT2, CDK2, CHEK1, GSK3B, KDR, PDK1                                                                                                                   | Pyruvate dehydrogenase kinase inhibitor                                                                 |
| quizartinib  | trt_cp | BRD-K93918653 | FLT3, CSF1R, KIT, RET, PDGFRA, PDGFRB                                                                                                                        | FLT3 inhibitor                                                                                          |
| lestaurtinib | trt_cp | BRD-K23192422 | FLT3, NTRK1, JAK2, NTRK2, NTRK3                                                                                                                              | FLT3 inhibitor, Growth factor receptor inhibitor, JAK inhibitor                                         |
| linifanib    | trt_cp | BRD-K99749624 | CSF1R, KDR, PDGFRB, FLT1, FLT3, FLT4, CSF1, KIT, PDGFRA, RET, TEK                                                                                            | PDGFR receptor inhibitor, VEGFR inhibitor                                                               |
| cediranib    | trt_cp | BRD-K86930074 | KDR, FLT1, FLT4, KIT, PDGFRB, CSF1R, FLT3, PDGFRA                                                                                                            | KIT inhibitor, VEGFR inhibitor                                                                          |
| dovitinib    | trt_cp | BRD-K85402309 | EGFR, FGFR3, PDGFRB, CSF1R, FGFR1, FGFR2, FLT1, FLT3, FLT4, INSR, KDR, KIT, PDGFRA                                                                           | EGFR inhibitor, FLT3 inhibitor, FGFR inhibitor, PDGFR receptor inhibitor, VEGFR inhibitor               |
| canertinib   | trt_cp | BRD-K50168500 | EGFR, ERBB2, ERBB4, AKT1                                                                                                                                     | EGFR inhibitor                                                                                          |
| sunitinib    | trt_cp | BRD-M64432851 | FLT3, KDR, KIT, FLT4, FLT1, PDGFRA, PDGFRB, RET, CSF1R, FGFR1                                                                                                | FLT3 inhibitor, KIT inhibitor, PDGFR receptor inhibitor, RET tyrosine kinase inhibitor, VEGFR inhibitor |
| cinacalcet   | trt_cp | BRD-K73838513 | CASR                                                                                                                                                         | Calcium channel activator                                                                               |
| sunitinib    | trt_cp | BRD-K70511574 | FLT3, KDR, KIT, FLT4, FLT1, PDGFRA, PDGFRB, RET, CSF1R, FGFR1                                                                                                | PLK inhibitor                                                                                           |
| rivaroxaban  | trt_cp | BRD-K37130656 | F10, CYP2J2, CYP3A5                                                                                                                                          | Coagulation inhibitor                                                                                   |

|                     |            |                    |                                                                                                                                                                                                                                 |                                      |
|---------------------|------------|--------------------|---------------------------------------------------------------------------------------------------------------------------------------------------------------------------------------------------------------------------------|--------------------------------------|
| cyclophosphamide    | trt_cp     | BRD-A09722536      | BCL2, CYP2B6, CYP2C19, CYP3A5, LGALS1                                                                                                                                                                                           | DNA alkylating agent                 |
| 4-hydroxy-2-nonenal | trt_cp     | BRD-A15914070      | IKBKB                                                                                                                                                                                                                           | Cytotoxic lipid peroxidation product |
| aspirin             | trt_cp     | BRD-K11433652      | PTGS1, PTGS2, TP53, AKR1C1, ASIC3, EDNRA, HSPA5, IKBKB, NFKB1, NFKB2, NFKBIA, PRKAA1, PRKAA2, PRKAB1, PRKAB2, PRKAG1, PRKAG2, PRKAG3, RPS6KA3                                                                                   | Cyclooxygenase inhibitor             |
| staurosporine       | trt_cp     | BRD-K17953061      | CDK2, GSK3B, CAMK2B, CDK1, CDK5, CHEK1, CHRM1, CHRM2, CHRM4, CSK, DAPK1, GPR35, IKBKB, ITK, LCK, LRRK2, MAP2K4, MAP2K6, MAPKAPK2, PAK2, PDPK1, PHKG2, PIK3CG, PIM1, PKN1, PRKACB, PRKCI, PRKCQ, RPS6KA1, STK3, SYK, TNIK, ZAP70 | PKC inhibitor                        |
| edaravone           | trt_cp     | BRD-K35458079      | BCL2                                                                                                                                                                                                                            | Nootropic agent                      |
| vidarabine          | trt_cp     | BRD-K72093121      | ADCY5                                                                                                                                                                                                                           | Antiviral                            |
| AKT1                | trt_oe     | ccsbBroad304_00046 |                                                                                                                                                                                                                                 |                                      |
| AKT2                | trt_oe     | ccsbBroad304_00047 |                                                                                                                                                                                                                                 |                                      |
| CD19                | trt_oe     | ccsbBroad304_00250 |                                                                                                                                                                                                                                 |                                      |
| CXCR2               | trt_oe     | ccsbBroad304_00856 |                                                                                                                                                                                                                                 |                                      |
| F10                 | trt_oe     | ccsbBroad304_06188 |                                                                                                                                                                                                                                 |                                      |
| GNAI1               | trt_oe     | ccsbBroad304_06291 |                                                                                                                                                                                                                                 |                                      |
| IFNGR1              | trt_oe     | ccsbBroad304_00834 |                                                                                                                                                                                                                                 |                                      |
| IKBKB               | trt_oe     | ccsbBroad304_00841 |                                                                                                                                                                                                                                 |                                      |
| IL2                 | trt_oe     | ccsbBroad304_00846 |                                                                                                                                                                                                                                 |                                      |
| ADCY5               | trt_sh.cgs | CGS001-111         |                                                                                                                                                                                                                                 |                                      |
| CALML6              | trt_sh.cgs | CGS001-163688      |                                                                                                                                                                                                                                 |                                      |
| AKT1                | trt_sh.cgs | CGS001-207         |                                                                                                                                                                                                                                 |                                      |
| AKT2                | trt_sh.cgs | CGS001-208         |                                                                                                                                                                                                                                 |                                      |
| F5                  | trt_sh.cgs | CGS001-2153        |                                                                                                                                                                                                                                 |                                      |
| F10                 | trt_sh.cgs | CGS001-2159        |                                                                                                                                                                                                                                 |                                      |
| GPRC6A              | trt_sh.cgs | CGS001-222545      |                                                                                                                                                                                                                                 |                                      |
| FLT3                | trt_sh.cgs | CGS001-2322        |                                                                                                                                                                                                                                 |                                      |
| GNAI1               | trt_sh.cgs | CGS001-2770        |                                                                                                                                                                                                                                 |                                      |
| GRK5                | trt_sh.cgs | CGS001-2869        |                                                                                                                                                                                                                                 |                                      |
| IFNGR1              | trt_sh.cgs | CGS001-3459        |                                                                                                                                                                                                                                 |                                      |
| IKBKB               | trt_sh.cgs | CGS001-3551        |                                                                                                                                                                                                                                 |                                      |

|                     |            |                |                                                                                                                                                                                                                                                                       |                                                                                                                                              |
|---------------------|------------|----------------|-----------------------------------------------------------------------------------------------------------------------------------------------------------------------------------------------------------------------------------------------------------------------|----------------------------------------------------------------------------------------------------------------------------------------------|
| IL2                 | trt_sh.cgs | CGS001-3558    |                                                                                                                                                                                                                                                                       |                                                                                                                                              |
| CXCR2               | trt_sh.cgs | CGS001-3579    |                                                                                                                                                                                                                                                                       |                                                                                                                                              |
| BCL2                | trt_sh.cgs | CGS001-596     |                                                                                                                                                                                                                                                                       |                                                                                                                                              |
| CD19                | trt_sh.cgs | CGS001-930     |                                                                                                                                                                                                                                                                       |                                                                                                                                              |
| AT-9283             | trt_cp     | BRD-K24576554  | AURKA, AURKB, ABL1, BCR, FLT3, JAK2, JAK3, RPS6KA6, STK17A                                                                                                                                                                                                            | JAK inhibitor, Aurora kinase inhibitor, ABL inhibitor, BCR-ABL kinase inhibitor, FLT3 inhibitor, Mitotic inhibitor, Protein kinase inhibitor |
| ENMD-2076           | trt_cp     | BRD-K68488863  | AURKA, FLT3, KDR, PDGFRA, SRC, CSF1R, EPHA1, FGFR1, FGFR2, FGFR3, FLT4, KIT, PTK2                                                                                                                                                                                     | FLT3 inhibitor, VEGFR inhibitor, Aurora kinase inhibitor                                                                                     |
| Name                | Type       | Perturbagen Id | Target                                                                                                                                                                                                                                                                | MOA                                                                                                                                          |
| BMY-45778           | trt_cp     | BRD-K84895041  | PTGIR                                                                                                                                                                                                                                                                 | IP1 prostacyclin receptor agonist                                                                                                            |
| bisindolylmaleimide | trt_cp     | BRD-K49448285  | CCND1, CDK4, LRRK2, PDPK1, PIM1, PRKCA, PRKCB, PRKCI, PRKCZ                                                                                                                                                                                                           | CDK inhibitor                                                                                                                                |
| caffeine            | trt_cp     | BRD-K02404261  | ADORA1, ADORA2A, ADORA2B, ATM, ITPR1, RYR1, ADORA3, ATR, ITPR2, ITPR3, PDE10A, PDE11A, PDE1A, PDE1B, PDE1C, PDE2A, PDE3A, PDE3B, PDE4A, PDE4B, PDE4C, PDE4D, PDE5A, PDE6A, PDE6B, PDE6C, PDE7A, PDE7B, PDE8A, PDE8B, PDE9A, PIK3CA, PIK3CB, PIK3CD, PRKDC, RYR2, RYR3 | Adenosine receptor antagonist, Diuretic, Phosphodiesterase inhibitor                                                                         |
| celecoxib           | trt_cp     | BRD-K02637541  | PTGS2, CA12, CASP3, CYP2C19, PDPK1                                                                                                                                                                                                                                    | Cyclooxygenase inhibitor                                                                                                                     |
| colforsin           | trt_cp     | BRD-A55416093  | ADCY2, ADCY5, GNAS                                                                                                                                                                                                                                                    | Adenylyl cyclase activator, Adenylate cyclase stimulant                                                                                      |
| dorsomorphin        | trt_cp     | BRD-K54233340  | ACVR1, BMPR1A, BMPR1B, EPHA2, FKBP1A, FLT1, FLT3, KDR, LCK, MKNK1, PRKAA1, RPS6KA1, SRC                                                                                                                                                                               | AMPK inhibitor                                                                                                                               |
| indoprofen          | trt_cp     | BRD-A44090213  | PTGS1, PTGS2, CXCR1, CXCR2                                                                                                                                                                                                                                            | Cyclooxygenase inhibitor, Prostanoid receptor antagonist                                                                                     |
| kawain              | trt_cp     | BRD-K09497549  | MTOR                                                                                                                                                                                                                                                                  | Calcium channel modulator, MTOR                                                                                                              |

|                    |        |               |                                                                                                                                                      |                                                                                                                    |
|--------------------|--------|---------------|------------------------------------------------------------------------------------------------------------------------------------------------------|--------------------------------------------------------------------------------------------------------------------|
|                    |        |               |                                                                                                                                                      | inhibitor, Sodium channel blocker                                                                                  |
| LY-294002          | trt_cp | BRD-K27305650 | MTOR, PIK3CD, PIK3CG, PIK3CA, PIK3CB, PLK1, PRKDC, AKT1, CHEK1, GSK3B, LCK, MAPK1, MAPK11, MAPK12, MAPK14, MAPK8, PDE2A, PRKCA, ROCK1, RPS6KB1, SGK1 | MTOR inhibitor, PI3K inhibitor, DNA dependent protein kinase inhibitor, Phosphodiesterase inhibitor, PLK inhibitor |
| LY-83583           | trt_cp | BRD-K62792802 | GUCY1A2                                                                                                                                              | Guanylyl cyclase inhibitor                                                                                         |
| menadione          | trt_cp | BRD-K78126613 | AOX1, BGLAP, F10, F2, F7, F9, GGCX, NQO1, NQO2, PKM, PROC, PROS1, PROZ, VKORC1, VKORC1L1                                                             | Mitochondrial DNA polymerase inhibitor, Phosphatase inhibitor                                                      |
| mepacrine          | trt_cp | BRD-A45889380 | TP53, AKT1, MTOR, NFKB1, PLA2G1B, PLA2G2A, PLA2G2D, PLA2G4A, PLA2G6, PLCL1                                                                           | Cytokine production inhibitor, NFkB pathway inhibitor, TP53 activator                                              |
| TCS-359            | trt_cp | BRD-K81376179 | FLT3                                                                                                                                                 | FLT3 inhibitor                                                                                                     |
| tricitiribine      | trt_cp | BRD-K80431395 | AKT1, AKT2, AKT3                                                                                                                                     | AKT inhibitor                                                                                                      |
| tamoxifen          | trt_cp | BRD-K04210847 | ESR1, ESR2, CYP3A5, EBP, GPER1, PRKCA, PRKCB, PRKCD, PRKCE, PRKCG, PRKCI, PRKCQ, PRKCZ                                                               | Estrogen receptor antagonist, Selective estrogen receptor modulator (SERM)                                         |
| trequinsin         | trt_cp | BRD-K84663978 | PDE4A, PDE4B, PDE4C, PDE4D, PDE5A, PTGIR                                                                                                             | Phosphodiesterase inhibitor                                                                                        |
| wortmannin         | trt_cp | BRD-A11678676 | PIK3CA, PIK3CG, PLK1, ATM, ATR, MTOR, PI4KA, PI4KB, PIK3CD, PIK3R1, PLK3, PRKDC                                                                      | PI3K inhibitor                                                                                                     |
| manumycin-a        | trt_cp | BRD-K78599730 | FNTA, IKBKB                                                                                                                                          | Farnesyltransferase inhibitor, NFkB pathway inhibitor                                                              |
| rutin              | trt_cp | BRD-K20482099 | AKR1C3, AKR1B1, F10                                                                                                                                  | Antioxidant, Capillary stabilizing agent, Nitric oxide scavenger                                                   |
| tyrphostin-AG-1296 | trt_cp | BRD-K76064317 | FLT3                                                                                                                                                 | FLT3 inhibitor                                                                                                     |
| prostaglandin-e1   | trt_cp | BRD-K52459643 | PTGER1, PTGER2, CATSPER1, CATSPER2, CATSPER3, CATSPER4, PTGDR, PTGER4, PTGIR                                                                         | Prostanoid receptor agonist                                                                                        |

|                   |        |               |                                                                                                                                                                       |                                                         |
|-------------------|--------|---------------|-----------------------------------------------------------------------------------------------------------------------------------------------------------------------|---------------------------------------------------------|
| carbacyclin       | trt_cp | BRD-K27499107 | PPARD, PTGDR, PTGER1, PTGER2, PTGER3, PTGER4, PTGFR, PTGIR, TBXA2R                                                                                                    | IP receptor activator, PPAR receptor agonist            |
| CGP-53353         | trt_cp | BRD-K32292990 | EGFR, PRKCB                                                                                                                                                           | EGFR inhibitor, PKC inhibitor                           |
| dextromethorphan  | trt_cp | BRD-K33211335 | SIGMAR1, CHRNA2, CHRNA3, CHRNA4, CHRNA7, CHRNA2, CHRNA4, CYBA, CYBB, CYP3A5, GRIN1, GRIN3A, NCF1, NCF2, NCF4, OPRD1, OPRK1, OPRM1, PGRMC1, RAC1, RAC2, SLC6A2, SLC6A4 | Glutamate receptor antagonist, Sigma receptor agonist   |
| GTP-14564         | trt_cp | BRD-K16664969 | FLT3, CSF1R, KIT, PDGFRB                                                                                                                                              | FLT3 inhibitor, Tyrosine kinase inhibitor               |
| hispidin          | trt_cp | BRD-K07325606 | PREP, PRKCB, PTGS2, XDH                                                                                                                                               | PKC inhibitor                                           |
| IKK-16            | trt_cp | BRD-K14618467 | IKBKB                                                                                                                                                                 | IKK inhibitor                                           |
| IKK-2-inhibitor-V | trt_cp | BRD-K74305673 | IKBKB                                                                                                                                                                 | IKK inhibitor, NFkB pathway inhibitor                   |
| kavain            | trt_cp | BRD-A75455249 | MTOR                                                                                                                                                                  | Calcium channel modulator, Sodium channel blocker       |
| LY-303511         | trt_cp | BRD-K22385716 | CSNK2A1, CSNK2A2, CSNK2B, MTOR                                                                                                                                        | Casein kinase inhibitor, MTOR inhibitor, PI3K inhibitor |
| MEK1-2-inhibitor  | trt_cp | BRD-K12244279 | MAP2K1, MAP2K2                                                                                                                                                        | MEK inhibitor                                           |
| ODQ               | trt_cp | BRD-K26015241 | GUCY1A2, GUCY1A3, GUCY1B3                                                                                                                                             | Guanylyl cyclase inhibitor                              |
| oxindole-I        | trt_cp | BRD-K51816706 | AKT1, KDR, PDPK1, RET                                                                                                                                                 | VEGFR inhibitor                                         |
| PD-198306         | trt_cp | BRD-K88677950 | MAP2K1, MAP2K2, MAPK1, MAPK3                                                                                                                                          | MAP kinase inhibitor, MEK inhibitor                     |
| PD-98059          | trt_cp | BRD-K62810658 | MAP2K1, AKT1, CHEK1, GSK3B, LCK, MAP2K2, MAPK1, MAPK11, MAPK12, MAPK14, MAPK3, MAPK8, PRKCA, RAF1, ROCK1, RPS6KB1, SGK1                                               | MEK inhibitor, MAP kinase inhibitor                     |
| D-64406           | trt_cp | BRD-K27665173 | FLT3, PDGFRA, PDGFRB                                                                                                                                                  | PDGFR receptor inhibitor                                |
| PIT               | trt_cp | BRD-K43978949 | P2RY1                                                                                                                                                                 | Purinergic receptor antagonist                          |
| midostaurin       | trt_cp | BRD-K13646352 | FLT3, KIT, CCNB1, FLT1, KDR, PDGFRB, PRKCA, PRKCG, VEGFA                                                                                                              | FLT3 inhibitor, KIT inhibitor, PKC inhibitor            |

|                 |        |               |                                                                                                                                               |                                                          |
|-----------------|--------|---------------|-----------------------------------------------------------------------------------------------------------------------------------------------|----------------------------------------------------------|
| pseudoephedrine | trt_cp | BRD-K84175871 | ADRA1A, ADRA2A, ADRB1, ADRB2, ATF1, ATF2, ATF3, ATF4, ATF5, ATF6, ATF7, CXCL8, FOS, HRH1, IL2, JDP2, JUN, NFATC1, SLC6A2, SLC6A3, SLC6A4, TNF | Adrenergic receptor agonist                              |
| parthenolide    | trt_cp | BRD-K98548675 | ADIPOR2, IKBKB, RELA                                                                                                                          | NFkB pathway inhibitor, Adiponectin receptor agonist     |
| quercetin       | trt_cp | BRD-K97399794 | PIK3CG, AKR1B1, ATP5A1, ATP5B, ATP5C1, CYP2C8, EGFR, GAA, HCK, HIBCH, MAOA, PIM1, PTPN1, SCN5A, SIRT1, STK17B, UGT3A1, XDH                    | Polar auxin transport inhibitor                          |
| SB-225002       | trt_cp | BRD-K61323504 | CXCR2                                                                                                                                         | CC chemokine receptor antagonist                         |
| IKK-2-inhibitor | trt_cp | BRD-K26373640 | IKKBK                                                                                                                                         | IKK inhibitor, SYK inhibitor                             |
| SA-792728       | trt_cp | BRD-K20755323 | SPHK1, VCP                                                                                                                                    | Sphingosine kinase inhibitor                             |
| SQ-22536        | trt_cp | BRD-A56987319 | ADCY1, ADCY5                                                                                                                                  | Adenylyl cyclase inhibitor                               |
| semaxanib       | trt_cp | BRD-K63504947 | KDR, FLT1, KIT, PDGFRB, FGFR1, FLT3, MET, PDGFRA, RET                                                                                         | VEGFR inhibitor                                          |
| tranilast       | trt_cp | BRD-K19533706 | HPGDS, HRH1, IDO1, IFNG, IL10, IL2, IL4, SLC22A12, TGFB1, TNF, TRPV2                                                                          | Angiogenesis inhibitor                                   |
| U-0126          | trt_cp | BRD-K18787491 | AKT1, CHEK1, GSK3B, JAK2, LCK, MAP2K1, MAP2K2, MAP2K7, MAPK1, MAPK11, MAPK12, MAPK14, MAPK8, PRKCA, RAF1, ROCK1, RPS6KB1, SGK1                | MEK inhibitor                                            |
| U-46619         | trt_cp | BRD-K18757346 | PTGDR, PTGDR2, PTGER1, PTGER2, PTGER3, PTGER4, PTGFR, PTGIR, TBXA2R                                                                           | Thromboxane receptor agonist                             |
| YC-1            | trt_cp | BRD-K60476892 | HIF1A, GUCY1A2, GUCY1A3, GUCY1B3                                                                                                              | Guanylyl cyclase activator                               |
| dactolisib      | trt_cp | BRD-K12184916 | MTOR, PIK3CA, PIK3CG, PIK3CD, ATR, PIK3CB                                                                                                     | MTOR inhibitor, PI3K inhibitor, Protein kinase inhibitor |
| selumetinib     | trt_cp | BRD-K57080016 | MAP2K1, MAP2K2                                                                                                                                | MEK inhibitor                                            |
| AS-605240       | trt_cp | BRD-K41895714 | MAOB, PIK3CA, PIK3CB, PIK3CD, PIK3CG                                                                                                          | PI3K inhibitor                                           |

|                   |        |               |                                                                                               |                                                                                  |
|-------------------|--------|---------------|-----------------------------------------------------------------------------------------------|----------------------------------------------------------------------------------|
| AZD-8055          | trt_cp | BRD-K69932463 | MTOR                                                                                          | MTOR inhibitor                                                                   |
| AKT-inhibitor-1-2 | trt_cp | BRD-K04887706 | AKT1, AKT2, AKT3                                                                              | AKT inhibitor                                                                    |
| BX-795            | trt_cp | BRD-K47983010 | PDPK1, CDK2, CHEK1, GSK3B, IKBKE, KDR, PDK1, TBK1                                             | IKK inhibitor                                                                    |
| KU-0060648        | trt_cp | BRD-K09499853 | PIK3CA, PIK3CB, PIK3CD, PIK3CG, PRKDC                                                         | DNA dependent protein kinase inhibitor, PI3K inhibitor                           |
| KU-0063794        | trt_cp | BRD-K67566344 | MTOR                                                                                          | MTOR inhibitor                                                                   |
| MK-2206           | trt_cp | BRD-K68065987 | AKT1, AKT2, AKT3                                                                              | AKT inhibitor                                                                    |
| PI-103            | trt_cp | BRD-K67868012 | PIK3CA, PIK3CG, MTOR, PIK3CB, PIK3CD, PRKDC                                                   | MTOR inhibitor, PI3K inhibitor                                                   |
| PKCbeta-inhibitor | trt_cp | BRD-K89687904 | PRKCB                                                                                         | PKC inhibitor                                                                    |
| fostamatinib      | trt_cp | BRD-K20285085 | SYK, FLT3, RET                                                                                | SYK inhibitor                                                                    |
| TG-101348         | trt_cp | BRD-K12502280 | JAK2, FLT3, BRD4, JAK1, JAK3, RET, TYK2                                                       | FLT3 inhibitor, JAK inhibitor                                                    |
| TPCA-1            | trt_cp | BRD-K51575138 | IKBKB                                                                                         | IKK inhibitor                                                                    |
| auranofin         | trt_cp | BRD-A79465854 | IKBKB, PRDX5, TRPA1, TXNRD1, TXNRD2                                                           | NFkB pathway inhibitor                                                           |
| forskolin         | trt_cp | BRD-A70449690 | ADCY2, ADCY5, GNAS                                                                            | Adenylyl cyclase activator                                                       |
| temsirolimus      | trt_cp | BRD-A62025033 | MTOR, PTEN                                                                                    | MTOR inhibitor                                                                   |
| myricetin         | trt_cp | BRD-K43149758 | PIK3CG, AR, CYP3A4                                                                            | Androgen receptor agonist, Cytochrome P450 inhibitor                             |
| HG-6-64-01        | trt_cp | BRD-U37049823 | ABL1, BRAF, CSF1R, EGFR, FGFR1, FLT3, KIT, MAPK11, PDGFRB, RET                                | RAF inhibitor                                                                    |
| treprostinil      | trt_cp | BRD-A67438293 | PTGIR, CYP2C8, P2RY12, PPARD, PTGDR, PTGER1, PTGER2, PTGER3, PTGER4                           | Prostacyclin analog                                                              |
| iloprost          | trt_cp | BRD-A45664787 | PTGIR, PTGER1, PTGER2, PDE4A, PDE4B, PDE4C, PDE4D, PLAT, PTGDR, PTGER3, PTGER4, PTGFR, TBXA2R | Platelet aggregation inhibitor, Prostanoid receptor agonist                      |
| mesalazine        | trt_cp | BRD-K28849549 | PTGS1, PPARG, PTGS2, ALOX5, CHUK, CTNNB1, IKBKB, MPO, NAT1                                    | Cyclooxygenase inhibitor, Lipoxygenase inhibitor, Prostanoid receptor antagonist |

|               |        |               |                                                                                                          |                                                                                                                        |
|---------------|--------|---------------|----------------------------------------------------------------------------------------------------------|------------------------------------------------------------------------------------------------------------------------|
| sirolimus     | trt_cp | BRD-K89626439 | MTOR, FKBP1A, CCR5, FGF2                                                                                 | MTOR inhibitor                                                                                                         |
| tozasertib    | trt_cp | BRD-K59369769 | AURKA, AURKB, ABL1, AURKC, BCR, FLT3, JAK2, DDR2, LCK                                                    | Aurora kinase inhibitor, BCR-ABL kinase inhibitor, FLT3 inhibitor, JAK inhibitor                                       |
| parthenolide  | trt_cp | BRD-K28120222 | ADIPOR2, IKBKB, RELA                                                                                     | NFkB pathway inhibitor                                                                                                 |
| sorafenib     | trt_cp | BRD-K49810818 | RET, BRAF, FLT3, KDR, RAF1, FLT1, FLT4, KIT, DDR2, FGFR1, PDGFRB, CYP2B6, CYP2C8, CYP3A5, PDGFB, SLCO1B3 | FLT3 inhibitor, KIT inhibitor, PDGFR receptor inhibitor, RAF inhibitor, VEGFR inhibitor, RET tyrosine kinase inhibitor |
| PD-184352     | trt_cp | BRD-K05104363 | MAP2K1, MAP2K2, MAP3K1, MAP3K2                                                                           | MEK inhibitor                                                                                                          |
| deforolimus   | trt_cp | BRD-K29733039 | MTOR                                                                                                     | MTOR inhibitor                                                                                                         |
| PD-0325901    | trt_cp | BRD-K49865102 | MAP2K1, MAP2K2                                                                                           | MEK inhibitor, MAP kinase inhibitor, Protein kinase inhibitor                                                          |
| tandutinib    | trt_cp | BRD-K89162000 | FLT3, KIT, PDGFRA, PDGFRB, CSF1R, PDGFD                                                                  | FLT3 inhibitor, KIT inhibitor, PDGFR receptor inhibitor                                                                |
| ZSTK-474      | trt_cp | BRD-K63068307 | PIK3CG, PIK3CA, PIK3CB, PIK3CD                                                                           | PI3K inhibitor                                                                                                         |
| TG100-115     | trt_cp | BRD-K64785675 | PIK3CG, PIK3CA, PIK3CB, PIK3CD                                                                           | -666                                                                                                                   |
| sulfasalazine | trt_cp | BRD-K10670311 | PTGS1, PTGS2, ACAT1, ALOX5, CHUK, IKBKB, PLA2G1B, PPARG, SLC46A1, SLC7A11, TBXAS1                        | Antirheumatic, NFkB pathway inhibitor                                                                                  |
| KIN001-244    | trt_cp | BRD-K09186807 | PDPK1                                                                                                    | Phosphoinositide dependent kinase inhibitor                                                                            |
| A-443644      | trt_cp | BRD-K38615104 | AKT1, AKT2, AKT3, CDC42BPB, GSK3B, PHKG1, PKIA, PRKACA                                                   | AKT inhibitor                                                                                                          |
| torin-1       | trt_cp | BRD-K40175214 | MTOR, PIK3CA                                                                                             | MTOR inhibitor, PI3K inhibitor                                                                                         |
| GDC-0941      | trt_cp | BRD-K52911425 | PIK3CG, PIK3CA, PIK3CB, PIK3CD                                                                           | PI3K inhibitor                                                                                                         |
| torin-2       | trt_cp | BRD-K68174511 | MTOR                                                                                                     | MTOR inhibitor                                                                                                         |
| QL-X-138      | trt_cp | BRD-U33728988 | BTK, JAK3, MKNK2, MTOR, PRKDC                                                                            | MTOR inhibitor                                                                                                         |
| AS-604850     | trt_cp | BRD-K63915849 | PIK3CG, PIK3CA                                                                                           | PI3K inhibitor                                                                                                         |



|                    |        |               |                                                                                                                         |                                                                                                                                                                  |
|--------------------|--------|---------------|-------------------------------------------------------------------------------------------------------------------------|------------------------------------------------------------------------------------------------------------------------------------------------------------------|
| withaferin-a       | trt_cp | BRD-A52193669 | ACHE, BCHE, IKBKB                                                                                                       | IKK inhibitor<br><br>Cholesterol inhibitor, Estrogen receptor agonist, FXR antagonist, IKK inhibitor, Pregnane X receptor agonist, Progesterone receptor agonist |
| guggulsterone      | trt_cp | BRD-A59808129 | NR1H4, PGR, AR, ESR1, IKBKB, NR1I2, NR3C1, NR3C2                                                                        |                                                                                                                                                                  |
| OSI-027            | trt_cp | BRD-K94294671 | MTOR                                                                                                                    | MTOR inhibitor                                                                                                                                                   |
| tyrphostin-AG-1295 | trt_cp | BRD-K57926513 | FLT3, KDR, PDGFRA, PDGFRB                                                                                               | PDGFR receptor inhibitor                                                                                                                                         |
| GR-235             | trt_cp | BRD-K26674531 | ESR1, IKBKB, NR1H4, NR1I2, PGR                                                                                          | Estrogen receptor agonist, FXR antagonist, Progesterone receptor agonist                                                                                         |
| WYE-125132         | trt_cp | BRD-A45498368 | MTOR, PIK3CA                                                                                                            | MTOR inhibitor                                                                                                                                                   |
| enzastaurin        | trt_cp | BRD-K79404599 | PRKCB, AKT1, GSK3B, PRKCA, PRKCD, PRKCG                                                                                 | PKC inhibitor                                                                                                                                                    |
| AZD-6482           | trt_cp | BRD-K58772419 | PIK3CD, PIK3CG, PIK3CA, PIK3CB                                                                                          | PI3K inhibitor                                                                                                                                                   |
| BMS-345541         | trt_cp | BRD-K13566078 | IKBKB, CHUK                                                                                                             | IKK inhibitor                                                                                                                                                    |
| BX-912             | trt_cp | BRD-K49669041 | PDPK1, AKT2, CDK2, CHEK1, GSK3B, KDR, PDK1                                                                              | Pyruvate dehydrogenase kinase inhibitor                                                                                                                          |
| quizartinib        | trt_cp | BRD-K93918653 | FLT3, CSF1R, KIT, RET, PDGFRA, PDGFRB                                                                                   | FLT3 inhibitor                                                                                                                                                   |
| lestaurtinib       | trt_cp | BRD-K23192422 | FLT3, NTRK1, JAK2, NTRK2, NTRK3                                                                                         | FLT3 inhibitor, Growth factor receptor inhibitor, JAK inhibitor                                                                                                  |
| linifanib          | trt_cp | BRD-K99749624 | CSF1R, KDR, PDGFRB, FLT1, FLT3, FLT4, CSF1, KIT, PDGFRA, RET, TEK                                                       | PDGFR receptor inhibitor, VEGFR inhibitor                                                                                                                        |
| bosutinib          | trt_cp | BRD-K99964838 | ABL1, SRC, BCR, CAMK2G, LYN, CAMK1D, CDK2, FRK, FYN, HCK, MAP2K1, MAP2K2, MAP3K2, MAP4K5, STK10, STK24, STK4, TNK2, TXK | ABL inhibitor, BCR-ABL kinase inhibitor, SRC inhibitor                                                                                                           |
| cediranib          | trt_cp | BRD-K86930074 | KDR, FLT1, FLT4, KIT, PDGFRB, CSF1R, FLT3, PDGFRA                                                                       | KIT inhibitor, VEGFR inhibitor                                                                                                                                   |
| dovitinib          | trt_cp | BRD-K85402309 | EGFR, FGFR3, PDGFRB, CSF1R, FGFR1, FGFR2, FLT1, FLT3, FLT4, INSR, KDR, KIT, PDGFRA                                      | EGFR inhibitor, FLT3 inhibitor, FGFR inhibitor, PDGFR receptor inhibitor, VEGFR inhibitor                                                                        |

|                     |        |               |                                                                                                                                                                                                                                 |                                                                                                         |
|---------------------|--------|---------------|---------------------------------------------------------------------------------------------------------------------------------------------------------------------------------------------------------------------------------|---------------------------------------------------------------------------------------------------------|
| sunitinib           | trt_cp | BRD-M64432851 | FLT3, KDR, KIT, FLT4, FLT1, PDGFRA, PDGFRB, RET, CSF1R, FGFR1                                                                                                                                                                   | FLT3 inhibitor, KIT inhibitor, PDGFR receptor inhibitor, RET tyrosine kinase inhibitor, VEGFR inhibitor |
| XL-147              | trt_cp | BRD-K95901403 | PIK3CA, PIK3CD, PIK3CG                                                                                                                                                                                                          | PI3K inhibitor                                                                                          |
| everolimus          | trt_cp | BRD-K13514097 | MTOR, CYP3A5, FKBP1A                                                                                                                                                                                                            | MTOR inhibitor                                                                                          |
| TGX-221             | trt_cp | BRD-A41692738 | PIK3CB, PIK3CD                                                                                                                                                                                                                  | PI3K inhibitor                                                                                          |
| PIK-75              | trt_cp | BRD-M16762496 | PIK3CA, PIK3CB, PIK3CD, PIK3CG, PRKDC                                                                                                                                                                                           | DNA protein kinase inhibitor, PI3K inhibitor                                                            |
| WYE-354             | trt_cp | BRD-K77008974 | MTOR                                                                                                                                                                                                                            | MTOR inhibitor                                                                                          |
| AS-703026           | trt_cp | BRD-K89014967 | MAP2K1, MAP2K2                                                                                                                                                                                                                  | MEK inhibitor                                                                                           |
| sunitinib           | trt_cp | BRD-K70511574 | FLT3, KDR, KIT, FLT4, FLT1, PDGFRA, PDGFRB, RET, CSF1R, FGFR1                                                                                                                                                                   | PLK inhibitor                                                                                           |
| rivaroxaban         | trt_cp | BRD-K37130656 | F10, CYP2J2, CYP3A5                                                                                                                                                                                                             | Coagulation inhibitor                                                                                   |
| 4-hydroxy-2-nonenal | trt_cp | BRD-A15914070 | IKBKB                                                                                                                                                                                                                           | Cytotoxic lipid peroxidation product                                                                    |
| GSK-1059615         | trt_cp | BRD-K06750613 | PIK3CA, PIK3CG                                                                                                                                                                                                                  | PI3K inhibitor                                                                                          |
| aspirin             | trt_cp | BRD-K11433652 | PTGS1, PTGS2, TP53, AKR1C1, ASIC3, EDNRA, HSPA5, IKBKB, NFKB1, NFKB2, NFKBIA, PRKAA1, PRKAA2, PRKAB1, PRKAB2, PRKAG1, PRKAG2, PRKAG3, RPS6KA3                                                                                   | Cyclooxygenase inhibitor                                                                                |
| staurosporine       | trt_cp | BRD-K17953061 | CDK2, GSK3B, CAMK2B, CDK1, CDK5, CHEK1, CHRM1, CHRM2, CHRM4, CSK, DAPK1, GPR35, IKBKB, ITK, LCK, LRRK2, MAP2K4, MAP2K6, MAPKAPK2, PAK2, PDPK1, PHKG2, PIK3CG, PIM1, PKN1, PRKACB, PRKCI, PRKCQ, RPS6KA1, STK3, SYK, TNIK, ZAP70 | PKC inhibitor                                                                                           |
| prostratin          | trt_cp | BRD-K91145395 | PRKCA, PRKCB, PRKCD, PRKCE, PRKCG, PRKCH, PRKCQ                                                                                                                                                                                 | PKC activator                                                                                           |
| vidarabine          | trt_cp | BRD-K72093121 | ADCY5                                                                                                                                                                                                                           | Antiviral                                                                                               |

|        |            |                    |
|--------|------------|--------------------|
| AKT2   | trt_oe     | ccsbBroad304_00047 |
| CXCR2  | trt_oe     | ccsbBroad304_00856 |
| F10    | trt_oe     | ccsbBroad304_06188 |
| GNG4   | trt_oe     | ccsbBroad304_00657 |
| IKBKG  | trt_oe     | ccsbBroad304_01945 |
| IL13   | trt_oe     | ccsbBroad304_00860 |
| LSP1   | trt_oe     | ccsbBroad304_06538 |
| PDPK1  | trt_oe     | ccsbBroad304_01168 |
| PIK3CB | trt_oe     | ccsbBroad304_01202 |
| PIK3CG | trt_oe     | ccsbBroad304_06727 |
| PRKCB  | trt_oe     | ccsbBroad304_01282 |
| PRKCZ  | trt_oe     | ccsbBroad304_01284 |
| EPO    | trt_oe     | ccsbBroad304_00512 |
| HRAS   | trt_oe     | ccsbBroad304_00784 |
| IKBKB  | trt_oe     | ccsbBroad304_00841 |
| IL2    | trt_oe     | ccsbBroad304_00846 |
| ADCY5  | trt_sh.cgs | CGS001-111         |
| EPO    | trt_sh.cgs | CGS001-2056        |
| AKT2   | trt_sh.cgs | CGS001-208         |
| F5     | trt_sh.cgs | CGS001-2153        |
| F10    | trt_sh.cgs | CGS001-2159        |
| F12    | trt_sh.cgs | CGS001-2161        |
| GPRC6A | trt_sh.cgs | CGS001-222545      |
| FLT3   | trt_sh.cgs | CGS001-2322        |
| MTOR   | trt_sh.cgs | CGS001-2475        |
| GNG4   | trt_sh.cgs | CGS001-2786        |
| GRK5   | trt_sh.cgs | CGS001-2869        |
| HRAS   | trt_sh.cgs | CGS001-3265        |
| IKBKB  | trt_sh.cgs | CGS001-3551        |
| IL2    | trt_sh.cgs | CGS001-3558        |
| CXCR2  | trt_sh.cgs | CGS001-3579        |
| IL13   | trt_sh.cgs | CGS001-3596        |
| LSP1   | trt_sh.cgs | CGS001-4046        |
| MAF    | trt_sh.cgs | CGS001-4094        |
| PDPK1  | trt_sh.cgs | CGS001-5170        |
| PIK3CB | trt_sh.cgs | CGS001-5291        |
| PIK3CG | trt_sh.cgs | CGS001-5294        |
| POLR2K | trt_sh.cgs | CGS001-5440        |
| PRKCB  | trt_sh.cgs | CGS001-5579        |
| PRKCZ  | trt_sh.cgs | CGS001-5590        |
| MAP2K2 | trt_sh.cgs | CGS001-5605        |
| PXN    | trt_sh.cgs | CGS001-5829        |
| IKBKG  | trt_sh.cgs | CGS001-8517        |
| CDC42  | trt_sh.cgs | CGS001-998         |

|           |        |               |                                                                                   |                                                                                                                                              |
|-----------|--------|---------------|-----------------------------------------------------------------------------------|----------------------------------------------------------------------------------------------------------------------------------------------|
| AT-9283   | trt_cp | BRD-K24576554 | AURKA, AURKB, ABL1, BCR, FLT3, JAK2, JAK3, RPS6KA6, STK17A                        | JAK inhibitor, Aurora kinase inhibitor, ABL inhibitor, BCR-ABL kinase inhibitor, FLT3 inhibitor, Mitotic inhibitor, Protein kinase inhibitor |
| ENMD-2076 | trt_cp | BRD-K68488863 | AURKA, FLT3, KDR, PDGFRA, SRC, CSF1R, EPHA1, FGFR1, FGFR2, FGFR3, FLT4, KIT, PTK2 | FLT3 inhibitor, VEGFR inhibitor, Aurora kinase inhibitor                                                                                     |
| PF-543    | trt_cp | BRD-K79877282 | SPHK1                                                                             | Sphingosine kinase inhibitor                                                                                                                 |

Supplementary Table S11. Connectivity map analysis for GSE111907 LUSC.

| Name                | Type   | Perturbagen Id | Target                                                                                                                              | MOA                                                                        |
|---------------------|--------|----------------|-------------------------------------------------------------------------------------------------------------------------------------|----------------------------------------------------------------------------|
| bisindolylmaleimide | trt_cp | BRD-K49448285  | CCND1, CDK4, LRRK2, PDPK1, PIM1, PRKCA, PRKCB, PRKCI, PRKCZ                                                                         | CDK inhibitor                                                              |
| colforsin           | trt_cp | BRD-A55416093  | ADCY2, ADCY5, GNAS                                                                                                                  | Adenylyl cyclase activator, Adenylate cyclase stimulant                    |
| digoxin             | trt_cp | BRD-A94756469  | ATP1A1, ABCB1, RORC, SLCO1B3                                                                                                        | ATPase inhibitor                                                           |
| dorsomorphin        | trt_cp | BRD-K54233340  | ACVR1, BMPR1A, BMPR1B, EPHA2, FKBP1A, FLT1, FLT3, KDR, LCK, MKNK1, PRKAA1, RPS6KA1, SRC                                             | AMPK inhibitor                                                             |
| nicotine            | trt_cp | BRD-K05395900  | CHRNA10, CHRNA9, AOX1, CHAT, CHRNA2, CHRNA3, CHRNA4, CHRNA5, CHRNA6, CHRNA7, CHRNB2, CHRNB3, CHRNB4, CYP19A1, CYP2B6, TBXAS1, TRPA1 | Acetylcholine receptor agonist                                             |
| pepstatin           | trt_cp | BRD-K13571841  | CTSB, CTSD, CTSL, REN                                                                                                               | Aspartic protease inhibitor                                                |
| RS-102895           | trt_cp | BRD-K83063356  | CCR2                                                                                                                                | CCR antagonist                                                             |
| TCS-359             | trt_cp | BRD-K81376179  | FLT3                                                                                                                                | FLT3 inhibitor                                                             |
| tamoxifen           | trt_cp | BRD-K04210847  | ESR1, ESR2, CYP3A5, EBP, GPER1, PRKCA, PRKCB, PRKCD, PRKCE, PRKCG, PRKCI, PRKCQ, PRKCZ                                              | Estrogen receptor antagonist, Selective estrogen receptor modulator (SERM) |
| YM-90709            | trt_cp | BRD-K06712146  | CSF2RB, IL5RA                                                                                                                       | IL5 inhibitor                                                              |
| ZM-39923            | trt_cp | BRD-K40624912  | JAK1, JAK3                                                                                                                          | JAK inhibitor                                                              |
| AG-490              | trt_cp | BRD-K12357156  | JAK2, JAK3, EGFR, STAT3                                                                                                             | EGFR inhibitor, ErbB2 inhibitor, JAK inhibitor                             |
| tyrphostin-AG-1296  | trt_cp | BRD-K76064317  | FLT3                                                                                                                                | FLT3 inhibitor                                                             |
| CGP-53353           | trt_cp | BRD-K32292990  | EGFR, PRKCB                                                                                                                         | EGFR inhibitor, PKC inhibitor                                              |

|                      |        |               |                                                                                                                                                                        |                                                                  |
|----------------------|--------|---------------|------------------------------------------------------------------------------------------------------------------------------------------------------------------------|------------------------------------------------------------------|
| dextromethorphan     | trt_cp | BRD-K33211335 | SIGMAR1, CHRNA2, CHRNA3, CHRNA4, CHRNA7, CHRN2B, CHRN2B4, CYBA, CYBB, CYP3A5, GRIN1, GRIN3A, NCF1, NCF2, NCF4, OPRD1, OPRK1, OPRM1, PGRMC1, RAC1, RAC2, SLC6A2, SLC6A4 | Glutamate receptor antagonist, Sigma receptor agonist            |
| gamma-linolenic-acid | trt_cp | BRD-K18059238 | TBXAS1                                                                                                                                                                 | Cyclooxygenase inhibitor, Prostanoid receptor agonist            |
| GTP-14564            | trt_cp | BRD-K16664969 | FLT3, CSF1R, KIT, PDGFRB                                                                                                                                               | FLT3 inhibitor, Tyrosine kinase inhibitor                        |
| hispidin             | trt_cp | BRD-K07325606 | PREP, PRKCB, PTGS2, XDH                                                                                                                                                | PKC inhibitor                                                    |
| JAK3-inhibitor-I     | trt_cp | BRD-K72541103 | JAK3                                                                                                                                                                   | JAK inhibitor                                                    |
| JAK3-Inhibitor-II    | trt_cp | BRD-K52850071 | EGFR, ALK, JAK1, JAK2, JAK3                                                                                                                                            | JAK inhibitor                                                    |
| JAK3-inhibitor-V     | trt_cp | BRD-K95676198 | JAK3                                                                                                                                                                   | JAK inhibitor                                                    |
| JAK3-inhibitor-VI    | trt_cp | BRD-K04546108 | JAK3                                                                                                                                                                   | JAK inhibitor                                                    |
| leflunomide          | trt_cp | BRD-K78692225 | DHODH, AHR, CYP2C19, JAK3, PTK2B, STAT6                                                                                                                                | Dihydroorotate dehydrogenase inhibitor, PDGFR receptor inhibitor |
| MDL-28170            | trt_cp | BRD-K43245338 | CAPN1, CTSB, CTSL                                                                                                                                                      | Calpain inhibitor                                                |
| ozagrel              | trt_cp | BRD-K19525698 | TBXAS1                                                                                                                                                                 | Thromboxane synthase inhibitor                                   |
| D-64406              | trt_cp | BRD-K27665173 | FLT3, PDGFRA, PDGFRB                                                                                                                                                   | PDGFR receptor inhibitor                                         |
| midostaurin          | trt_cp | BRD-K13646352 | FLT3, KIT, CCNB1, FLT1, KDR, PDGFRB, PRKCA, PRKCG, VEGFA                                                                                                               | FLT3 inhibitor, KIT inhibitor, PKC inhibitor                     |
| pseudoephedrine      | trt_cp | BRD-K84175871 | ADRA1A, ADRA2A, ADRB1, ADRB2, ATF1, ATF2, ATF3, ATF4, ATF5, ATF6, ATF7, CXCL8, FOS, HRH1, IL2, JDP2, JUN, NFATC1, SLC6A2, SLC6A3, SLC6A4, TNF                          | Adrenergic receptor agonist                                      |
| picotamide           | trt_cp | BRD-K67277431 | TBXA2R, TBXAS1                                                                                                                                                         | Thromboxane receptor antagonist, Thromboxane synthase inhibitor  |
| RS-504393            | trt_cp | BRD-K87510569 | CCR2, CCL2                                                                                                                                                             | CC chemokine receptor antagonist                                 |
| tretinoin            | trt_cp | BRD-K06926592 | RARG, RORB, ALDH1A1, ALDH1A2, GPRC5A, NR0B1, NR2C2, PPARD, RARA, RARB, RARRES1, RORC, RXRB, RXRG                                                                       | Retinoid receptor agonist, Retinoid receptor ligand              |

|                   |        |               |                                                                                                          |                                                                                                                        |
|-------------------|--------|---------------|----------------------------------------------------------------------------------------------------------|------------------------------------------------------------------------------------------------------------------------|
| semaxanib         | trt_cp | BRD-K63504947 | KDR, FLT1, KIT, PDGFRB, FGFR1, FLT3, MET, PDGFRA, RET                                                    | VEGFR inhibitor                                                                                                        |
| T-0901317         | trt_cp | BRD-K23383398 | NR1H3, NR1H2, ABCA1, NCOA1, NCOA2, NR1I2, RORA, RORC, RXRB                                               | LXR agonist, ABC transporter expression enhancer, ROR inverse agonist                                                  |
| tranilast         | trt_cp | BRD-K19533706 | HPGDS, HRH1, IDO1, IFNG, IL10, IL2, IL4, SLC22A12, TGFB1, TNF, TRPV2                                     | Angiogenesis inhibitor                                                                                                 |
| NF-449            | trt_cp | BRD-K36324071 | P2RX1                                                                                                    | Purinergic receptor antagonist                                                                                         |
| PKCbeta-inhibitor | trt_cp | BRD-K89687904 | PRKCB                                                                                                    | PKC inhibitor                                                                                                          |
| quinine           | trt_cp | BRD-U94846492 | KCNN4, ABCB1, CYP2D6, GP9, KCNB2, SLC29A4                                                                | Hemozoin biocrystallization inhibitor                                                                                  |
| fostamatinib      | trt_cp | BRD-K20285085 | SYK, FLT3, RET                                                                                           | SYK inhibitor                                                                                                          |
| SID-26681509      | trt_cp | BRD-K08417745 | CTSL                                                                                                     | Cathepsin inhibitor                                                                                                    |
| TG-101348         | trt_cp | BRD-K12502280 | JAK2, FLT3, BRD4, JAK1, JAK3, RET, TYK2                                                                  | FLT3 inhibitor, JAK inhibitor                                                                                          |
| atorvastatin      | trt_cp | BRD-U88459701 | HMGCR, DPP4, AHR, CYP3A5, FASLG                                                                          | HMGCR inhibitor                                                                                                        |
| forskolin         | trt_cp | BRD-A70449690 | ADCY2, ADCY5, GNAS                                                                                       | Adenylyl cyclase activator                                                                                             |
| HG-6-64-01        | trt_cp | BRD-U37049823 | ABL1, BRAF, CSF1R, EGFR, FGFR1, FLT3, KIT, MAPK11, PDGFRB, RET                                           | RAF inhibitor                                                                                                          |
| tozasertib        | trt_cp | BRD-K59369769 | AURKA, AURKB, ABL1, AURKC, BCR, FLT3, JAK2, DDR2, LCK                                                    | Aurora kinase inhibitor, BCR-ABL kinase inhibitor, FLT3 inhibitor, JAK inhibitor                                       |
| sorafenib         | trt_cp | BRD-K49810818 | RET, BRAF, FLT3, KDR, RAF1, FLT1, FLT4, KIT, DDR2, FGFR1, PDGFRB, CYP2B6, CYP2C8, CYP3A5, PDGFB, SLCO1B3 | FLT3 inhibitor, KIT inhibitor, PDGFR receptor inhibitor, RAF inhibitor, VEGFR inhibitor, RET tyrosine kinase inhibitor |
| tandutinib        | trt_cp | BRD-K89162000 | FLT3, KIT, PDGFRA, PDGFRB, CSF1R, PDGFD                                                                  | FLT3 inhibitor, KIT inhibitor, PDGFR receptor inhibitor                                                                |
| sitagliptin       | trt_cp | BRD-K19416115 | DPP4, CYP2C8, FASLG, HMGCR, SLC22A8                                                                      | Dipeptidyl peptidase inhibitor                                                                                         |
| tofacitinib       | trt_cp | BRD-K31283835 | JAK3, JAK1, JAK2, CYP2C19, TYK2                                                                          | JAK inhibitor                                                                                                          |
| sulfasalazine     | trt_cp | BRD-K10670311 | PTGS1, PTGS2, ACAT1, ALOX5, CHUK, IKBKB, PLA2G1B, PPARG, SLC46A1, SLC7A11, TBXAS1                        | Antirheumatic, NFkB pathway inhibitor                                                                                  |
| QL-X-138          | trt_cp | BRD-U33728988 | BTk, JAK3, MKNK2, MTOR, PRKDC                                                                            | MTOR inhibitor                                                                                                         |

|                    |        |                    |                                                                                                                         |                                                                                                         |
|--------------------|--------|--------------------|-------------------------------------------------------------------------------------------------------------------------|---------------------------------------------------------------------------------------------------------|
| tyrphostin-AG-1295 | trt_cp | BRD-K57926513      | FLT3, KDR, PDGFRA, PDGFRB                                                                                               | PDGFR receptor inhibitor                                                                                |
| ruxolitinib        | trt_cp | BRD-K53972329      | JAK1, JAK2, TYK2, JAK3                                                                                                  | JAK inhibitor                                                                                           |
| isotretinoin       | trt_cp | BRD-K76723084      | CYP2B6, CYP2C19, CYP2C8, CYP3A5, CYP3A7, NR2C2, PPARD, RARA, RARB, RARG, RORB, RORC                                     | Retinoid receptor agonist                                                                               |
| enzastaurin        | trt_cp | BRD-K79404599      | PRKCB, AKT1, GSK3B, PRKCA, PRKCD, PRKCG                                                                                 | PKC inhibitor                                                                                           |
| KIN001-055         | trt_cp | BRD-K68407802      | EGFR, JAK3                                                                                                              | EGFR inhibitor, JAK inhibitor, Leukotriene inhibitor, Mediator release inhibitor                        |
| quizartinib        | trt_cp | BRD-K93918653      | FLT3, CSF1R, KIT, RET, PDGFRA, PDGFRB                                                                                   | FLT3 inhibitor                                                                                          |
| lestaurtinib       | trt_cp | BRD-K23192422      | FLT3, NTRK1, JAK2, NTRK2, NTRK3                                                                                         | FLT3 inhibitor, Growth factor receptor inhibitor, JAK inhibitor                                         |
| linifanib          | trt_cp | BRD-K99749624      | CSF1R, KDR, PDGFRB, FLT1, FLT3, FLT4, CSF1, KIT, PDGFRA, RET, TEK                                                       | PDGFR receptor inhibitor, VEGFR inhibitor                                                               |
| bosutinib          | trt_cp | BRD-K99964838      | ABL1, SRC, BCR, CAMK2G, LYN, CAMK1D, CDK2, FRK, FYN, HCK, MAP2K1, MAP2K2, MAP3K2, MAP4K5, STK10, STK24, STK4, TNK2, TXK | ABL inhibitor, BCR-ABL kinase inhibitor, SRC inhibitor                                                  |
| cediranib          | trt_cp | BRD-K86930074      | KDR, FLT1, FLT4, KIT, PDGFRB, CSF1R, FLT3, PDGFRA                                                                       | KIT inhibitor, VEGFR inhibitor                                                                          |
| dovitinib          | trt_cp | BRD-K85402309      | EGFR, FGFR3, PDGFRB, CSF1R, FGFR1, FGFR2, FLT1, FLT3, FLT4, INSR, KDR, KIT, PDGFRA                                      | EGFR inhibitor, FLT3 inhibitor, FGFR inhibitor, PDGFR receptor inhibitor, VEGFR inhibitor               |
| sunitinib          | trt_cp | BRD-M64432851      | FLT3, KDR, KIT, FLT4, FLT1, PDGFRA, PDGFRB, RET, CSF1R, FGFR1                                                           | FLT3 inhibitor, KIT inhibitor, PDGFR receptor inhibitor, RET tyrosine kinase inhibitor, VEGFR inhibitor |
| sunitinib          | trt_cp | BRD-K70511574      | FLT3, KDR, KIT, FLT4, FLT1, PDGFRA, PDGFRB, RET, CSF1R, FGFR1                                                           | PLK inhibitor                                                                                           |
| prostratin         | trt_cp | BRD-K91145395      | PRKCA, PRKCB, PRKCD, PRKCE, PRKCG, PRKCH, PRKCQ                                                                         | PKC activator                                                                                           |
| CD14               | trt_oe | ccsbBroad304_00249 |                                                                                                                         |                                                                                                         |
| CD19               | trt_oe | ccsbBroad304_00250 |                                                                                                                         |                                                                                                         |
| LSP1               | trt_oe | ccsbBroad304_06538 |                                                                                                                         |                                                                                                         |
| PRKCB              | trt_oe | ccsbBroad304_01282 |                                                                                                                         |                                                                                                         |
| RORC               | trt_oe | ccsbBroad304_01411 |                                                                                                                         |                                                                                                         |
| C2                 | trt_oe | ccsbBroad304_00184 |                                                                                                                         |                                                                                                         |
| EGR3               | trt_oe | ccsbBroad304_00488 |                                                                                                                         |                                                                                                         |



|           |            |                    |                                                                                   |                                                                                                                                              |
|-----------|------------|--------------------|-----------------------------------------------------------------------------------|----------------------------------------------------------------------------------------------------------------------------------------------|
| FASLG     | trt_oe     | ccsbBroad304_00088 |                                                                                   |                                                                                                                                              |
| FGB       | trt_oe     | ccsbBroad304_00554 |                                                                                   |                                                                                                                                              |
| IL2       | trt_oe     | ccsbBroad304_00846 |                                                                                   |                                                                                                                                              |
| CFD       | trt_sh.cgs | CGS001-1675        |                                                                                   |                                                                                                                                              |
| EGR3      | trt_sh.cgs | CGS001-1960        |                                                                                   |                                                                                                                                              |
| FGB       | trt_sh.cgs | CGS001-2244        |                                                                                   |                                                                                                                                              |
| FLT3      | trt_sh.cgs | CGS001-2322        |                                                                                   |                                                                                                                                              |
| IL2       | trt_sh.cgs | CGS001-3558        |                                                                                   |                                                                                                                                              |
| FASLG     | trt_sh.cgs | CGS001-356         |                                                                                   |                                                                                                                                              |
| IL5       | trt_sh.cgs | CGS001-3567        |                                                                                   |                                                                                                                                              |
| INPP5D    | trt_sh.cgs | CGS001-3635        |                                                                                   |                                                                                                                                              |
| JAK3      | trt_sh.cgs | CGS001-3718        |                                                                                   |                                                                                                                                              |
| LSP1      | trt_sh.cgs | CGS001-4046        |                                                                                   |                                                                                                                                              |
| PRKCB     | trt_sh.cgs | CGS001-5579        |                                                                                   |                                                                                                                                              |
| RORC      | trt_sh.cgs | CGS001-6097        |                                                                                   |                                                                                                                                              |
| C2        | trt_sh.cgs | CGS001-717         |                                                                                   |                                                                                                                                              |
| CD14      | trt_sh.cgs | CGS001-929         |                                                                                   |                                                                                                                                              |
| CD19      | trt_sh.cgs | CGS001-930         |                                                                                   |                                                                                                                                              |
| AT-9283   | trt_cp     | BRD-K24576554      | AURKA, AURKB, ABL1, BCR, FLT3, JAK2, JAK3, RPS6KA6, STK17A                        | JAK inhibitor, Aurora kinase inhibitor, ABL inhibitor, BCR-ABL kinase inhibitor, FLT3 inhibitor, Mitotic inhibitor, Protein kinase inhibitor |
| ENMD-2076 | trt_cp     | BRD-K68488863      | AURKA, FLT3, KDR, PDGFRA, SRC, CSF1R, EPHA1, FGFR1, FGFR2, FGFR3, FLT4, KIT, PTK2 | FLT3 inhibitor, VEGFR inhibitor, Aurora kinase inhibitor                                                                                     |

---

Supplementary Figure S1. GSE87340 dataset gene set enrichment for pathway analysis for normal tissue and LUAD

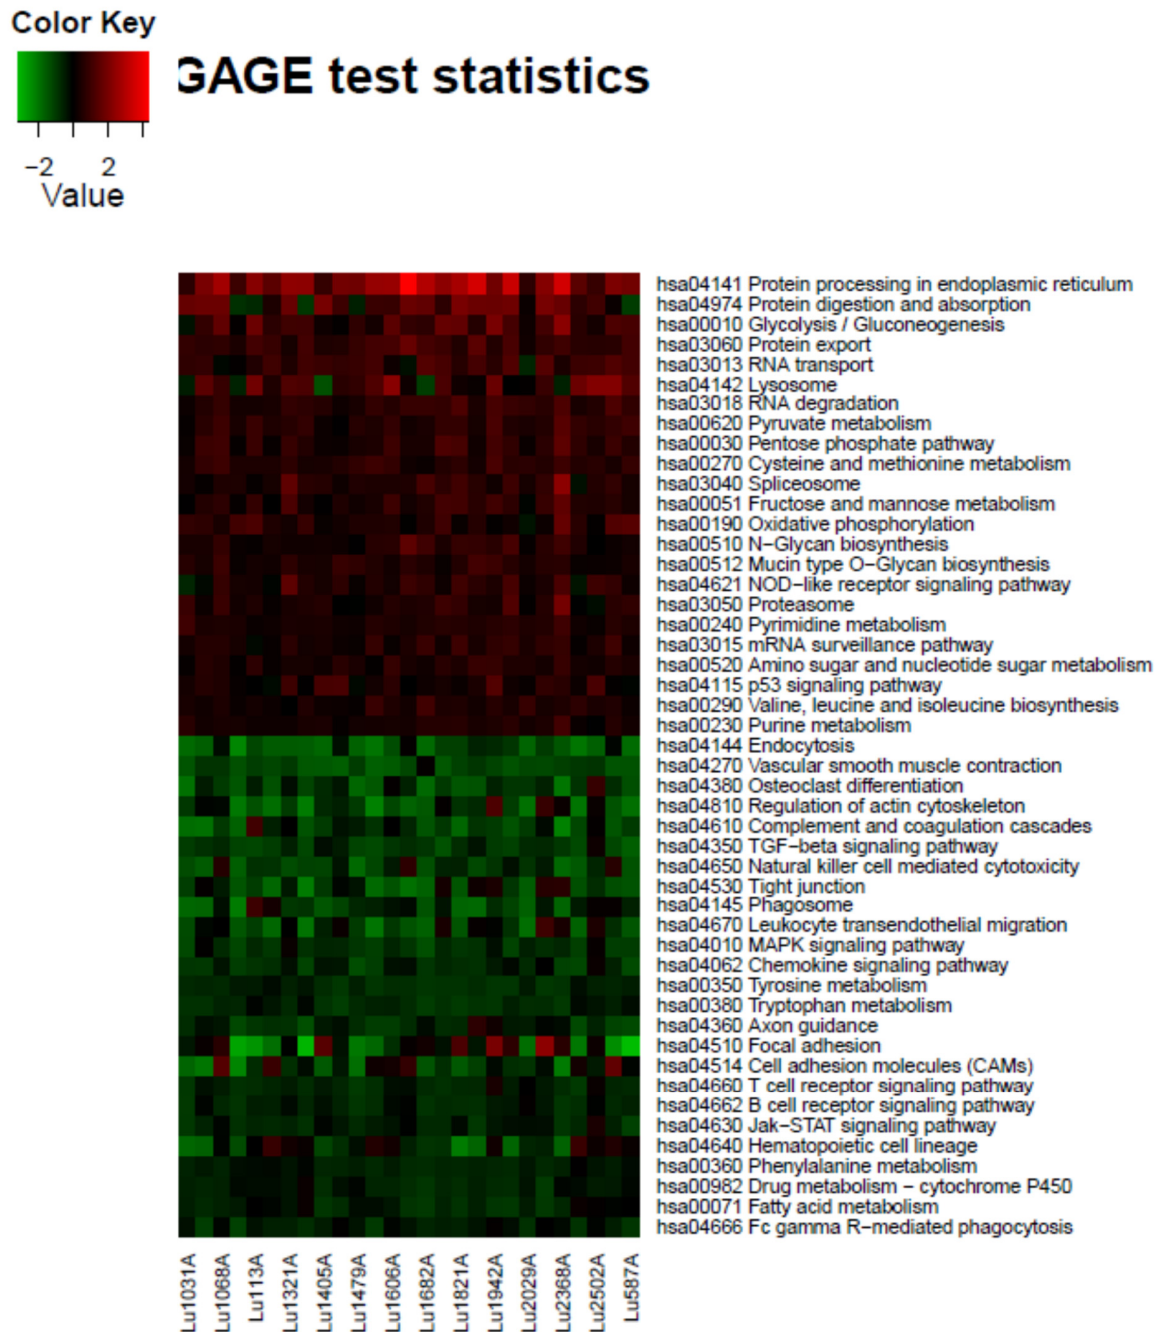

Supplementary Figure S2. GSE120622 dataset gene set enrichment for pathway analysis for normal tissue compared to LUAD

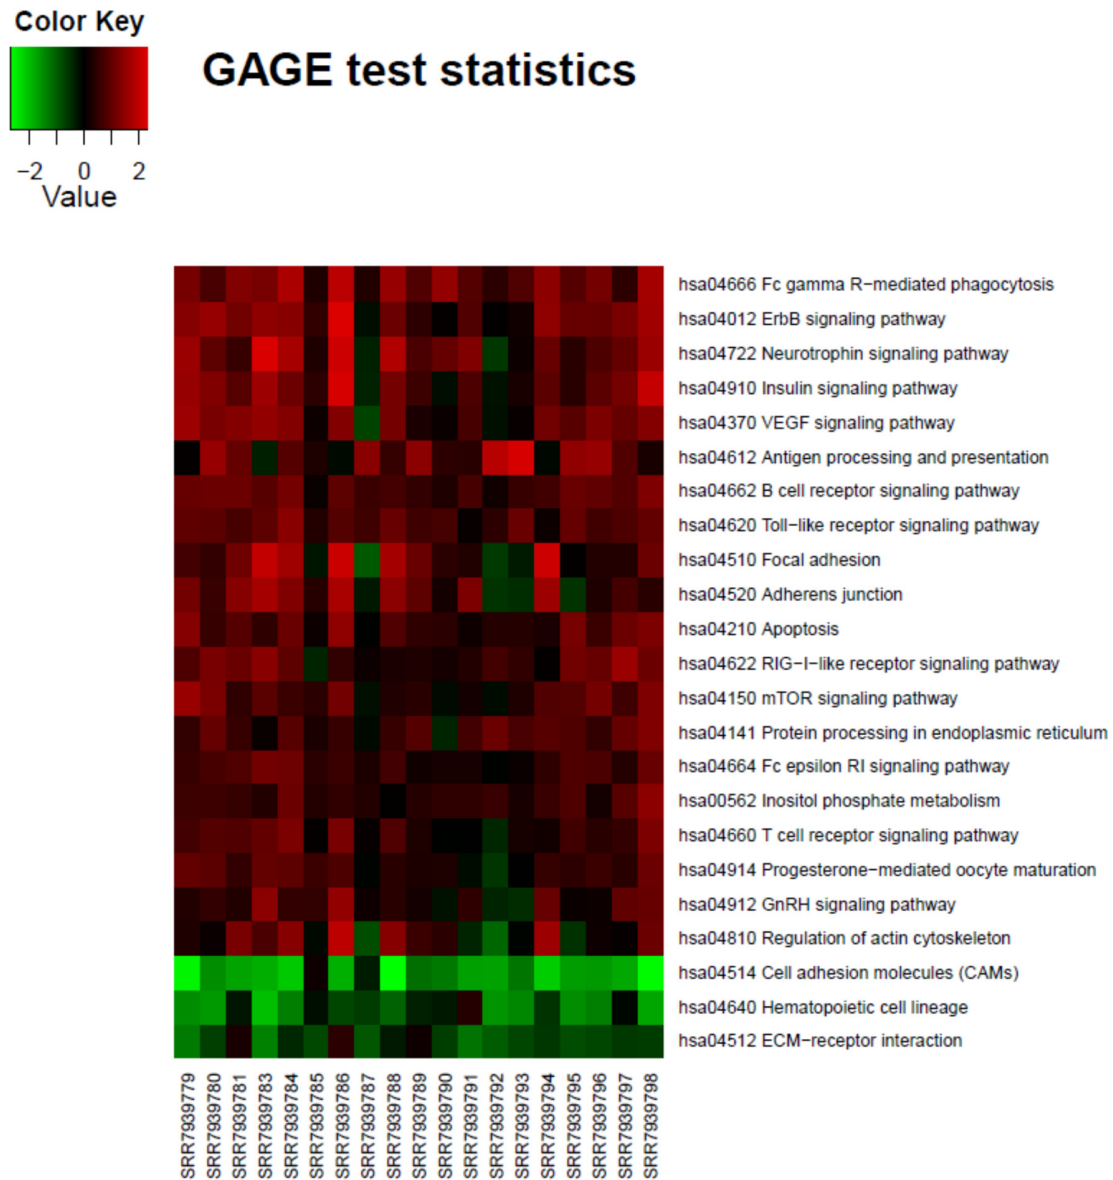

Supplementary Figure S3. gse120622 dataset gene set enrichment for pathway analysis for normal tissue compared to LUSC

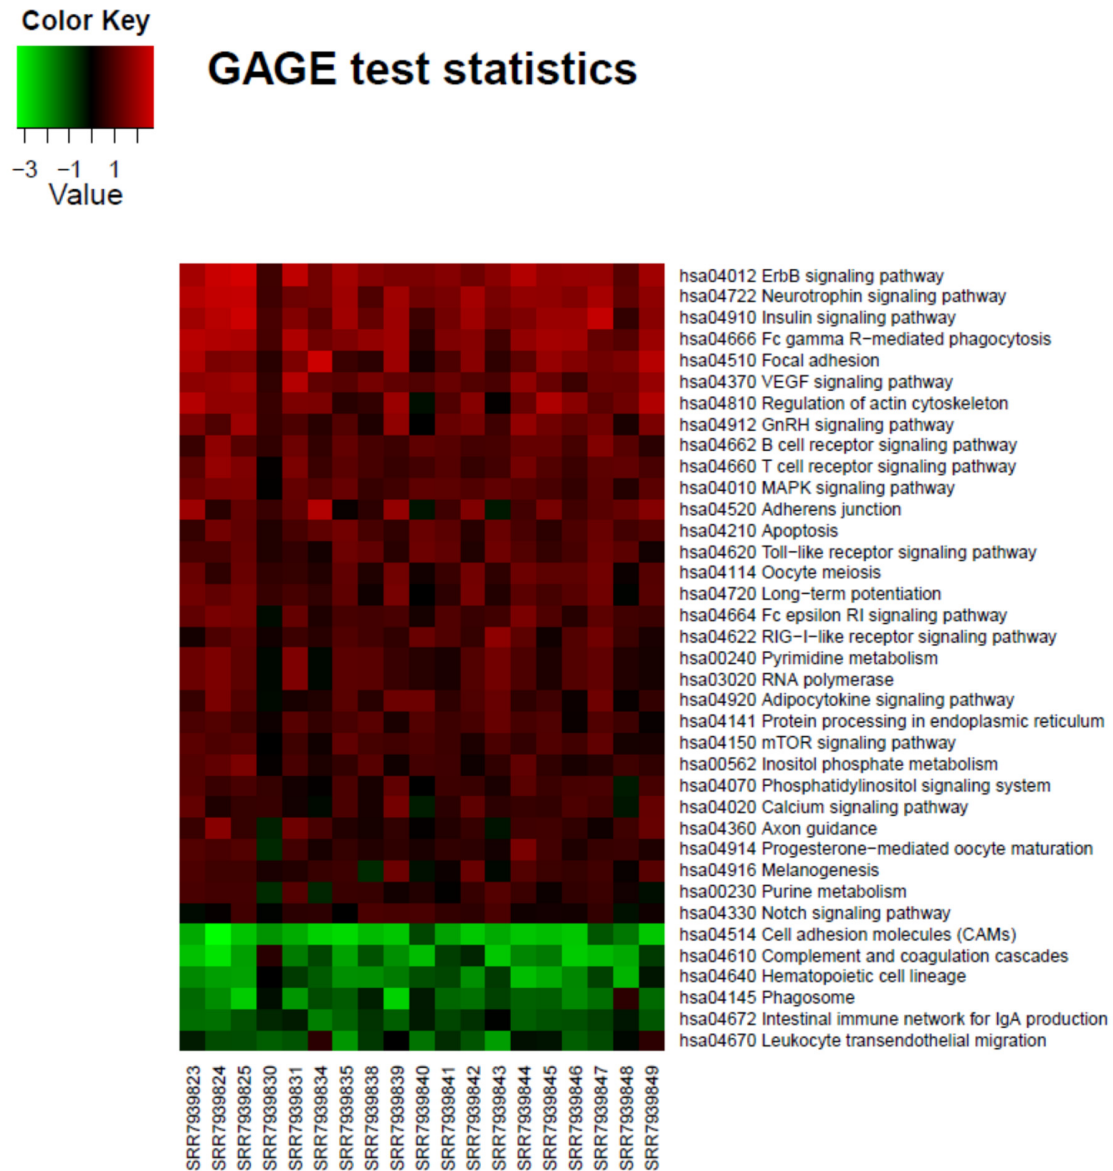

Supplementary Figure S4. GSE111907-1 dataset gene set enrichment for pathway analysis for normal tissue compared to LUAD

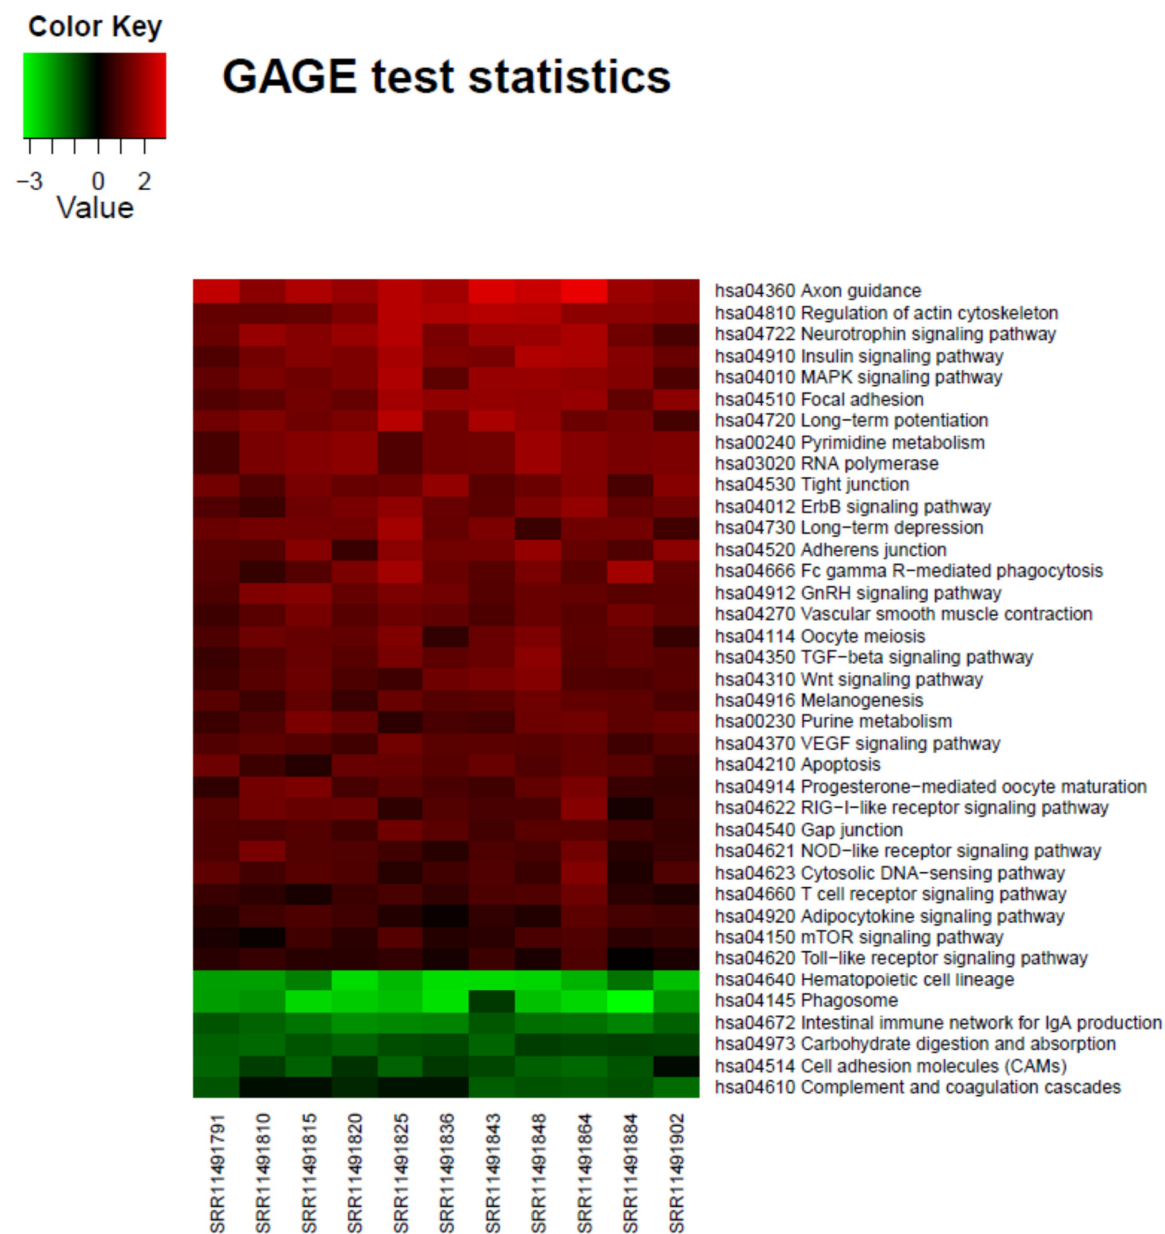

Supplementary Figure S5. GSE111907-2 dataset gene set enrichment for pathway analysis for normal tissue compared to LUSC

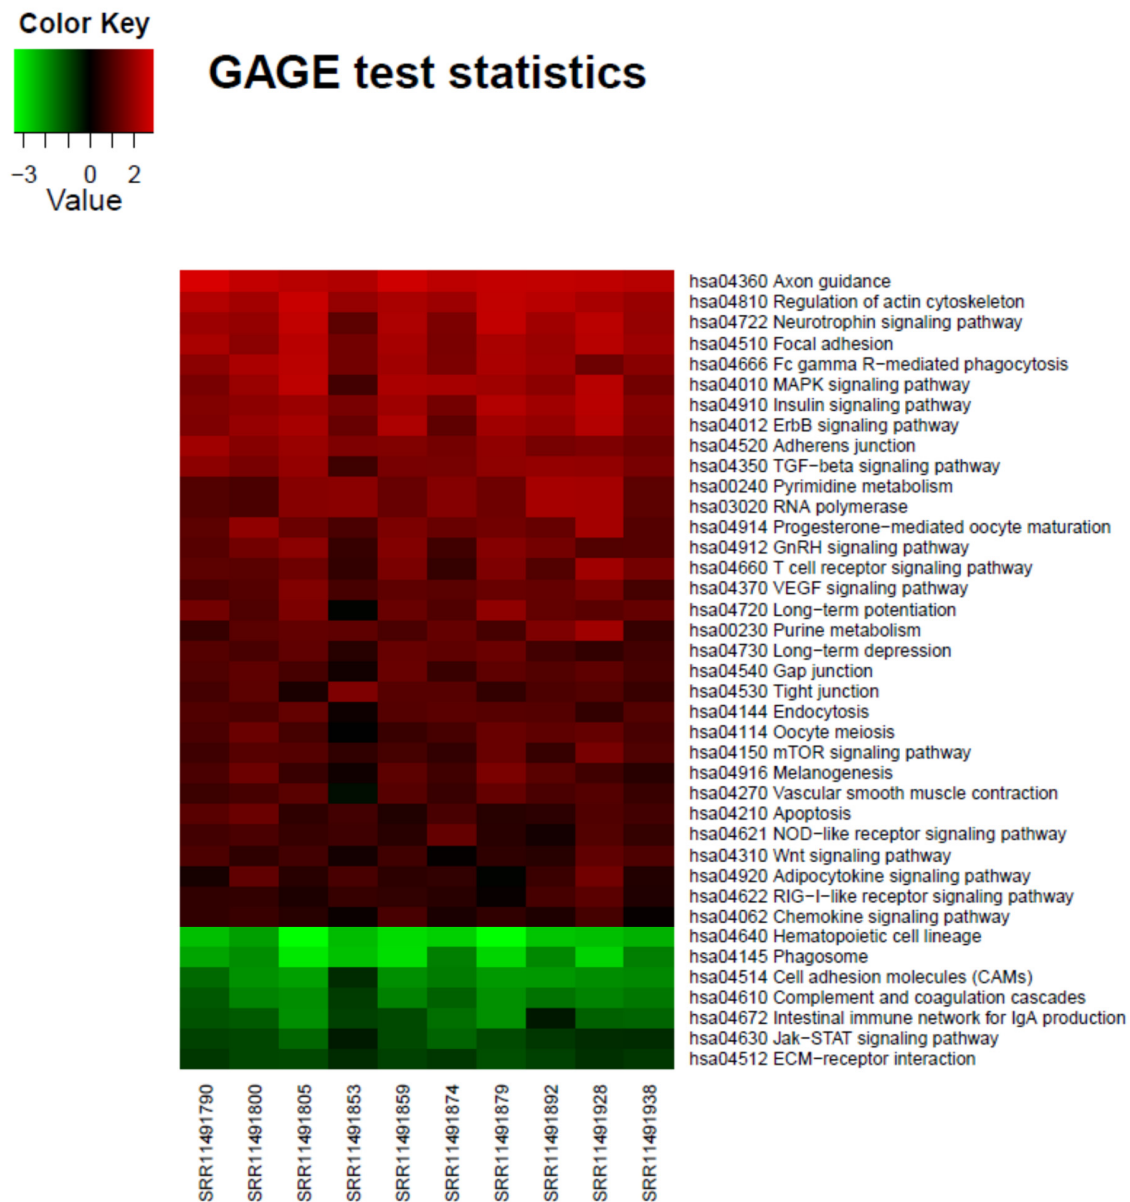

Supplementary Figure S6. Constructed network of GSE1119707-1 sorted fibroblast and endothelial cell from LUAD

GSE111907-1 sorted fibroblast

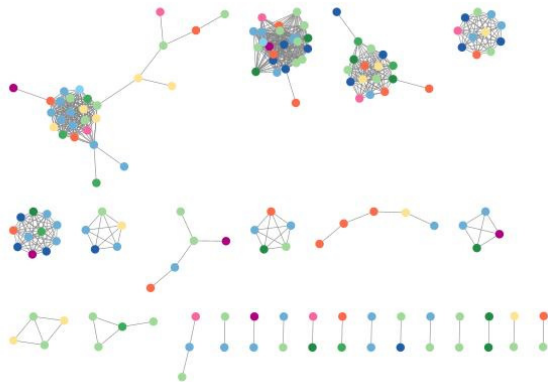

GSE111907-1 sorted endothelial cell

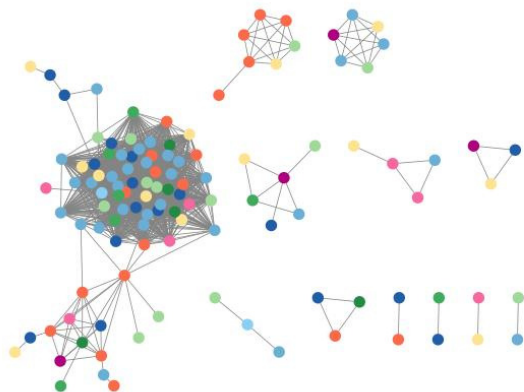

- Adaptive immunity
- Antigen presentation
- Coagulation
- Hematopoiesis
- Innate Immunity
- Cytokine Chemokine
- Leukocyte migration
- NK cell activity
- Platelet
- Singaling



Supplementary Figure S7. Constructed network of GSE1119707-2 sorted fibroblast and endothelial cell from LUSC

GSE111907-2 sorted fibroblast

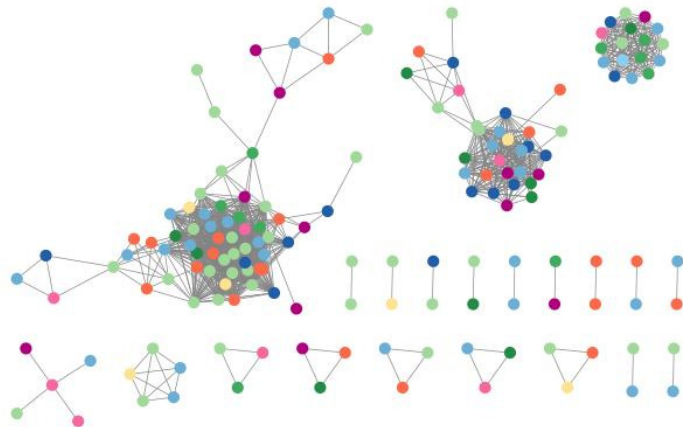

GSE111907-2 sorted endothelial cell

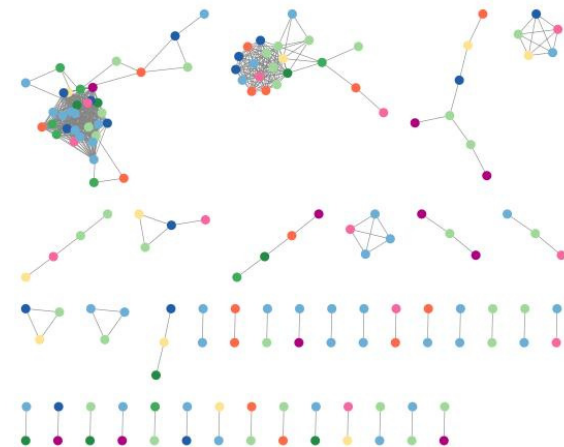

- Adaptive immunity
- Antigen presentation
- Coagulation
- Hematopoiesis
- Innate Immunity
- Cytokine Chemokine
- Leukocyte migration
- NK cell activity
- Platelet
- Signaling



Supplementary Figure S8. Proportion of annotated gene function within the network  
GSE87340 and GSE1290622. Normal (blue), LUAD (red) and LUSC (green) are plotted

GSE87340

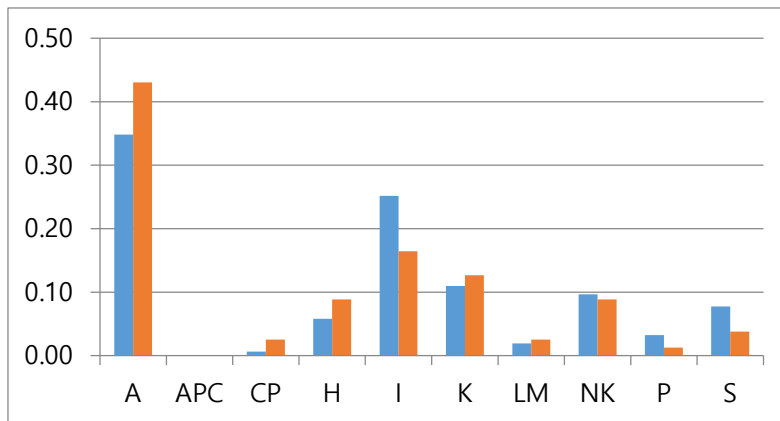

GSE120622

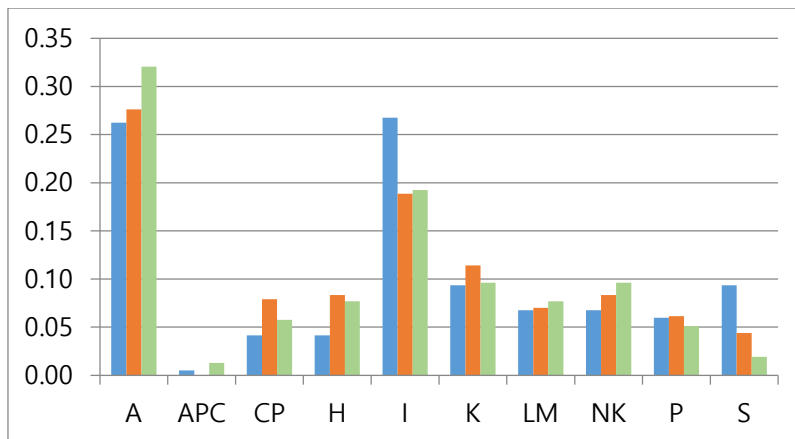

LUAD, adenocarcinoma non-small-cell lung cancer; LUSC, squamous non-small-cell lung carcinoma; A, adaptive immunity; APC, antigen presentation; CP, coagulation; H, hematopoiesis; I, innate immunity; K, cytokine and chemokine; LM, leukocyte migration; NK, NK cell; P, platelet; S, signaling

Supplementary Figure S9. Proportion of annotated gene function within the network

GSE111907-1 and GSE111907-2. Normal (blue), LUAD (red) and LUSC (green) are plotted

GSE111907-1

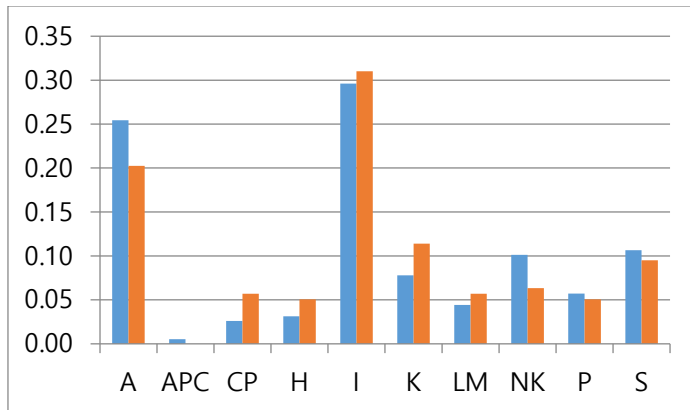

GSE111907-2

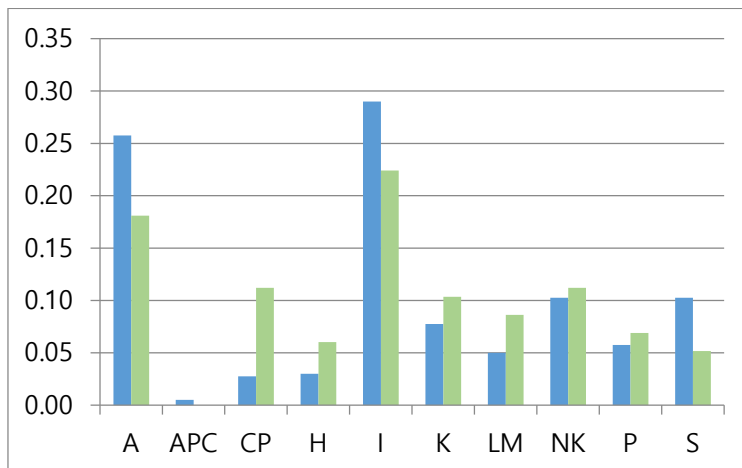

LUAD, adenocarcinoma non-small-cell lung cancer; LUSC, squamous non-small-cell lung carcinoma; A, adaptive immunity; APC, antigen presentation; CP, coagulation; H, hematopoiesis; I, innate immunity; K, cytokine and chemokine; LM, leukocyte migration; NK, NK cell; P, platelet; S, signaling

Supplementary Figure S10. Connectivity map analysis for network gene expression signatrures.

GSE120622 LUAD

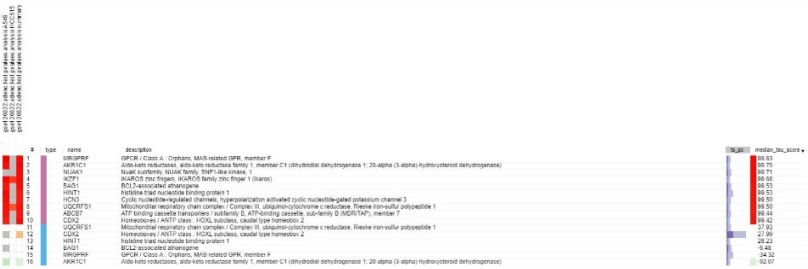

GSE120622 LUSC

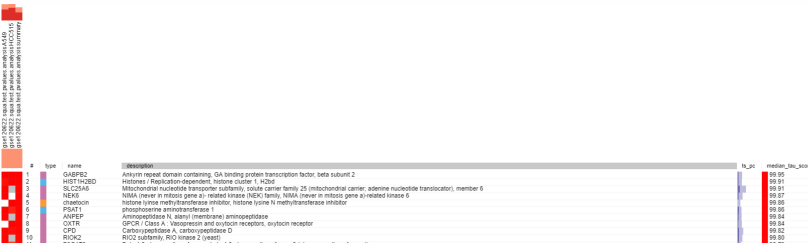

GSE111907-1 LUAD

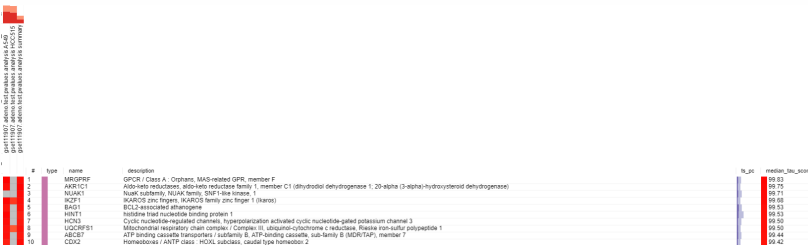

GSE111907-2 LUSC

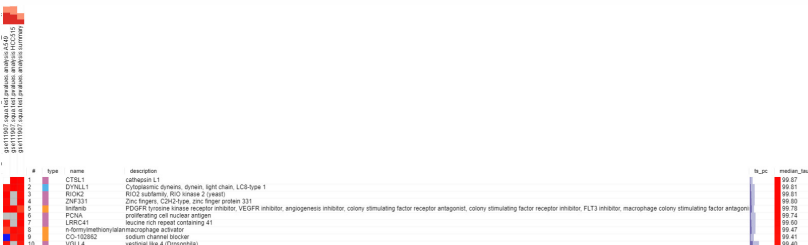

Supplement: s1 [file s1]
